# Supplementary material for: Rhodium-catalyzed intramolecular cascade sequence for the formation of fused carbazole-annulated medium-sized rings by cleavage of C(sp2)–H/C(sp3)–H bonds
Source: Royal Society of Chemistry journal article supplement (doi:10.1039/c8cc04428g), 2018-01-01
Supplement: c8cc04428g1.pdf [file c8cc04428g1.pdf]

## Supporting Information

### **Rhodium-catalyzed Intramolecular Cascade Sequence for the Formation of Fused Carbazole-annulated Medium-sized Rings by Cleavage of C(sp<sup>2</sup>)-H/C(sp<sup>3</sup>)-H Bonds**

Qiuyun Li<sup>†</sup>, Bin Li<sup>†</sup>, and Baiquan Wang<sup>\*, †, ‡, §</sup>

<sup>†</sup>State Key Laboratory of Elemento-Organic Chemistry, College of Chemistry, and

<sup>‡</sup>Collaborative Innovation Center of Chemical Science and Engineering (Tianjin), Nankai University, Tianjin 300071, People's Republic of China

<sup>§</sup>State Key Laboratory of Organometallic Chemistry, Shanghai Institute of Organic Chemistry, Chinese Academy of Sciences, Shanghai 200032, People's Republic of China

## Contents

|                                                                                            |         |
|--------------------------------------------------------------------------------------------|---------|
| Table of Contents                                                                          | S2      |
| 1. General Information                                                                     | S3      |
| 2. General procedures for the substrates                                                   | S3-S4   |
| 3. General Procedure for the Synthesis of <b>2</b>                                         | S5      |
| 4. Gram-scale Synthesis of <b>2a</b>                                                       | S5      |
| 5. Transformations of <b>2a</b>                                                            | S5-S6   |
| 6. Experimental Data                                                                       | S6-S22  |
| 7. Copies of <sup>1</sup> H, <sup>13</sup> C and <sup>19</sup> F NMR Spectra for Compounds | S23-S70 |
| 8. References                                                                              | S71     |

## 1. General Information

All the reactions were carried out under argon atmosphere using standard sealed Schlenk technique.  $^1\text{H}$  NMR (400 MHz),  $^{13}\text{C}$  NMR (101 MHz), and  $^{19}\text{F}$  (376 MHz) were recorded on a NMR spectrometer with  $\text{DMSO-}d_6$  and  $\text{CDCl}_3$  as solvent. Chemical shifts of  $^1\text{H}$ ,  $^{13}\text{C}$  and  $^{19}\text{F}$  NMR spectra are reported in parts per million (ppm). The residual solvent signals were used as references and the chemical shifts converted to the TMS scale ( $\text{CDCl}_3$ :  $\delta_{\text{H}} = 7.26$  ppm,  $\delta_{\text{C}} = 77.16$  ppm;  $\text{DMSO-}d_6$ :  $\delta_{\text{H}} = 2.50$  ppm,  $\delta_{\text{C}} = 39.43$  ppm). All coupling constants ( $J$  values) were reported in Hertz (Hz). Multiplicities are reported as follows: singlet (s), doublet (d), doublet of doublets (dd), doublet of doublet of doublets (ddd), doublet of triplets (dt), triplet (t), triplet of doublets (td), quartet (q), and multiplet (m). Column chromatography was performed on silica gel 200–300 mesh. Analytical thin-layer chromatography (TLC) was performed on pre-coated, glass-backed silica gel plates. Visualization of the developed chromatogram was performed by UV absorbance (254 nm and 365nm). High-resolution mass spectrometry (HRMS) was done on a FTICR-mass spectrometer (0.3 mm thickness). Column chromatography was performed on silica gel (200-300 mesh) using ethyl acetate (EA)/petroleum ether (PE)/dichloromethane(DCM).

## 2. General Procedures for the Substrates

a) General procedure for the preparation of compounds **11**.<sup>[1]</sup>

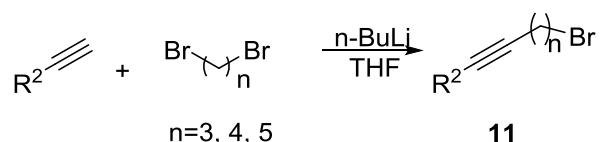

2.5 M *n*-butyllithium in hexane (0.10 mol) was added to a solution of terminal alkyne (0.12 mol) in THF (40 mL) at an ice bath. The solution was heated to reflux until gas evolution ceased. The appropriate dihalide (0.14 mol) was added and the reaction mixture was heated to reflux overnight. After cooling, 2 ml of water was added carefully and extracted with EA, the organic layer was dried ( $\text{Na}_2\text{SO}_4$ ) and concentrated. Vacuum distillation of the residual oil gave the desired product.

b) General procedure for the preparation of substrates **1**.<sup>[2]</sup>

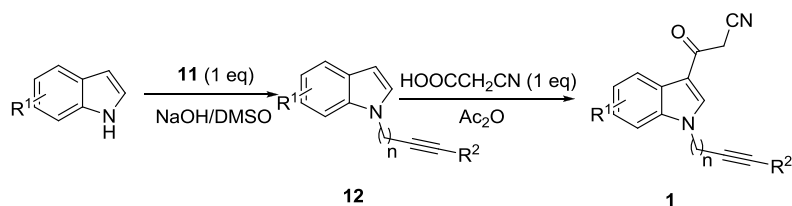

To a suspension of NaOH (2 eq) in 10 mL of DMSO was added indole (1 eq), **11** (1.05 eq). The reaction mixture was then warmed to 40 °C and stirred overnight. The resulting suspension was poured into water and extracted with EA. The combined organic layers were washed with water, dried over anhydrous Na<sub>2</sub>SO<sub>4</sub>, and filtered, the solvent was removed in vacuo. The crude product was purified by column chromatography (silica gel, eluent: petroleum) to obtain product **12** as a yellowish oil. **12** (1eq) was added to a solution prepared by dissolution of cyanoacetic acid (1.05 eq) in Ac<sub>2</sub>O (10 ml) at rt. The solution was heated at 85 °C for 1–4 h. Remove the solvent, dissolved in EA, washed with water, dried over Na<sub>2</sub>SO<sub>4</sub>, and filtered, the solvent was removed in vacuo. The crude product was purified by column chromatography (silica gel, eluent: petroleum /DCM /EA = 3:1:1) to obtain product **1**. Total yield 43–78%.

### 3. General Procedure for the Synthesis of **2**

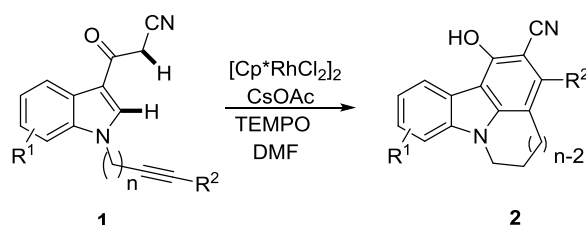

A mixture of **1** (0.2 mmol, 1.0 equiv), [Cp\**RhCl*<sub>2</sub>]<sub>2</sub> (5.0 mol %), CsOAc (0.4 mmol, 2.0 eq), and TEMPO (0.4 mmol, 2.0 equiv) was weighed in a sealed Schlenk tube equipped with a stir bar. Dry DMF (1.0 mL) was added and the mixture was stirred at 100 °C for 12 h under an Ar atmosphere. After the mixture was cooled to room temperature, the solvent was evaporated under reduced pressure and the residue was purified by a silica gel column using PE /EA /CH<sub>2</sub>Cl<sub>2</sub> (10/1/1) as eluent to give pure product **2**.

### 4. Gram-scale Synthesis of **2a**

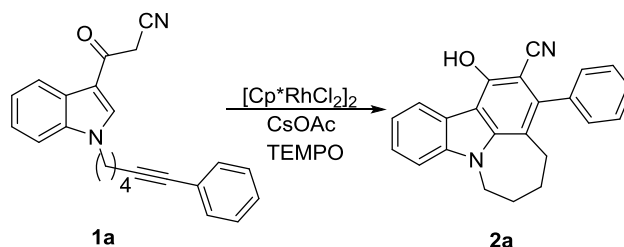

A mixture of **1a** (1.02 g, 3.0 mmol), [Cp\**RhCl*<sub>2</sub>]<sub>2</sub> (0.07 g, 4 mol %), CsOAc (1.15 g, 6.0 mmol), and TEMPO (0.94 g, 6.0 mmol) was weighed in a sealed Schlenk tube. Dry DMF (10 mL) was added and the mixture was heat at 100 °C for 12 h under an Ar atmosphere. After the mixture was cooled to room temperature, the solvent was evaporated under reduced

pressure and the residue was purified by a silica gel column using PE /EA /CH<sub>2</sub>Cl<sub>2</sub> (10/1/1) as eluent to give pure product **2a** in 89% yield (0.88 g).

## 5. Transformations of **2a**<sup>[3]</sup>

### (1) Transformation of **2a** to **8**

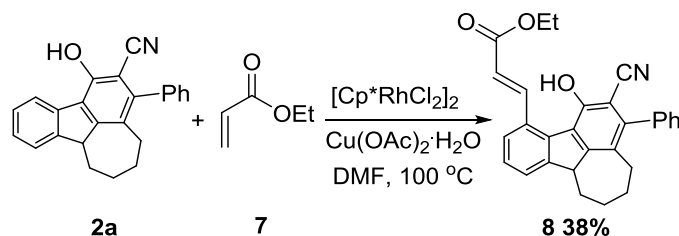

A mixture of **2a** (0.2 mmol, 1.0 equiv), ethyl acrylate (**7**) (0.3 mmol, 1.5 equiv), [Cp\**RhCl*<sub>2</sub>]<sub>2</sub> (0.01 mmol, 5.0 mol %), and Cu(OAc)<sub>2</sub>·H<sub>2</sub>O (0.4 mmol, 2.0 equiv) were weighted in a Schlenk tube equipped with a stir bar. Dry DMF (1.0 mL) was added and the mixture was stirred at 100 °C for 18 h under Ar atmosphere. Afterwards, it was diluted with CH<sub>2</sub>Cl<sub>2</sub> and transferred to a round bottom flask. Silica was added to the flask and volatiles were evaporated under reduced pressure. The purification was performed by flash column chromatography on silica gel with EtOAc/PE, get pure product **8** in 38% yield.

### (2) Transformations of **2a** to **10**

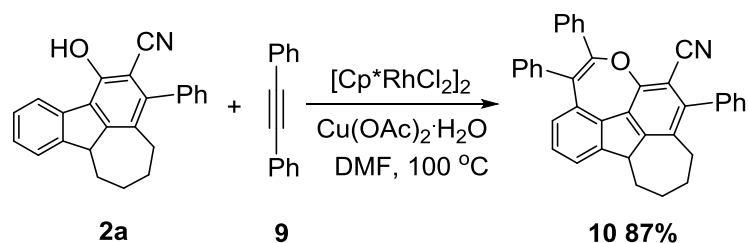

A mixture of **2a** (0.2 mmol, 1 equiv), alkyne (**9**) (0.22 mmol, 1.1 equiv), [Cp\**RhCl*<sub>2</sub>]<sub>2</sub> (0.01 mmol, 5.0 mol %), and Cu(OAc)<sub>2</sub>·H<sub>2</sub>O (0.4 mmol, 2.0 equiv) were weighted in a Schlenk tube equipped with a stir bar. Dry DMF (1.0 mL) was added and the mixture was stirred at 100 °C for 18 h under Ar atmosphere. Afterwards, it was diluted with CH<sub>2</sub>Cl<sub>2</sub> and transferred to a round bottom flask. Silica was added to the flask and volatiles were evaporated under reduced pressure. The purification was performed by flash column chromatography on silica gel with EtOAc /petroleum ether.

## 6. Experimental Data

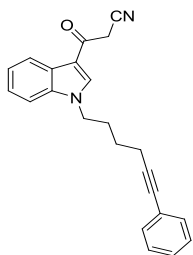

**3-Oxo-3-(1-(6-phenylhex-5-yn-1-yl)-1H-indol-3-yl)propanenitrile (1a):** White solid. M.p. 79 – 80 °C.  $^1\text{H NMR}$  (400 MHz,  $\text{CDCl}_3$ )  $\delta$  8.32 – 8.29 (m, 1H), 7.84 (s, 1H), 7.42 – 7.39 (m, 1H), 7.36 – 7.24 (m, 7H), 4.26 (t,  $J = 7.2$  Hz, 2H), 3.83 (s, 2H), 2.47 (t,  $J = 6.8$  Hz, 2H), 2.15 – 2.07 (m, 2H), 1.68 – 1.61 (m, 2H).  $^{13}\text{C NMR}$  (101 MHz,  $\text{CDCl}_3$ )  $\delta$  180.5, 136.8, 135.1, 131.5, 128.4, 127.9, 126.3, 124.2, 123.5, 122.5, 115.0, 114.4, 110.3, 88.9, 81.7, 47.0, 29.7, 28.9, 25.6, 19.0. **HRMS (ESI)** calcd for  $\text{C}_{23}\text{H}_{21}\text{N}_2\text{O}^+$   $[\text{M}+\text{H}]^+$  341.1654, found 341.1652.

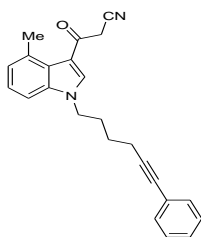

**3-(4-Methyl-1-(6-phenylhex-5-yn-1-yl)-1H-indol-3-yl)-3-oxopropanenitrile (1b):** light yellow oil.  $^1\text{H NMR}$  (400 MHz,  $\text{CDCl}_3$ )  $\delta$  7.77 (s, 1H), 7.38 – 7.36 (m, 2H), 7.30 – 7.22 (m, 5H), 7.09 – 7.07 (m, 1H), 4.25 (t,  $J = 7.2$  Hz, 2H), 3.87 (s, 2H), 2.84 (s, 3H), 2.49 (t,  $J = 6.8$  Hz, 2H), 2.07 – 2.14 (m, 2H), 1.70 – 1.62 (m, 2H).  $^{13}\text{C NMR}$  (101 MHz,  $\text{CDCl}_3$ )  $\delta$  180.0, 137.8, 136.4, 133.8, 131.6, 128.4, 127.9, 125.3, 125.1, 124.3, 123.6, 115.7, 115.4, 107.8, 89.1, 81.6, 77.5, 77.2, 76.9, 46.9, 30.5, 28.7, 25.6, 23.1, 18.9. **HRMS (ESI)** calcd for  $\text{C}_{24}\text{H}_{23}\text{N}_2\text{O}^+$   $[\text{M}+\text{H}]^+$  355.1810, found 355.1809.

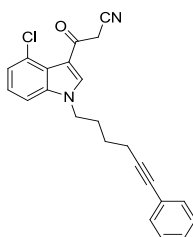

**3-(4-Chloro-1-(6-phenylhex-5-yn-1-yl)-1H-indol-3-yl)-3-oxopropanenitrile (1c):** White solid. M.p. 66 – 68 °C.  $^1\text{H NMR}$  (400 MHz,  $\text{CDCl}_3$ )  $\delta$  7.77 (s, 1H), 7.32 – 7.20 (m, 7H), 7.15 (t,  $J = 7.9$  Hz, 1H), 4.19 (t,  $J = 7.2$  Hz, 2H), 3.92 (d,  $J = 4.4$  Hz, 2H), 2.43 (t,  $J = 6.8$  Hz, 2H),

2.08 – 1.99 (m, 2H), 1.63 – 1.56 (m, 2H).  $^{13}\text{C}$  NMR (101 MHz,  $\text{CDCl}_3$ )  $\delta$  180.5, 138.7, 136.9, 131.5, 128.4, 127.9, 127.0, 124.6, 124.5, 123.6, 123.4, 115.2, 114.7, 109.3, 89.1, 81.6, 77.6, 77.2, 76.9, 47.1, 31.6, 28.6, 25.6, 18.9. **HRMS (ESI)** calcd for  $\text{C}_{23}\text{H}_{20}\text{ClN}_2\text{O}^+$   $[\text{M}+\text{H}]^+$  375.1264, found 375.1253.

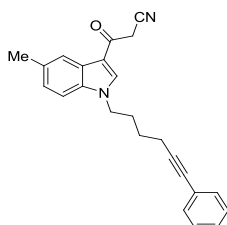

**3-(5-Methyl-1-(6-phenylhex-5-yn-1-yl)-1H-indol-3-yl)-3-oxopropanenitrile (1d):** White solid. M.p. 89 – 90 °C.  $^1\text{H}$  NMR (400 MHz,  $\text{CDCl}_3$ )  $\delta$  8.07 (s, 1H), 7.75 (s, 1H), 7.32 – 7.20 (m, 6H), 7.09 (d,  $J$  = 8.4 Hz, 1H), 4.18 (t,  $J$  = 7.1 Hz, 2H), 3.77 (s, 2H), 2.42 (d,  $J$  = 9.5 Hz, 5H), 2.09 – 2.02 (m, 2H), 1.63 – 1.57 (m, 2H).  $^{13}\text{C}$  NMR (101 MHz,  $\text{CDCl}_3$ )  $\delta$  180.5, 135.2, 134.9, 133.2, 131.5, 128.3, 127.9, 126.6, 125.6, 123.5, 122.2, 115.0, 114.0, 109.9, 88.8, 81.6, 47.0, 29.6, 28.8, 25.6, 21.5, 18.9. **HRMS (ESI)** calcd for  $\text{C}_{24}\text{H}_{23}\text{N}_2\text{O}^+$   $[\text{M}+\text{H}]^+$  355.1810, found 355.1806.

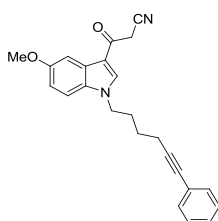

**3-(5-Methoxy-1-(6-phenylhex-5-yn-1-yl)-1H-indol-3-yl)-3-oxopropanenitrile (1e):** White solid. M.p. 76 – 78 °C.  $^1\text{H}$  NMR (400 MHz,  $\text{CDCl}_3$ )  $\delta$  7.77 (d,  $J$  = 2.5 Hz, 1H), 7.71 (s, 1H), 7.32 – 7.29 (m, 2H), 7.25 – 7.20 (m, 4H), 6.89 (dd,  $J$  = 8.9, 2.5 Hz, 1H), 4.16 (t,  $J$  = 7.2 Hz, 2H), 3.83 (s, 3H), 3.76 (s, 2H), 2.42 (t,  $J$  = 6.8 Hz, 2H), 2.08 – 2.01 (m, 2H), 1.62 – 1.55 (m, 2H).  $^{13}\text{C}$  NMR (101 MHz,  $\text{CDCl}_3$ )  $\delta$  180.4, 157.1, 134.7, 131.6, 131.5, 128.4, 127.9, 127.3, 123.5, 114.9, 114.7, 114.0, 111.1, 103.7, 88.8, 81.7, 55.8, 47.2, 29.5, 28.9, 25.6, 18.9. **HRMS (ESI)** calcd for  $\text{C}_{24}\text{H}_{23}\text{N}_2\text{O}_2^+$   $[\text{M}+\text{H}]^+$  371.1760, found 371.1757.

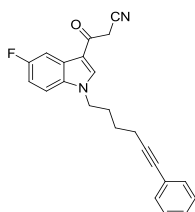

**3-(5-Fluoro-1-(6-phenylhex-5-yn-1-yl)-1H-indol-3-yl)-3-oxopropanenitrile (1f):** White solid. M.p. 115 – 117 °C.  $^1\text{H NMR}$  (400 MHz,  $\text{CDCl}_3$ )  $\delta$  8.02 – 7.99 (m, 1H), 7.99 – 7.87 (m, 1H), 7.36 – 7.25 (m, 6H), 7.08 – 7.04 (m, 1H), 4.26 (t,  $J = 6.1$  Hz, 2H), 3.82 – 3.81 (m, 2H), 2.52 – 2.49 (m, 2H), 2.14 – 2.11 (m, 2H), 1.68 – 1.65 (m, 2H).  $^{13}\text{C NMR}$  (101 MHz,  $\text{CDCl}_3$ )  $\delta$  180.4, 160.1 (d,  $J = 239.6$  Hz), 135.9, 133.2, 131.5, 128.4, 128.0, 127.1 (d,  $J = 11.1$  Hz), 123.4, 114.8, 114.2 (d,  $J = 4.3$  Hz), 112.6 (d,  $J = 26.5$  Hz), 111.2 (d,  $J = 9.7$  Hz), 108.0 (d,  $J = 25.1$  Hz), 88.8, 81.7, 47.3, 29.5, 28.8, 25.5, 18.9.  $^{19}\text{F NMR}$  (376 MHz,  $\text{CDCl}_3$ )  $\delta$  -119.27. **HRMS (ESI)** calcd for  $\text{C}_{23}\text{H}_{20}\text{FN}_2\text{O}^+$   $[\text{M}+\text{H}]^+$  359.1560, found 359.1557.

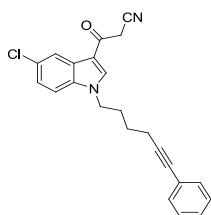

**3-(5-Chloro-1-(6-phenylhex-5-yn-1-yl)-1H-indol-3-yl)-3-oxopropanenitrile (1g):** White solid. M.p. 119 – 120 °C.  $^1\text{H NMR}$  (400 MHz,  $\text{CDCl}_3$ )  $\delta$  8.32 (d,  $J = 2.0$  Hz, 1H), 7.87 (s, 1H), 7.39 – 7.36 (m, 2H), 7.33 – 7.30 (m, 3H), 7.29 – 7.26 (m, 2H), 4.27 (s, 2H), 3.83 (s, 2H), 2.52 (t,  $J = 6.7$  Hz, 2H), 2.15 – 2.11 (m, 2H), 1.69 – 1.65 (m, 2H).  $^{13}\text{C NMR}$  (101 MHz,  $\text{CDCl}_3$ )  $\delta$  180.6, 135.9, 135.2, 131.5, 129.3, 128.4, 127.9, 127.3, 124.4, 123.5, 121.9, 114.9, 113.8, 111.4, 88.9, 81.7, 47.2, 29.6, 28.8, 25.6, 18.9. **HRMS (ESI)** calcd for  $\text{C}_{23}\text{H}_{20}\text{ClN}_2\text{O}^+$   $[\text{M}+\text{H}]^+$  375.1264, found 375.1254.

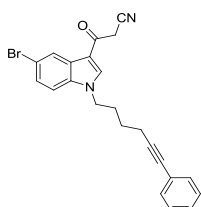

**3-(5-Bromo-1-(6-phenylhex-5-yn-1-yl)-1H-indol-3-yl)-3-oxopropanenitrile (1h):** White solid. M.p. 99 – 100 °C.  $^1\text{H NMR}$  (400 MHz,  $\text{CDCl}_3$ )  $\delta$  8.41 (d,  $J = 1.5$  Hz, 1H), 7.79 (s, 1H), 7.37 – 7.23 (m, 7H), 4.22 (t,  $J = 7.1$  Hz, 2H), 3.80 (s, 2H), 2.48 (t,  $J = 6.7$  Hz, 2H), 2.12 – 2.05 (m, 2H), 1.67 – 1.60 (m, 2H).  $^{13}\text{C NMR}$  (101 MHz,  $\text{CDCl}_3$ )  $\delta$  180.5, 135.7, 135.5, 131.5, 128.4, 127.9, 127.8, 127.1, 125.1, 123.5, 117.1, 114.8, 113.7, 111.7, 88.8, 81.7, 47.2, 29.6, 28.8, 25.6, 18.9. **HRMS (ESI)** calcd for  $\text{C}_{23}\text{H}_{20}\text{BrN}_2\text{O}^+$   $[\text{M}+\text{H}]^+$  419.0759, found 419.0751.



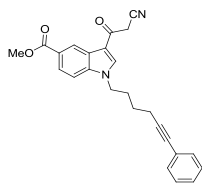

**Methyl 3-(2-cyanoacetyl)-1-(6-phenylhex-5-yn-1-yl)-1H-indole-5-carboxylate (1i):** White solid. M.p. 76 – 78 °C.  $^1\text{H NMR}$  (400 MHz,  $\text{CDCl}_3$ )  $\delta$  9.01 (d,  $J = 1.1$  Hz, 1H), 8.04 (dd,  $J = 8.7, 1.5$  Hz, 1H), 7.95 (s, 1H), 7.46 (d,  $J = 8.7$  Hz, 1H), 7.39 – 7.29 (m, 5H), 4.31 (t,  $J = 7.2$  Hz, 2H), 3.97 (s, 3H), 3.90 (s, 2H), 2.52 (t,  $J = 6.7$  Hz, 2H), 2.18 – 2.11 (m, 2H), 1.72 – 1.65 (m, 2H).  $^{13}\text{C NMR}$  (101 MHz,  $\text{CDCl}_3$ )  $\delta$  180.6, 167.5, 139.2, 136.3, 131.5, 128.4, 127.9, 125.8, 125.5, 125.4, 124.9, 123.4, 115.2, 114.7, 110.1, 88.8, 81.8, 52.2, 47.2, 29.8, 28.9, 25.6, 18.9. **HRMS (ESI)** calcd for  $\text{C}_{25}\text{H}_{23}\text{N}_2\text{O}_3^+$   $[\text{M}+\text{H}]^+$  399.1709, found 399.1704.

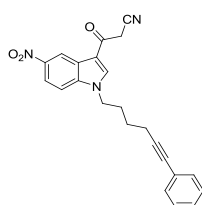

**3-(5-Nitro-1-(6-phenylhex-5-yn-1-yl)-1H-indol-3-yl)-3-oxopropanenitrile (1j):** White solid. M.p. 88 – 89 °C.  $^1\text{H NMR}$  (400 MHz,  $\text{CDCl}_3$ )  $\delta$  9.21 (d,  $J = 2.2$  Hz, 1H), 8.20 (dd,  $J = 9.1, 2.3$  Hz, 1H), 8.06 (s, 1H), 7.51 (d,  $J = 9.1$  Hz, 1H), 7.39 – 7.28 (m, 5H), 4.37 (t,  $J = 7.2$  Hz, 2H), 3.88 (s, 2H), 2.55 (t,  $J = 6.7$  Hz, 2H), 2.26 – 2.13 (m, 2H), 1.75 – 1.68 (m, 2H).  $^{13}\text{C NMR}$  (101 MHz,  $\text{CDCl}_3$ )  $\delta$  180.6, 144.3, 139.5, 137.5, 131.5, 128.4, 128.1, 125.7, 123.3, 119.6, 119.3, 115.7, 114.5, 110.5, 88.6, 81.9, 47.5, 29.8, 28.8, 25.4, 18.9. **HRMS (ESI)** calcd for  $\text{C}_{23}\text{H}_{20}\text{N}_3\text{O}_3^+$   $[\text{M}+\text{H}]^+$  386.1505, found 386.1499.

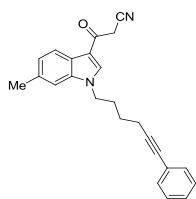

**3-(6-Methyl-1-(6-phenylhex-5-yn-1-yl)-1H-indol-3-yl)-3-oxopropanenitrile (1k):** White solid. M.p. 100 – 102 °C.  $^1\text{H NMR}$  (400 MHz,  $\text{CDCl}_3$ )  $\delta$  8.16 (d,  $J = 8.1$  Hz, 1H), 7.77 (s, 1H), 7.36 – 7.32 (m, 2H), 7.29 – 7.24 (m, 3H), 7.18 – 7.14 (m, 2H), 4.22 (t,  $J = 7.2$  Hz, 2H), 3.82 (s, 2H), 2.48 (t,  $J = 6.8$  Hz, 2H), 2.44 (s, 3H), 2.14 – 2.06 (m, 2H), 1.68 – 1.61 (m, 2H).  $^{13}\text{C NMR}$  (101 MHz,  $\text{CDCl}_3$ )  $\delta$  180.4, 137.2, 134.6, 134.8, 131.5, 128.3, 127.9, 125.2, 124.1, 123.5, 122.1, 114.9, 114.4, 110.1, 88.8, 81.7, 46.9, 29.6, 28.8, 25.6, 21.8, 18.9. **HRMS (ESI)** calcd for  $\text{C}_{24}\text{H}_{23}\text{N}_2\text{O}^+$   $[\text{M}+\text{H}]^+$  355.1810, found 355.1810.

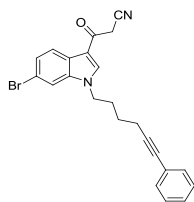

**3-(6-Bromo-1-(6-phenylhex-5-yn-1-yl)-1H-indol-3-yl)-3-oxopropanenitrile (1l):** Yellow solid. M.p. 135 – 136 °C.  $^1\text{H NMR}$  (400 MHz,  $\text{CDCl}_3$ )  $\delta$  8.22 – 8.20 (m, 1H), 7.84 (d,  $J = 4.4$  Hz, 1H), 7.59 (s, 1H), 7.46 – 7.29 (m, 6H), 4.26 – 4.23 (m, 2H), 3.86 (d,  $J = 4.5$  Hz, 2H), 2.53 (t,  $J = 6.4$  Hz, 2H), 2.14 (d,  $J = 6.8$  Hz, 2H), 1.69 (d,  $J = 6.3$  Hz, 2H).  $^{13}\text{C NMR}$  (101 MHz,  $\text{CDCl}_3$ )  $\delta$  180.5, 137.6, 135.3, 131.6, 128.4, 128.0, 126.8, 125.2, 123.9, 123.4, 117.9, 114.7, 114.4, 113.3, 88.7, 81.8, 47.2, 29.7, 28.8, 25.6, 19.0. **HRMS (ESI)** calcd for  $\text{C}_{23}\text{H}_{20}\text{BrN}_2\text{O}^+$   $[\text{M}+\text{H}]^+$  419.0759, found 419.0754.

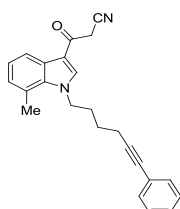

**3-(7-Methyl-1-(6-phenylhex-5-yn-1-yl)-1H-indol-3-yl)-3-oxopropanenitrile (1m):** White solid. M.p. 124 – 125 °C.  $^1\text{H NMR}$  (400 MHz,  $\text{CDCl}_3$ )  $\delta$  8.17 (d,  $J = 8.0$  Hz, 1H), 7.72 (s, 1H), 7.31 – 7.29 (m, 2H), 7.24 – 7.13 (m, 4H), 7.01 (d,  $J = 7.2$  Hz, 1H), 4.39 (t,  $J = 7.4$  Hz, 2H), 3.75 (s, 2H), 2.68 (s, 3H), 2.44 (t,  $J = 6.8$  Hz, 2H), 2.06 – 1.98 (m, 2H), 1.68 – 1.61 (m, 2H).  $^{13}\text{C NMR}$  (101 MHz,  $\text{CDCl}_3$ )  $\delta$  180.4, 136.6, 135.5, 131.5, 128.3, 127.9, 127.5, 127.4, 123.5, 121.4, 120.5, 114.9, 114.1, 88.9, 81.7, 49.5, 31.3, 29.6, 25.5, 19.7, 19.0. **HRMS (ESI)** calcd for  $\text{C}_{24}\text{H}_{23}\text{N}_2\text{O}^+$   $[\text{M}+\text{H}]^+$  355.1810, found 355.1809.

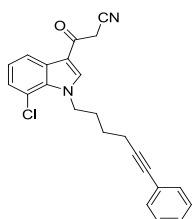

**3-(7-Chloro-1-(6-phenylhex-5-yn-1-yl)-1H-indol-3-yl)-3-oxopropanenitrile (1n):** White solid. M.p. 137 – 138 °C.  $^1\text{H NMR}$  (400 MHz,  $\text{CDCl}_3$ )  $\delta$  8.28 (dd,  $J = 7.9, 0.9$  Hz, 1H), 7.79 (s, 1H), 7.37 – 7.34 (m, 2H), 7.30 – 7.25 (m, 4H), 7.21 (t,  $J = 7.8$  Hz, 1H), 4.60 (t,  $J = 7.4$  Hz, 2H), 3.84 (s, 2H), 2.48 (t,  $J = 6.8$  Hz, 2H), 2.15 – 2.08 (m, 2H), 1.71 – 1.63 (m, 2H).  $^{13}\text{C NMR}$  (101 MHz,  $\text{CDCl}_3$ )  $\delta$  180.5, 137.5, 131.5, 129.4, 128.4, 127.9, 126.1, 124.2, 123.6,

121.3, 117.2, 114.7, 114.0, 89.1, 81.5, 49.8, 31.3, 29.8, 25.5, 19.1. **HRMS (ESI)** calcd for  $C_{23}H_{20}ClN_2O^+$   $[M+H]^+$  375.1264, found 375.1258.

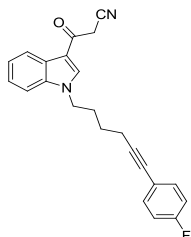

**3-(1-(6-(4-Fluorophenyl)hex-5-yn-1-yl)-1H-indol-3-yl)-3-oxopropanenitrile (1o):** White solid. M.p. 90 – 91 °C.  $^1H$  NMR (400 MHz,  $CDCl_3$ )  $\delta$  8.32 – (m, 1H), 7.85 (s, 1H), 7.43 – 7.31 (m, 5H), 7.06 – 6.89 (m, 2H), 4.26 (t,  $J = 6.6$  Hz, 2H), 3.86 (d,  $J = 1.2$  Hz, 2H), 2.47 (t,  $J = 6.2$  Hz, 2H), 2.14 – 2.07 (m, 2H), 1.69 – 1.62 (m, 2H).  $^{13}C$  NMR (101 MHz,  $CDCl_3$ )  $\delta$  180.5, 162.2 (d,  $J = 248.8$  Hz), 136.8, 135.0, 133.3 (d,  $J = 8.2$  Hz), 126.3, 124.2, 123.5, 122.5, 119.5, 115.5 (d,  $J = 22.2$  Hz), 114.9, 114.4, 110.2, 88.4, 80.6, 47.0, 29.7, 28.9, 25.7, 18.9.  $^{19}F$  NMR (376 MHz,  $CDCl_3$ )  $\delta$  -111.53, **HRMS (ESI)** calcd for  $C_{23}H_{20}FN_2O^+$   $[M+H]^+$  359.1560, found 359.1557.

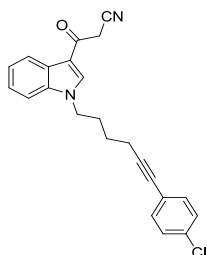

**3-(1-(6-(4-Chlorophenyl)hex-5-yn-1-yl)-1H-indol-3-yl)-3-oxopropanenitrile (1p):** White solid. M.p. 130 – 131 °C.  $^1H$  NMR (400 MHz,  $CDCl_3$ )  $\delta$  8.32 – 8.30 (m, 1H), 7.84 (s, 1H), 7.42 – 7.39 (m, 1H), 7.36 – 7.31 (m, 2H), 7.28 – 7.23 (m, 4H), 4.25 (t,  $J = 7.1$  Hz, 2H), 3.86 (s, 2H), 2.47 (t,  $J = 6.8$  Hz, 2H), 2.13 – 2.06 (m, 2H), 1.69 – 1.61 (m, 2H).  $^{13}C$  NMR (101 MHz,  $CDCl_3$ )  $\delta$  180.6, 136.8, 135.2, 133.8, 132.8, 128.6, 126.3, 124.1, 123.4, 122.5, 115.0, 114.3, 110.3, 90.0, 80.6, 47.0, 29.7, 28.9, 25.7, 19.0. **HRMS (ESI)** calcd for  $C_{23}H_{20}ClN_2O^+$   $[M+H]^+$  375.1264, found 375.1266.

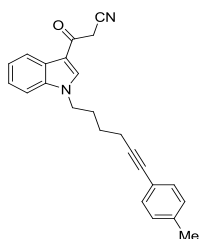

**3-(1-(6-(4-Methylphenyl)hex-5-yn-1-yl)-1H-indol-3-yl)-3-oxopropanenitrile (1q):** White solid. M.p. 91 – 93 °C.  $^1\text{H NMR}$  (400 MHz,  $\text{CDCl}_3$ )  $\delta$  8.36 – 8.34 (m, 1H), 7.87 (s, 1H), 7.47 – 7.44 (m, 1H), 7.39 – 7.36 (m, 2H), 7.30 – 7.28 (m, 2H), 7.13 (d,  $J = 7.9$  Hz, 2H), 4.30 (t,  $J = 7.2$  Hz, 2H), 3.86 (s, 2H), 2.51 (t,  $J = 6.7$  Hz, 2H), 2.37 (s, 3H), 2.19 – 2.12 (m, 2H), 1.72 – 1.65 (m, 2H).  $^{13}\text{C NMR}$  (101 MHz,  $\text{CDCl}_3$ )  $\delta$  180.5, 159.3, 136.9, 134.9, 132.9, 126.4, 124.2, 123.5, 122.6, 115.6, 114.9, 114.4, 114.0, 110.2, 87.2, 81.5, 55.3, 47.0, 29.7, 28.9, 25.7, 18.9. **HRMS (ESI)** calcd for  $\text{C}_{24}\text{H}_{23}\text{N}_2\text{O}^+$   $[\text{M}+\text{H}]^+$  355.1810, found 355.1807.

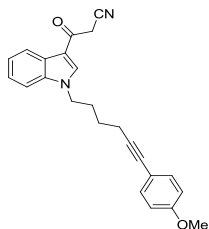

**3-(1-(6-(4-Methoxyphenyl)hex-5-yn-1-yl)-1H-indol-3-yl)-3-oxopropanenitrile (1r):** White solid. M.p. 91 – 93 °C.  $^1\text{H NMR}$  (400 MHz,  $\text{CDCl}_3$ )  $\delta$  8.23 (d,  $J = 8.5$  Hz, 1H), 7.82 (s, 1H), 7.39 (d,  $J = 1.6$  Hz, 1H), 7.27 – 7.30 (m, 3H), 6.81 – 6.79 (m, 2H), 4.21 (t,  $J = 7.2$  Hz, 2H), 3.80 – 3.78 (m, 5H), 2.46 (t,  $J = 6.7$  Hz, 2H), 2.13 – 2.05 (m, 2H), 1.66 – 1.59 (m, 2H).  $^{13}\text{C NMR}$  (101 MHz,  $\text{CDCl}_3$ )  $\delta$  180.5, 159.3, 136.9, 134.9, 132.9, 126.4, 124.2, 123.5, 122.6, 115.6, 114.9, 114.4, 113.9, 110.2, 87.2, 81.5, 55.3, 46.9, 29.6, 28.8, 25.6, 18.9. **HRMS (ESI)** calcd for  $\text{C}_{24}\text{H}_{23}\text{N}_2\text{O}_2^+$   $[\text{M}+\text{H}]^+$  371.1760, found 371.1760.

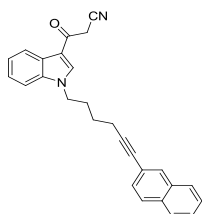

**3-(1-(6-(Naphthalen-2-yl)hex-5-yn-1-yl)-1H-indol-3-yl)-3-oxopropanenitrile (1s):** Yellow solid. M.p. 67 – 68 °C.  $^1\text{H NMR}$  (400 MHz,  $\text{CDCl}_3$ )  $\delta$  8.34 – 8.32 (m, 1H), 7.88 – 7.75 (m, 5H), 7.49 – 7.31 (m, 6H), 4.31 – 4.27 (m, 2H), 3.84 (d,  $J = 2.0$  Hz, 2H), 2.55 (t,  $J = 6.7$  Hz, 2H), 2.18 – 2.15 (m, 2H), 1.67 – 1.74 (m, 2H).  $^{13}\text{C NMR}$  (101 MHz,  $\text{CDCl}_3$ )  $\delta$  180.5, 136.8, 134.9, 133.0, 132.6, 131.2, 128.5, 128.0, 127.8, 127.6, 126.6, 126.5, 126.4, 124.2, 123.5, 122.6, 120.8, 114.9, 114.4, 110.3, 89.2, 82.1, 47.1, 29.7, 28.9, 25.7, 19.1. **HRMS (ESI)** calcd for  $\text{C}_{27}\text{H}_{23}\text{N}_2\text{O}^+$   $[\text{M}+\text{H}]^+$  391.1810, found 391.1803.

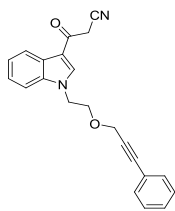

**3-Oxo-3-(1-(2-((3-phenylprop-2-yn-1-yl)oxy)ethyl)-1H-indol-3-yl)propanenitrile (1t):**

Yellow solid M.p. 67 – 68 °C. <sup>1</sup>H NMR (400 MHz, CDCl<sub>3</sub>) δ 8.27 – 8.25 (m, 1H), 7.78 (s, 1H), 7.37 – 7.34 (m, 1H), 7.32 – 7.24 (m, 7H), 4.32 – 4.30 (m, 4H), 3.92 (t, *J* = 5.0 Hz, 2H), 3.73 (s, 2H). <sup>13</sup>C NMR (101 MHz, CDCl<sub>3</sub>) δ 180.9, 136.9, 136.4, 131.7, 128.8, 128.5, 126.2, 124.1, 123.3, 122.3, 122.1, 115.1, 114.3, 110.3, 86.9, 84.5, 67.7, 59.3, 47.0, 29.6. HRMS (ESI) calcd for C<sub>22</sub>H<sub>19</sub>N<sub>2</sub>O<sub>2</sub><sup>+</sup>[M+H]<sup>+</sup>: 343.1447, found 343.1441.

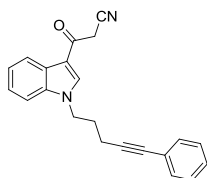

**3-Oxo-3-(1-(5-phenylpent-4-yn-1-yl)-1H-indol-3-yl)propanenitrile (1u):** White solid. M.p. 126 – 128 °C. <sup>1</sup>H NMR (400 MHz, CDCl<sub>3</sub>) δ 8.33 – 8.31 (m, 1H), 7.89 (s, 1H), 7.48 – 7.26 (m, 8H), 4.42 (t, *J* = 6.8 Hz, 2H), 3.85 (s, 2H), 2.46 (t, *J* = 6.6 Hz, 2H), 2.22 – 2.15 (m, 2H). <sup>13</sup>C NMR (101 MHz, CDCl<sub>3</sub>) δ 180.5, 136.8, 135.4, 131.6, 128.5, 128.2, 126.4, 124.2, 123.5, 123.2, 122.6, 114.9, 114.4, 110.2, 87.5, 82.6, 46.0, 29.7, 28.3, 16.8. HRMS (ESI) calcd for C<sub>22</sub>H<sub>19</sub>N<sub>2</sub>O<sup>+</sup> [M+H]<sup>+</sup> 327.1497, found 327.1498.

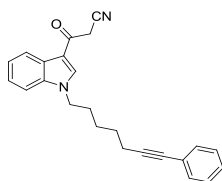

**3-Oxo-3-(1-(7-phenylhept-6-yn-1-yl)-1H-indol-3-yl)propanenitrile (1v):** Yellow solid. M.p. 67 – 68 °C. <sup>1</sup>H NMR (400 MHz, CDCl<sub>3</sub>) δ 8.28 – 8.26 (m, 1H), 7.76 – 7.74 (m, 1H), 7.36 – 7.21 (m, 8H), 4.16 (t, *J* = 6.2 Hz, 2H), 3.74 (s, 2H), 2.38 (t, *J* = 6.7 Hz, 2H), 1.94 – 1.90 (m, 2H), 1.64 – 1.47 (m, 4H). <sup>13</sup>C NMR (101 MHz, CDCl<sub>3</sub>) δ 180.5, 136.8, 135.0, 131.5, 128.3, 127.8, 126.3, 124.1, 123.7, 123.4, 122.6, 114.9, 114.3, 110.2, 89.4, 81.2, 47.3, 29.6, 29.3, 28.0, 26.0. HRMS (ESI) calcd for C<sub>24</sub>H<sub>23</sub>N<sub>2</sub>O<sup>+</sup> [M+H]<sup>+</sup> 355.1810, found 355.1803.

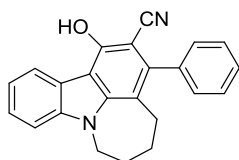

**1-Hydroxy-3-phenyl-4,5,6,7-tetrahydroazepino[3,2,1-jk]carbazole-2-carbonitrile (2a):** white solid (62.2 mg, 92%). M.p. 287 – 289 °C. <sup>1</sup>H NMR (400 MHz, DMSO-*d*<sub>6</sub>) δ 10.86 (s, 1H), 8.29 (d, *J* = 7.7 Hz, 1H), 7.65 (d, *J* = 8.3 Hz, 1H), 7.48-7.53 (m, *J* = 14.3, 4H), 7.35 (d, *J* = 6.9 Hz, 2H), 7.27 (t, *J* = 7.5 Hz, 1H), 4.51 – 4.53 (m, 2H), 2.80 – 2.83 (m, 2H), 2.12 (s, 2H), 1.91 – 1.94 (m, 2H). <sup>13</sup>C NMR (101 MHz, DMSO-*d*<sub>6</sub>) δ 154.8, 144.5, 140.8, 140.5, 138.6, 129.7, 128.2, 127.8, 125.5, 122.4, 121.0, 120.0, 117.8, 117.7, 111.7, 109.6, 91.9, 43.1, 27.2, 26.4, 25.9. HRMS (ESI) calcd for C<sub>23</sub>H<sub>19</sub>N<sub>2</sub>O<sup>+</sup> [M+H]<sup>+</sup> 339.1497, found 339.1493.

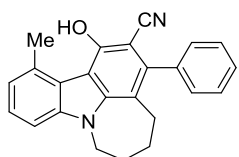

**1-Hydroxy-12-methyl-3-phenyl-4,5,6,7-tetrahydroazepino[3,2,1-jk]carbazole-2-carbonitrile (2b):** white solid (60.5 mg, 86%). M.p. 255 – 257 °C. <sup>1</sup>H NMR (400 MHz, DMSO-*d*<sub>6</sub>) δ 10.50 (s, 1H), 7.53 – 7.46 (m, 4H), 7.34 (t, *J* = 6.9 Hz, 3H), 7.03 (d, *J* = 7.2 Hz, 1H), 4.53 (d, *J* = 5.2 Hz, 2H), 2.95 (s, 3H), 2.82 (d, *J* = 5.2 Hz, 2H), 2.10 (s, 2H), 1.92 (s, 2H). <sup>13</sup>C NMR (101 MHz, DMSO-*d*<sub>6</sub>) δ 153.9, 144.9, 141.7, 140.4, 138.4, 132.8, 129.7, 128.2, 127.8, 125.8, 122.9, 120.3, 118.1, 117.7, 112.9, 107.3, 93.1, 42.8, 26.8, 25.9, 25.6, 24.0. HRMS (ESI) calcd for C<sub>24</sub>H<sub>21</sub>N<sub>2</sub>O<sup>+</sup> [M+H]<sup>+</sup> 353.1654, found 353.1645.

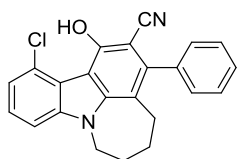

**12-Chloro-1-hydroxy-3-phenyl-4,5,6,7-tetrahydroazepino[3,2,1-jk]carbazole-2-carbonitrile (2c):** white solid (60.3 mg, 81%). M.p. 276 – 278 °C. <sup>1</sup>H NMR (400 MHz, DMSO-*d*<sub>6</sub>) 11.08 (s, 1H), 8.38 (d, *J* = 1.8 Hz, 1H), 7.67 – 7.61 (m, 2H), 7.59 – 7.45 (m, 3H), 7.34 (d, *J* = 6.7 Hz, 2H), 4.53 – 4.50 (m, 2H), 2.82 – 2.79 (m, 2H), 2.11 (s, 2H), 1.93 – 1.90 (m, 2H). <sup>13</sup>C NMR (101 MHz, DMSO-*d*<sub>6</sub>) δ 155.5, 145.2, 141.7, 140.1, 138.8, 130.1, 128.8, 128.4, 124.7, 123.2, 118.5, 118.1, 112.4, 111.2, 92.6, 43.8, 27.5, 26.8, 26.2. HRMS (ESI) calcd for C<sub>23</sub>H<sub>18</sub>ClN<sub>2</sub>O<sup>+</sup> [M+H]<sup>+</sup> 373.1108, found 373.1099.

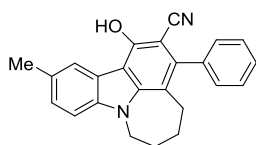

**1-Hydroxy-11-methyl-3-phenyl-4,5,6,7-tetrahydroazepino[3,2,1-jk]carbazole-2-carbonitrile (2d):** white solid (61.9 mg, 88%). M.p. 252 – 252 °C. <sup>1</sup>H NMR (400 MHz, DMSO-*d*<sub>6</sub>) δ 10.76 (s, 1H), 8.08 (s, 1H), 7.55 – 7.45 (m, 4H), 7.35 – 7.28 (m, 3H), 4.48 (s, 2H), 2.80 (s, 2H), 2.11 (s, 2H), 1.92 (s, 2H). <sup>13</sup>C NMR (101 MHz, DMSO-*d*<sub>6</sub>) δ 154.9, 144.6, 140.2, 139.2, 138.6, 129.6, 128.8, 128.2, 127.8, 126.8, 122.2, 121.1, 117.8, 111.4, 109.4, 91.5, 43.1, 27.2, 26.4, 25.8, 21.1. HRMS (ESI) calcd for C<sub>24</sub>H<sub>21</sub>N<sub>2</sub>O<sup>+</sup> [M+H]<sup>+</sup> 353.1654, found 353.1648.

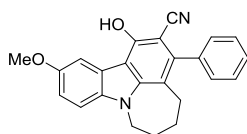

**1-Hydroxy-11-methoxy-3-phenyl-4,5,6,7-tetrahydroazepino[3,2,1-jk]carbazole-2-carbonitrile (2e):** white solid (59.6 mg, 81%). M.p. 250 – 252 °C. <sup>1</sup>H NMR (400 MHz, DMSO-*d*<sub>6</sub>) δ 10.77 (s, 1H), 7.80 (s, 1H), 7.57 (d, *J* = 9.0 Hz, 1H), 7.52 – 7.43 (m, 3H), 7.34 (d, *J* = 7.7 Hz, 2H), 7.13 – 7.10 (m, 1H), 4.49 – 4.46 (m, 2H), 3.85 (s, 3H), 2.81 – 2.78 (m, 2H), 2.11 (s, 2H), 1.93 – 1.90 (m, 2H). <sup>13</sup>C NMR (101 MHz, DMSO-*d*<sub>6</sub>) δ 155.4, 154.3, 145.4, 140.7, 139.1, 136.3, 130.2, 128.7, 128.3, 121.9, 118.3, 118.2, 114.8, 111.9, 110.9, 105.8, 91.8, 56.1, 43.8, 27.7, 27.0, 26.4. HRMS (ESI) calcd for C<sub>24</sub>H<sub>21</sub>N<sub>2</sub>O<sub>2</sub><sup>+</sup> [M+H]<sup>+</sup> 369.1603, found 369.1592.

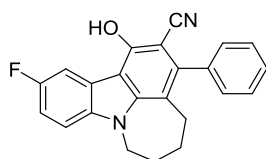

**11-Fluoro-1-hydroxy-3-phenyl-4,5,6,7-tetrahydroazepino[3,2,1-jk]carbazole-2-carbonitrile (2f):** white solid (60.5 mg, 85%). M.p. 290 – 292 °C. <sup>1</sup>H NMR (400 MHz, DMSO-*d*<sub>6</sub>) δ 11.01 (s, 1H), 7.96 – 7.99 (m, 1H), 7.72 – 7.68 (m, 1H), 7.53 – 7.46 (m, 3H), 7.34 (d, *J* = 6.4 Hz, 3H), 4.53 (s, 2H), 2.82 – 2.79 (m, 2H), 2.12 (s, 2H), 1.92 (s, 2H). <sup>13</sup>C NMR (101 MHz, DMSO-*d*<sub>6</sub>) δ 157.4 (d, *J* = 234.0 Hz), 155.6, 145.7, 141.4, 138.9, 137.9, 130.1, 128.7, 128.3, 121.7 (d, *J* = 10.5 Hz), 118.2 (d, *J* = 29.2 Hz), 113.5 (d, *J* = 25.2 Hz), 111.8, 111.3 (d, *J* = 9.3 Hz), 107.6 (*J* = 24.6 Hz), 92.2, 43.9, 27.6, 26.9, 26.3. <sup>19</sup>F NMR (376

**MHz, DMSO-*d*<sub>6</sub>**)  $\delta$  -118.33. **HRMS (ESI)** calcd for C<sub>23</sub>H<sub>18</sub>FN<sub>2</sub>O<sup>+</sup> [M+H]<sup>+</sup> 357.1403, found 357.1392.

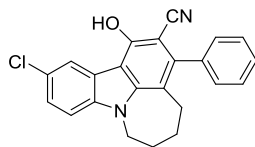

**11-Chloro-1-hydroxy-3-phenyl-4,5,6,7-tetrahydroazepino[3,2,1-jk]carbazole-2-carbonitrile (2g):** white solid (57.3 mg, 77%). M.p. 267 – 269 °C. **<sup>1</sup>H NMR (400 MHz, DMSO-*d*<sub>6</sub>)**  $\delta$  11.07 (s, 1H), 8.24 (d, *J* = 2.0 Hz, 1H), 7.72 (d, *J* = 8.8 Hz, 1H), 7.52 – 7.46 (m, 4H), 7.36 – 7.34 (m, 2H), 4.54 – 4.52 (m, 2H), 2.82 – 2.79 (m, 2H), 2.12 (s, 2H), 1.94 – 1.91 (m, 2H). **<sup>13</sup>C NMR (101 MHz, DMSO-*d*<sub>6</sub>)**  $\delta$  154.9, 144.9, 141.2, 139.3, 138.3, 129.6, 128.3, 127.9, 125.3, 124.2, 122.0, 121.3, 118.0, 117.5, 111.4, 110.8, 92.1, 43.3, 27.0, 26.3, 25.7. **HRMS (ESI)** calcd for C<sub>23</sub>H<sub>18</sub>ClN<sub>2</sub>O<sup>+</sup> [M+H]<sup>+</sup> 373.1108, found 373.1097.

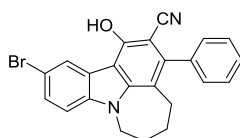

**11-Bromo-1-hydroxy-3-phenyl-4,5,6,7-tetrahydroazepino[3,2,1-jk]carbazole-2-carbonitrile (2h):** white solid (70.2 mg, 84%). M.p. 276 – 278 °C. **<sup>1</sup>H NMR (400 MHz, DMSO-*d*<sub>6</sub>)**  $\delta$  11.11 (s, 1H), 8.38 (d, *J* = 1.4 Hz, 1H), 7.68 – 7.60 (m, 2H), 7.53 – 7.45 (m, 3H), 7.35 (d, *J* = 6.9 Hz, 2H), 4.54 – 4.51 (m, 2H), 2.82 – 2.79 (m, 2H), 2.12 (s, 2H), 1.94 – 1.91 (m, 2H). **<sup>13</sup>C NMR (101 MHz, DMSO-*d*<sub>6</sub>)**  $\delta$  155.0, 144.8, 141.2, 139.6, 138.4, 129.6, 128.3, 127.9, 124.3, 122.7, 118.0, 117.5, 112.1, 112.0, 111.9, 110.7, 92.2, 43.3, 27.0, 26.3, 25.7. C<sub>23</sub>H<sub>18</sub>BrN<sub>2</sub>O<sup>+</sup> [M+H]<sup>+</sup> 417.0603, found 417.0597.

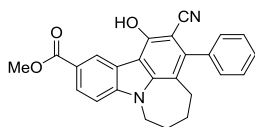

**Methyl 2-cyano-1-hydroxy-3-phenyl-5,6-dihydro-4H-pyrido[3,2,1-jk]carbazole-10-carboxylate (2i):** white solid (56.2 mg, 71%). M.p. 285 – 286 °C. **<sup>1</sup>H NMR (400 MHz, DMSO-*d*<sub>6</sub>)**  $\delta$  11.13 (s, 1H), 8.91 (s, 1H), 8.08 (d, *J* = 4.9 Hz, 1H), 7.74 – 7.76 (m, 1H), 7.51 (d, *J* = 5.6 Hz, 3H), 7.36 (s, 2H), 4.58 (s, 2H), 3.92 (d, *J* = 3.1 Hz, 3H), 2.82 (s, 2H), 2.14 (s, 2H), 1.97 (d, *J* = 21.6 Hz, 2H). **<sup>13</sup>C NMR (101 MHz, DMSO-*d*<sub>6</sub>)**  $\delta$  167.2, 155.5, 145.6, 143.9, 141.9, 138.7, 130.1, 128.8, 128.5, 127.1, 124.7, 121.7, 121.3, 118.8, 118.0, 112.2, 110.1, 93.2,



52.4, 43.7, 27.3, 26.6, 26.2. **HRMS (ESI)** calcd for  $C_{25}H_{21}N_2O_3^+$   $[M+H]^+$  397.1552, found 397.1546.

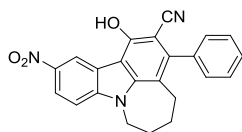

**1-Hydroxy-11-nitro-3-phenyl-4,5,6,7-tetrahydroazepino[3,2,1-jk]carbazole-2-carbonitrile (2j):** yellow solid (67.4 mg, 88%). M.p. >300 °C.  **$^1H$  NMR (400 MHz, DMSO- $d_6$ )**  $\delta$  11.45 (s, 1H), 9.09 (s, 1H), 8.36 (d,  $J = 9.1$  Hz, 1H), 7.88 (d,  $J = 9.3$  Hz, 1H), 7.53 – 7.49 (m, 3H), 7.37 (d,  $J = 7.1$  Hz, 2H), 4.64 (s, 2H), 2.84 (s, 2H), 2.15 (s, 2H), 1.94 (s, 2H).  **$^{13}C$  NMR (101 MHz, DMSO- $d_6$ )**  $\delta$  155.0, 145.6, 143.9, 142.3, 140.5, 138.0, 129.5, 128.3, 128.1, 121.0, 120.5, 118.6, 118.2, 117.2, 111.5, 110.0, 93.3, 43.5, 26.6, 25.9, 25.5. **HRMS (ESI)** calcd for  $C_{23}H_{18}N_3O_3^+$   $[M+H]^+$  384.1348, found 384.1340.

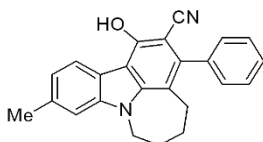

**1-Hydroxy-10-methyl-3-phenyl-4,5,6,7-tetrahydroazepino[3,2,1-jk]carbazole-2-carbonitrile (2k):** white solid (64.8 mg, 92%). M.p. 264 – 266 °C.  **$^1H$  NMR (400 MHz, DMSO- $d_6$ )**  $\delta$  10.73 (s, 1H), 8.14 (d,  $J = 7.9$  Hz, 1H), 7.52 – 7.43 (m, 4H), 7.34 (d,  $J = 6.8$  Hz, 2H), 7.09 (d,  $J = 7.9$  Hz, 1H), 4.50 – 4.48 (m, 2H), 2.82 – 2.79 (m, 2H), 2.51 (s, 3H), 2.11 (s, 2H), 1.92 (s, 2H).  **$^{13}C$  NMR (101 MHz, DMSO- $d_6$ )**  $\delta$  154.9, 144.9, 141.7, 140.5, 139.1, 135.7, 130.2, 128.7, 128.3, 122.5, 122.0, 119.2, 118.3, 118.2, 112.3, 110.2, 92.3, 43.4, 27.6, 26.8, 26.4, 22.2. **HRMS (ESI)** calcd for  $C_{24}H_{21}N_2O^+$   $[M+H]^+$  353.1654, found 353.1655.

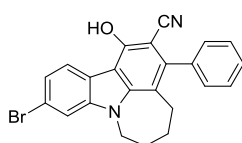

**10-Bromo-1-hydroxy-3-phenyl-4,5,6,7-tetrahydroazepino[3,2,1-jk]carbazole-2-carbonitrile (2l):** white solid (70.2 mg, 84%). M.p. 278 – 279 °C.  **$^1H$  NMR (400 MHz, DMSO- $d_6$ )**  $\delta$  11.01 (s, 1H), 8.18 (d,  $J = 8.3$  Hz, 1H), 7.96 (s, 1H), 7.53 – 7.46 (m, 3H), 7.41 (d,  $J = 8.2$  Hz, 1H), 7.34 (d,  $J = 7.0$  Hz, 2H), 4.53 (s, 2H), 2.81 (s, 2H), 2.11 (s, 2H), 1.92 (s, 2H).  **$^{13}C$  NMR (101 MHz, DMSO- $d_6$ )**  $\delta$  154.8, 144.7, 141.8, 141.1, 138.4, 129.6, 128.3, 127.9, 123.8, 122.8, 120.1, 118.6, 118.0, 117.5, 112.7, 111.3, 92.4, 43.2, 26.9, 26.2, 25.7. **HRMS (ESI)** calcd for  $C_{23}H_{18}BrN_2O^+$   $[M+H]^+$  417.0603, found 417.0591.

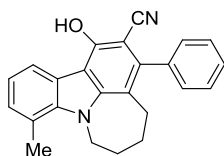

**1-Hydroxy-9-methyl-3-phenyl-4,5,6,7-tetrahydroazepino[3,2,1-jk]carbazole-2-carbonitrile (2m):** white solid (58.4 mg, 83%). M.p. 279 – 280 °C.  $^1\text{H NMR}$  (400 MHz,  $\text{DMSO-}d_6$ )  $\delta$  10.79 (s, 1H), 8.13 (d,  $J = 7.5$  Hz, 1H), 7.51 – 7.46 (m, 5H), 7.22 – 7.13 (m, 2H), 4.62 (s, 2H), 2.77 (s, 2H), 2.74 (s, 3H), 2.10 (s, 2H), 1.90 (s, 2H).  $^{13}\text{C NMR}$  (101 MHz,  $\text{DMSO-}d_6$ )  $\delta$  154.6, 146.6, 140.8, 140.6, 138.5, 129.7, 128.8, 128.2, 127.8, 122.2, 120.8, 120.4, 120.4, 117.9, 117.7, 112.3, 92.3, 45.2, 27.7, 26.4, 25.2, 19.9. **HRMS (ESI)** calcd for  $\text{C}_{24}\text{H}_{21}\text{N}_2\text{O}^+ [\text{M}+\text{H}]^+$  353.1654, found 353.1655.

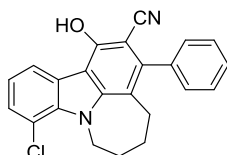

**9-Chloro-1-hydroxy-3-phenyl-4,5,6,7-tetrahydroazepino[3,2,1-jk]carbazole-2-carbonitrile (2n):** white solid (59.5 mg, 80%). M.p. >300 °C.  $^1\text{H NMR}$  (400 MHz,  $\text{DMSO-}d_6$ )  $\delta$  11.15 (s, 1H), 8.26 (d,  $J = 7.7$  Hz, 1H), 7.54 – 7.47 (m, 4H), 7.38 (d,  $J = 7.2$  Hz, 2H), 7.25 – 7.29 (m, 1H), 4.84 (s, 2H), 2.77 (s, 2H), 2.12 (s, 2H), 1.90 (s, 2H).  $^{13}\text{C NMR}$  (101 MHz,  $\text{DMSO-}d_6$ )  $\delta$  154.8, 146.8, 141.7, 138.2, 136.8, 129.7, 128.3, 128.0, 127.4, 124.8, 121.5, 118.4, 117.4, 115.4, 111.8, 93.1, 44.9, 27.3, 26.3, 24.9. **HRMS (ESI)** calcd for  $\text{C}_{23}\text{H}_{18}\text{ClN}_2\text{O}^+ [\text{M}+\text{H}]^+$  373.1108, found 373.1097.

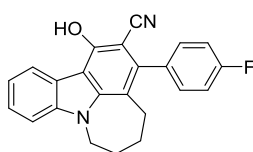

**3-(4-Fluorophenyl)-1-hydroxy-4,5,6,7-tetrahydroazepino[3,2,1-jk]carbazole-2-carbonitrile(2o) :** white solid (62.6 mg, 88%). M.p. >300 °C.  $^1\text{H NMR}$  (400 MHz,  $\text{DMSO-}d_6$ )  $\delta$  10.87 (s, 1H), 8.28 (d,  $J = 7.7$  Hz, 1H), 7.66 (d,  $J = 8.3$  Hz, 1H), 7.50 – 7.25 (m, 6H), 4.53 (s, 2H), 2.81 (d,  $J = 5.1$  Hz, 2H), 2.13 (s, 2H), 1.94 (s, 2H).  $^{13}\text{C NMR}$  (101 MHz,  $\text{DMSO-}d_6$ )  $\delta$  161.8 (d,  $J = 244.6$  Hz), 154.8, 144.4, 140.8, 139.3, 134.8, 131.78 (d,  $J = 8.3$  Hz), 125.6 (s), 122.4, 120.9, 120.1, 118.0, 117.7, 115.1 (d,  $J = 21.5$  Hz), 111.74, 109.7, 91.8, 43.0, 27.1, 26.4, 25.8.  $^{19}\text{F NMR}$  (376 MHz,  $\text{DMSO-}d_6$ )  $\delta$  -109.27. **HRMS (ESI)** calcd for  $\text{C}_{23}\text{H}_{18}\text{FN}_2\text{O}^+ [\text{M}+\text{H}]^+$  357.1403, found 357.1397.

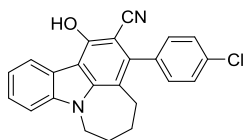

**3-(4-Chlorophenyl)-1-hydroxy-4,5,6,7-tetrahydroazepino[3,2,1-jk]carbazole-2-carbonitrile (2p):** white solid (52.1 mg, 70%). M.p. >300 °C.  $^1\text{H NMR}$  (400 MHz,  $\text{DMSO-}d_6$ )  $\delta$  10.92 (s, 1H), 8.28 (d,  $J = 7.8$  Hz, 1H), 7.67 (d,  $J = 8.3$  Hz, 1H), 7.58 (d,  $J = 8.3$  Hz, 2H), 7.48 (t,  $J = 7.7$  Hz, 1H), 7.39 (d,  $J = 8.3$  Hz, 2H), 7.27 (t,  $J = 7.5$  Hz, 1H), 4.54 – 4.52 (m, 2H), 2.83 – 2.80 (m, 2H), 2.13 (s, 2H), 1.99 – 1.94 (m, 2H).  $^{13}\text{C NMR}$  (101 MHz,  $\text{DMSO-}d_6$ )  $\delta$  154.9, 144.4, 140.8, 139.0, 137.4, 132.8, 131.6, 128.3, 125.6, 122.4, 120.9, 120.1, 117.9, 117.7, 111.8, 109.7, 91.5, 43.0, 27.1, 26.4, 25.8. **HRMS (ESI)** calcd for  $\text{C}_{23}\text{H}_{18}\text{ClN}_2\text{O}^+$   $[\text{M}+\text{H}]^+$  373.1108, found 373.1101.

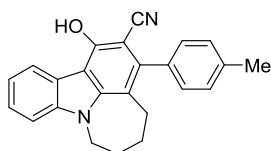

**1-Hydroxy-3-(p-tolyl)-4,5,6,7-tetrahydroazepino[3,2,1-jk]carbazole-2-carbonitrile (2q):** white solid (50.1 mg, 71%). M.p. 286 – 288 °C.  $^1\text{H NMR}$  (400 MHz,  $\text{DMSO-}d_6$ )  $\delta$  10.81 (s, 1H), 8.28 (d,  $J = 7.7$  Hz, 1H), 7.66 (d,  $J = 8.3$  Hz, 1H), 7.47 (t,  $J = 7.4$  Hz, 1H), 7.32 – 7.22 (m, 5H), 4.54 – 4.51 (m, 2H), 2.84 – 2.81 (m, 2H), 2.40 (s, 3H), 2.13 (s, 2H), 1.94 – 1.91 (m, 2H).  $^{13}\text{C NMR}$  (101 MHz,  $\text{DMSO-}d_6$ )  $\delta$  154.8, 144.5, 140.8, 140.5, 137.0, 135.6, 129.5, 128.8, 125.5, 122.3, 121.0, 120.0, 117.8, 111.6, 109.6, 92.0, 43.1, 27.1, 26.4, 25.9, 20.8. **HRMS (ESI)** calcd for  $\text{C}_{24}\text{H}_{21}\text{N}_2\text{O}^+$   $[\text{M}+\text{H}]^+$  353.1654, found 353.1653.

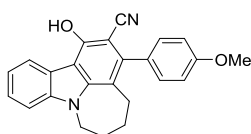

**1-Hydroxy-3-(4-methoxyphenyl)-4,5,6,7-tetrahydroazepino[3,2,1-jk]carbazole-2-carbonitrile (2r):** white solid (65.5 mg, 89%). M.p. 294 – 296 °C.  $^1\text{H NMR}$  (400 MHz,  $\text{DMSO-}d_6$ )  $\delta$  10.79 (s, 1H), 8.29 (d,  $J = 7.7$  Hz, 1H), 7.64 (d,  $J = 8.2$  Hz, 1H), 7.46 (t,  $J = 7.5$  Hz, 1H), 7.26 (d,  $J = 6.6$  Hz, 3H), 7.05 (d,  $J = 6.7$  Hz, 2H), 4.51 (s, 2H), 3.83 (s, 3H), 2.84 (s, 2H), 2.12 (s, 2H), 1.96 (d,  $J = 26.2$  Hz, 2H).  $^{13}\text{C NMR}$  (101 MHz,  $\text{DMSO-}d_6$ )  $\delta$  159.3, 155.3, 145.02, 141.3, 140.7, 131.4, 131.1, 125.9, 122.8, 121.5, 120.5, 118.5, 118.4, 112.1, 110.1, 92.8, 55.6, 43.5, 27.6, 26.8, 26.4. **HRMS (ESI)** calcd for  $\text{C}_{24}\text{H}_{21}\text{N}_2\text{O}_2^+$   $[\text{M}+\text{H}]^+$  369.1603, found 369.1599.

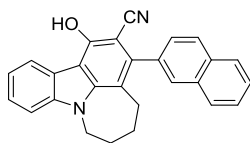

**1-Hydroxy-3-(naphthalen-2-yl)-4,5,6,7-tetrahydroazepino[3,2,1-jk]carbazole-2-carbonitrile (2s):** White solid (52.0 mg, 67%). M.p. 297 – 298 °C.  $^1\text{H NMR}$  (400 MHz,  $\text{DMSO-}d_6$ )  $\delta$  10.90 (s, 1H), 8.31 (d,  $J = 7.6$  Hz, 1H), 8.04 (d,  $J = 8.9$  Hz, 3H), 7.92 (s, 1H), 7.68 (d,  $J = 7.9$  Hz, 1H), 7.60 (s, 2H), 7.49 (s, 2H), 7.29 (d,  $J = 7.2$  Hz, 1H), 4.55 (s, 2H), 2.85 (s, 2H), 2.14 (s, 2H), 1.95 (s, 2H).  $^{13}\text{C NMR}$  (101 MHz,  $\text{DMSO-}d_6$ )  $\delta$  154.9, 144.5, 140.9, 140.3, 136.1, 132.6, 132.3, 128.5, 128.1, 127.8, 127.7, 127.6, 126.5, 125.6, 122.4, 121.0, 120.1, 118.0, 117.9, 111.7, 109.7, 91.9, 43.1, 27.1, 26.5, 25.8. **HRMS (ESI)** calcd for  $\text{C}_{27}\text{H}_{21}\text{N}_2\text{O}^+$   $[\text{M}+\text{H}]^+$  389.1654, found 389.1651.

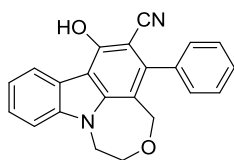

**7-Hydroxy-5-phenyl-1,2-dihydro-4H-[1,4]oxazepino[6,5,4-jk]carbazole-6-carbonitrile (2t):** White solid (36.1 mg, 53%). M.p. 272 – 274 °C.  $^1\text{H NMR}$  (400 MHz,  $\text{DMSO-}d_6$ )  $\delta$  11.10 (s, 1H), 8.35 (d,  $J = 7.7$  Hz, 1H), 7.69 (d,  $J = 8.3$  Hz, 1H), 7.55 – 7.47 (m, 4H), 7.35 – 7.32 (m, 3H), 4.69 (s, 2H), 4.53 – 4.51 (m, 2H), 4.24 – 4.21 (m, 2H).  $^{13}\text{C NMR}$  (101 MHz,  $\text{DMSO-}d_6$ )  $\delta$  155.2, 143.2, 140.8, 139.7, 137.6, 129.3, 128.4, 128.2, 125.9, 122.4, 121.3, 120.7, 117.2, 116.4, 112.5, 110.1, 92.3, 70.1, 69.9, 47.5. **HRMS (ESI)** calcd for  $\text{C}_{22}\text{H}_{17}\text{N}_2\text{O}_2^+$   $[\text{M}+\text{H}]^+$  341.1290, found 341.1284.

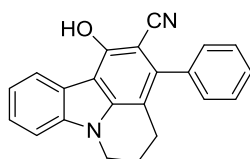

**2-Ethyl-1,1,3-triphenyl-1H-phosphindol-1-ium tetrafluoroborate (2u):** White solid (57.6 mg, 89%). M.p. 272 – 273 °C.  $^1\text{H NMR}$  (400 MHz,  $\text{DMSO-}d_6$ )  $\delta$  10.81 (s, 1H), 8.32 (d,  $J = 7.8$  Hz, 1H), 7.62 – 7.41 (m, 7H), 7.29 (t,  $J = 7.5$  Hz, 1H), 4.24 (t,  $J = 5.4$  Hz, 2H), 2.69 (t,  $J = 5.8$  Hz, 2H), 2.12 – 2.10 (m, 2H).  $^{13}\text{C NMR}$  (101 MHz,  $\text{DMSO-}d_6$ )  $\delta$  155.0, 140.6, 139.5, 138.8, 137.2, 129.6, 128.2, 127.9, 125.4, 122.5, 120.7, 119.9, 118.1, 112.5, 109.2, 108.9, 91.0, 40.6, 22.9, 21.7. **HRMS (ESI)** calcd for  $\text{C}_{22}\text{H}_{17}\text{N}_2\text{O}^+$   $[\text{M}+\text{H}]^+$  325.1341, found 325.1340.

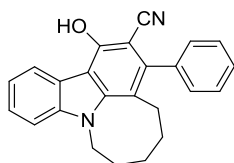

**1-Hydroxy-3-phenyl-5,6,7,8-tetrahydro-4H-azocino[3,2,1-jk]carbazole-2-carbonitrile**

**(2v):** White solid (31.1 mg, 44%). M.p. 292 – 293 °C. <sup>1</sup>H NMR (400 MHz, DMSO-*d*<sub>6</sub>) δ 10.88 (s, 1H), 8.34 (d, *J* = 7.7 Hz, 1H), 7.69 (d, *J* = 8.3 Hz, 1H), 7.51 – 7.46 (m, 4H), 7.30 – 7.26 (m, 3H), 4.80 (s, 2H), 2.99-2.73 (m, 2H), 1.94 (s, 2H), 1.66 (s, 2H), 1.29 (s, 2H). <sup>13</sup>C NMR (101 MHz, DMSO-*d*<sub>6</sub>) δ 154.6, 144.3, 142.0, 140.0, 139.1, 129.2, 128.1, 127.8, 125.5, 122.4, 120.7, 120.0, 117.6, 115.6, 111.1, 109.0, 92.1, 42.5, 29.1, 28.8, 26.6, 21.0. HRMS (ESI) calcd for C<sub>24</sub>H<sub>21</sub>N<sub>2</sub>O<sup>+</sup> [M+H]<sup>+</sup> 353.1654, found 353.1648.

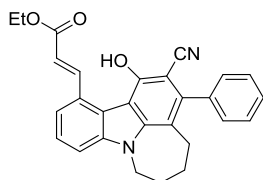

**Ethyl (E)-3-(2-cyano-1-hydroxy-3-phenyl-4,5,6,7-tetrahydroazepino[3,2,1-jk]carbazol-12-yl)acrylate (8):** Yellow solid (33.2 mg, 38%). M.p. 199 – 200 °C. <sup>1</sup>H NMR (400 MHz, DMSO-*d*<sub>6</sub>) δ 11.25 (s, 1H), 9.50 (d, *J* = 15.8 Hz, 1H), 7.77 (d, *J* = 8.2 Hz, 1H), 7.66 (d, *J* = 7.6 Hz, 1H), 7.54 – 7.45 (m, 4H), 7.37 (d, *J* = 6.6 Hz, 2H), 6.52 (d, *J* = 15.7 Hz, 1H), 4.61 – 4.58 (m, 2H), 4.24 (q, *J* = 7.1 Hz, 2H), 2.86 – 2.83 (m, 2H), 2.13 (s, 2H), 1.94 (d, *J* = 5.4 Hz, 2H), 1.31 (t, *J* = 7.1 Hz, 3H). <sup>13</sup>C NMR (101 MHz, DMSO-*d*<sub>6</sub>) δ 166.4, 154.0, 147.1, 145.3, 141.8, 141.3, 138.3, 129.6, 129.4, 128.3, 127.9, 125.9, 120.1, 119.5, 118.0, 117.9, 117.8, 112.3, 111.3, 93.3, 59.8, 42.9, 26.8, 25.9, 25.6, 14.3. HRMS (ESI) calcd for C<sub>28</sub>H<sub>25</sub>N<sub>2</sub>O<sub>3</sub><sup>+</sup> [M+H]<sup>+</sup> 437.1865, found 437.1862.

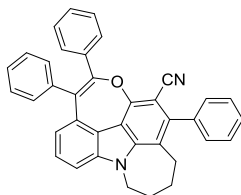

**2,3,12-Triphenyl-8,9,10,11-tetrahydroazepino[3,2,1-jk]oxepino[5,4,3,2-def]carbazole-13-carbonitrile (10):** Yellow solid (89.5 mg, 87%). M.p. 290 – 291 °C. <sup>1</sup>H NMR (400 MHz, DMSO-*d*<sub>6</sub>) δ 7.52 – 7.41 (m, 4H), 7.34 – 7.10 (m, 13H), 6.13 (d, *J* = 7.6 Hz, 1H), 4.44 – 4.42 (m, 2H), 2.78 – 2.75 (m, 2H), 2.14 (d, *J* = 5.5 Hz, 2H), 1.94 – 1.92 (m, 2H). <sup>13</sup>C NMR (101 MHz, CDCl<sub>3</sub>) δ 155.0, 151.6, 143.1, 142.4, 140.4, 139.5, 138.4, 138.1, 133.5, 132.1,

129.8, 129.8, 129.7, 129.7, 129.6, 128.4, 128.1, 128.1, 127.7, 127.3, 126.9, 126.7, 123.1, 121.7, 120.8, 120.6, 116.1, 113.9, 109.5, 93.1, 45.2, 28.6, 28.1, 26.6. **HRMS (ESI)** calcd for  $C_{37}H_{27}N_2O^+$   $[M+H]^+$  515.2123, found 515.2118.

## 7. Copies of $^1\text{H}$ , $^{13}\text{C}$ and $^{19}\text{F}$ NMR Spectra for Compounds

$^1\text{H}$  NMR spectrum of **1a** ( $\text{CDCl}_3$ , 400 MHz)

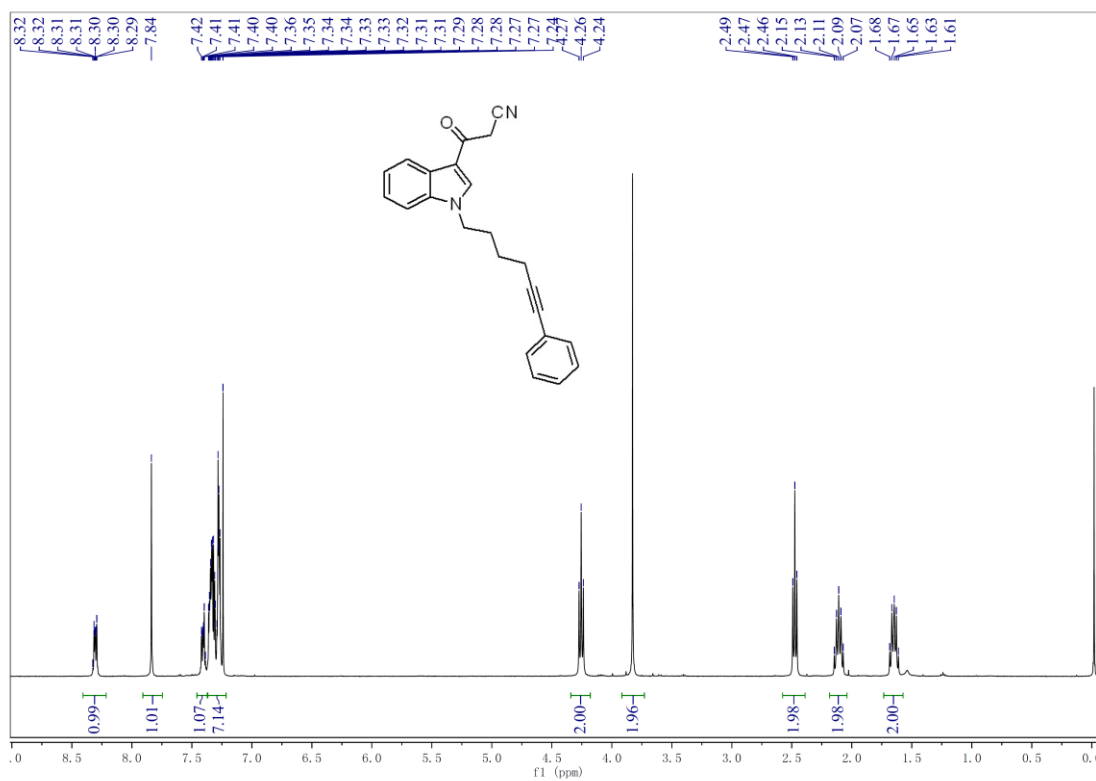

$^{13}\text{C}$  NMR spectrum of **1a** ( $\text{CDCl}_3$ , 101 MHz)

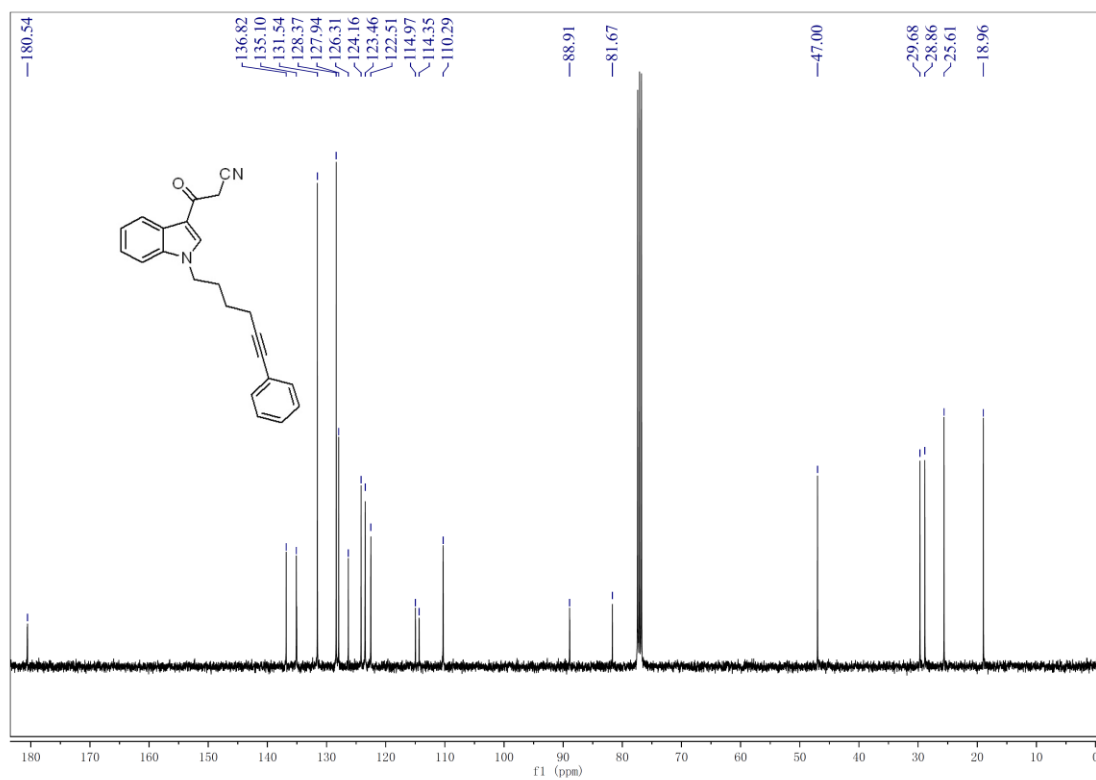

$^1\text{H}$  NMR spectrum of **1b** ( $\text{CDCl}_3$ , 400 MHz)

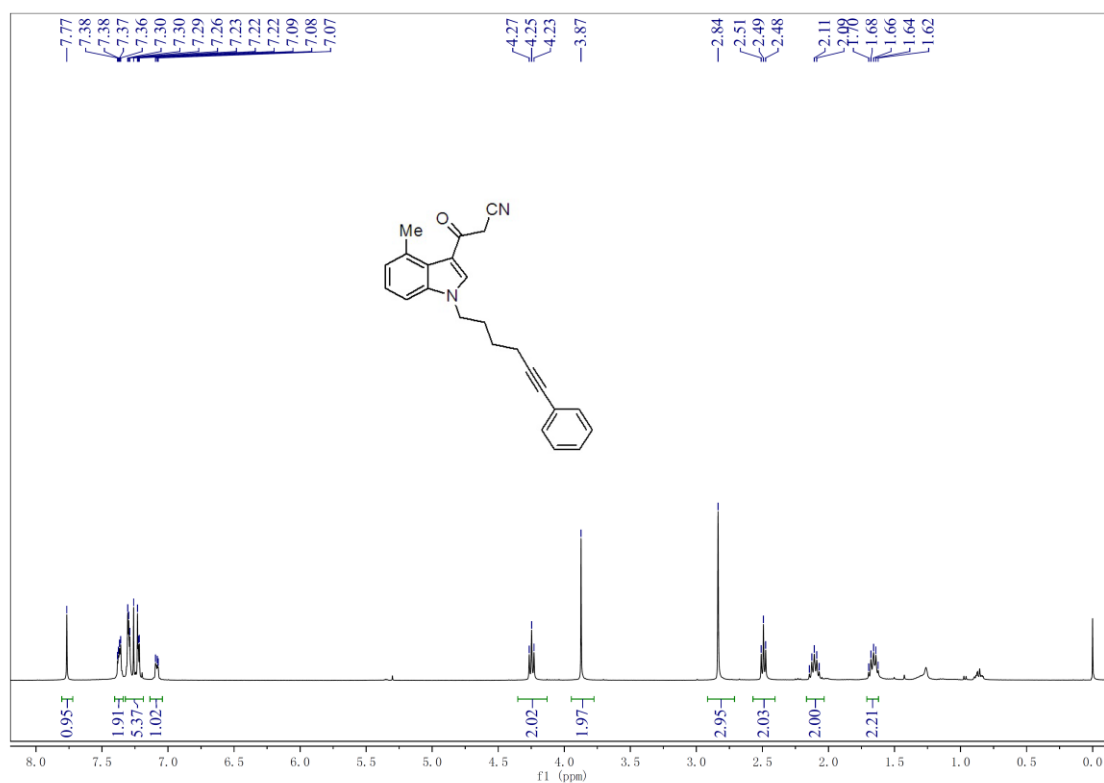

$^{13}\text{C}$  NMR spectrum of **1b** ( $\text{CDCl}_3$ , 101 MHz)

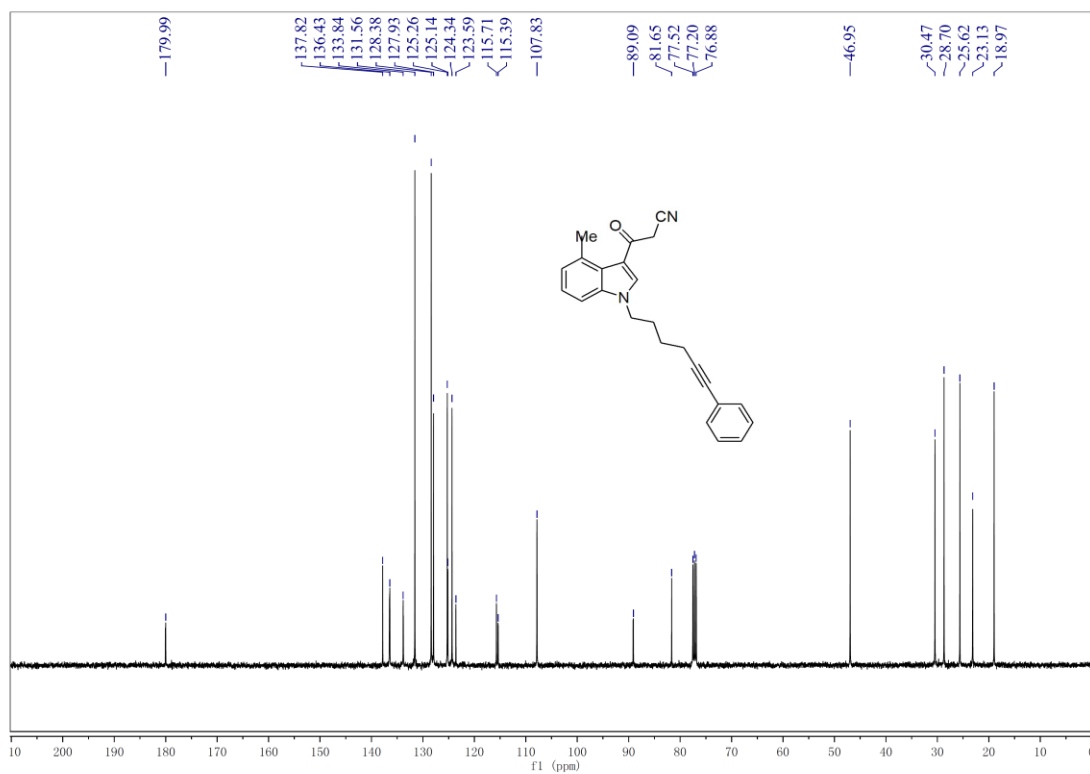



$^1\text{H}$  NMR spectrum of **1c** ( $\text{CDCl}_3$ , 400 MHz)

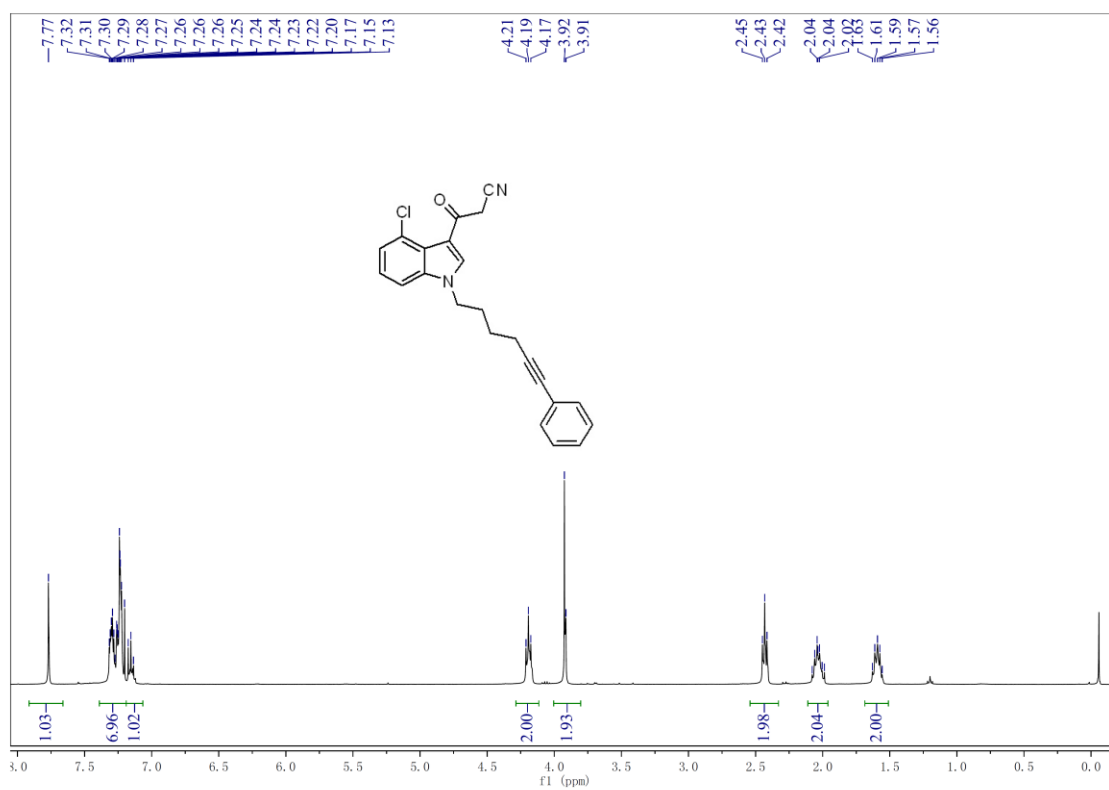

$^{13}\text{C}$  NMR spectrum of **1c** ( $\text{CDCl}_3$ , 101 MHz)

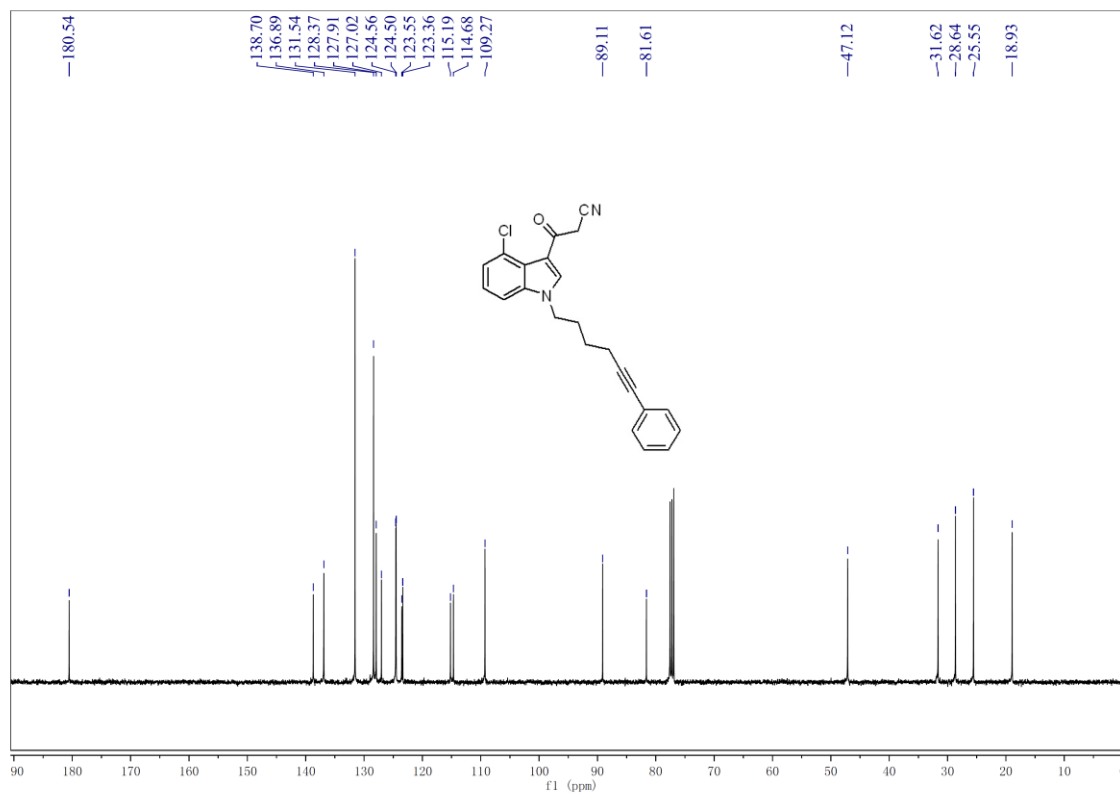

<sup>1</sup>H NMR spectrum of **1d** (CDCl<sub>3</sub>, 400 MHz)

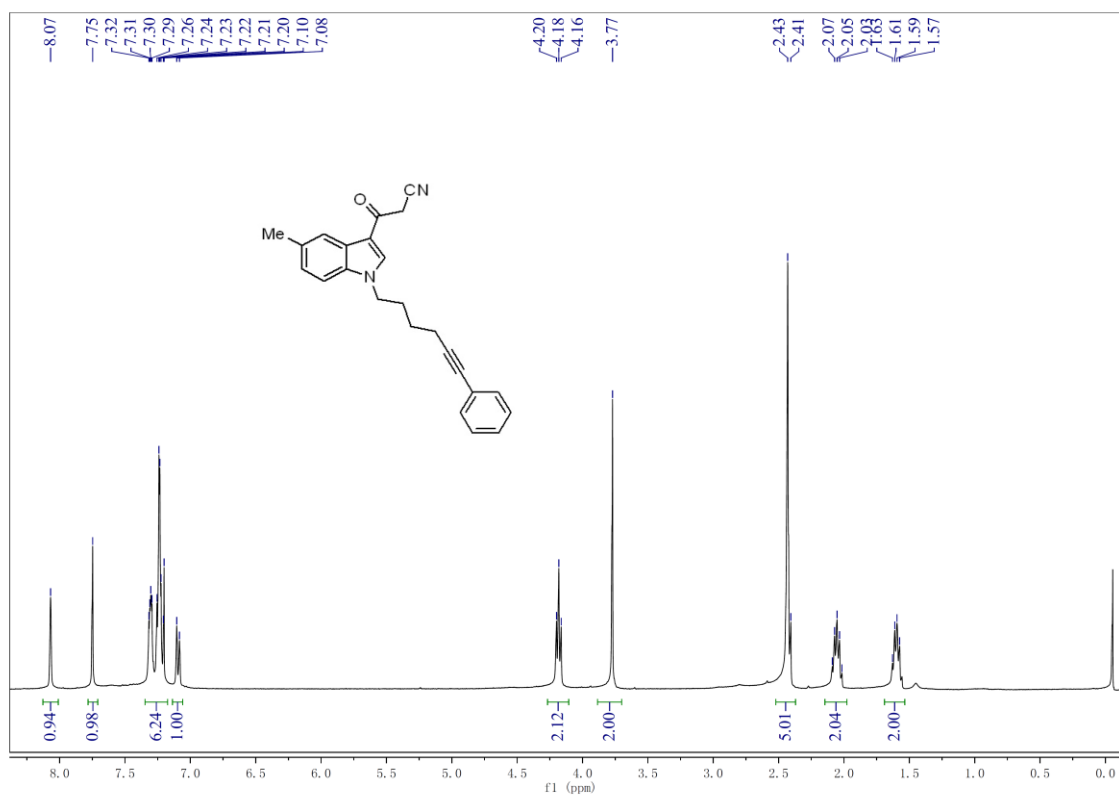

<sup>13</sup>C NMR spectrum of **1d** (CDCl<sub>3</sub>, 101 MHz)

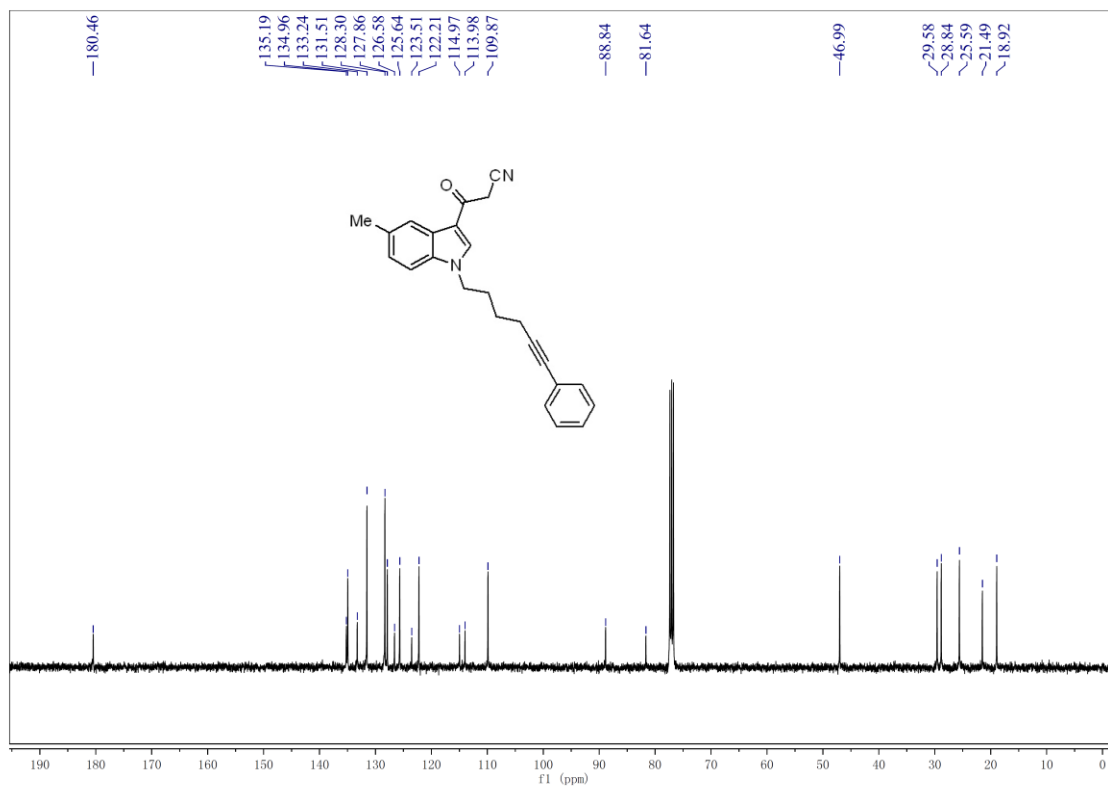

$^1\text{H}$  NMR spectrum of **1e** ( $\text{CDCl}_3$ , 400 MHz)

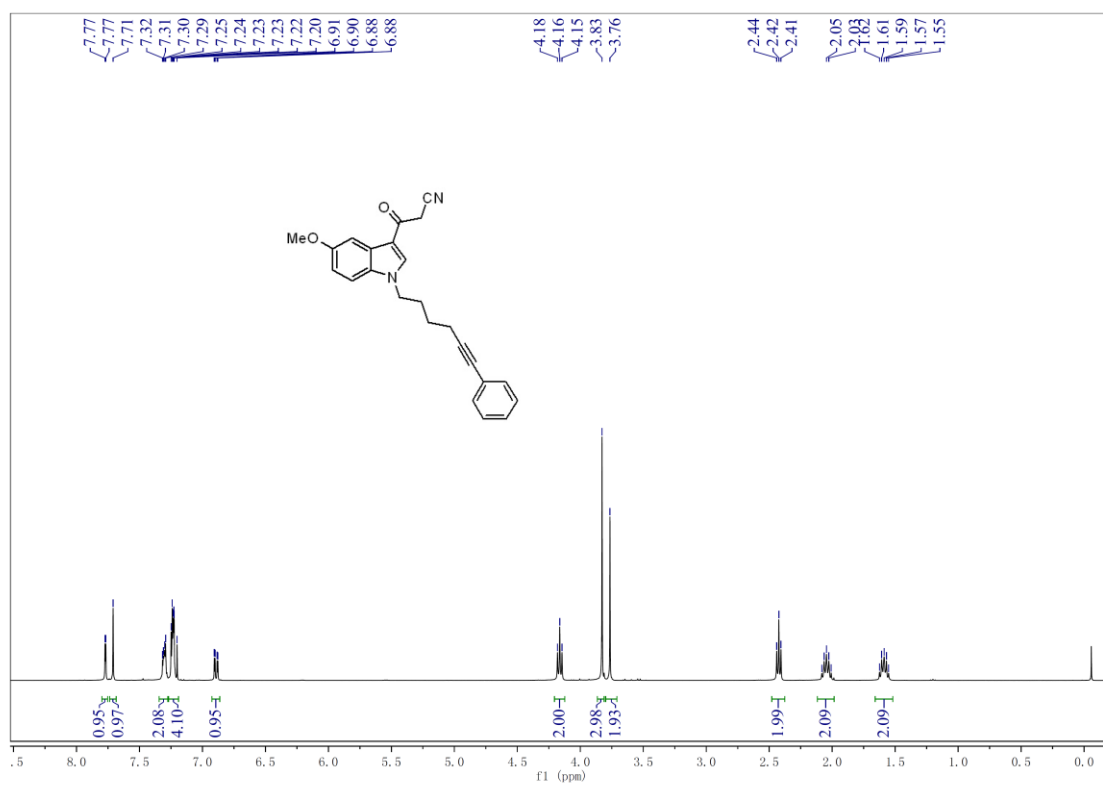

$^{13}\text{C}$  NMR spectrum of **1e** ( $\text{CDCl}_3$ , 101 MHz)

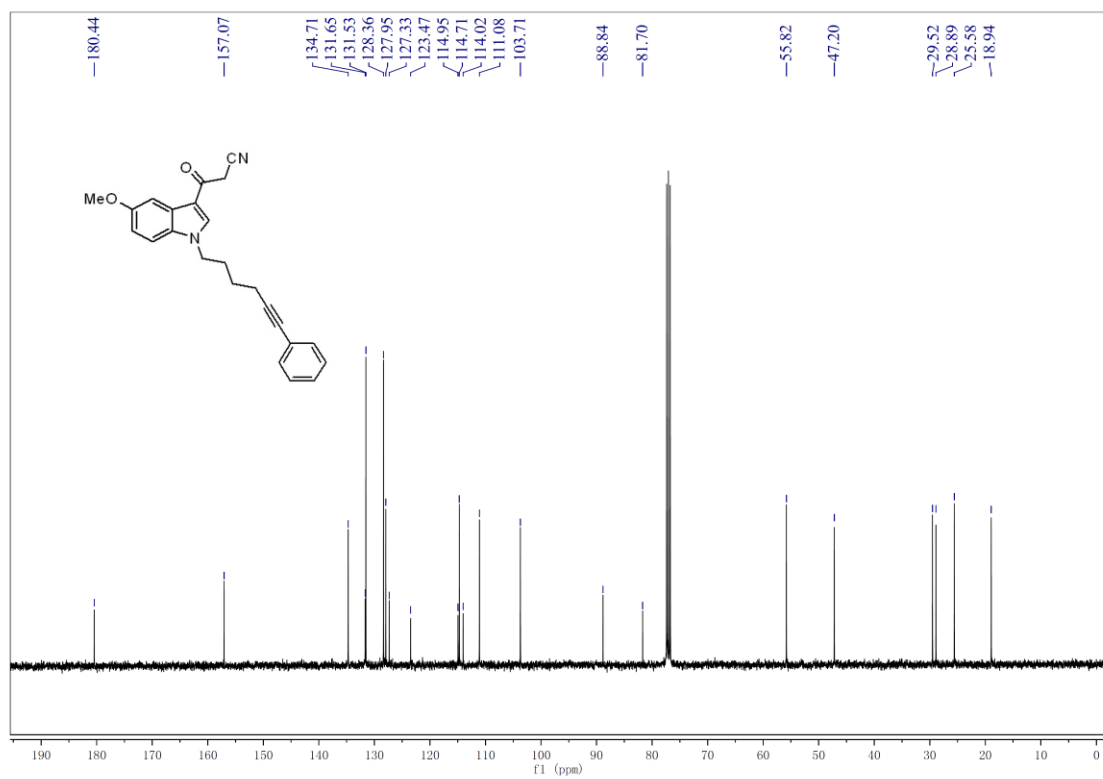

<sup>1</sup>H NMR spectrum of **1f** (CDCl<sub>3</sub>, 400 MHz)

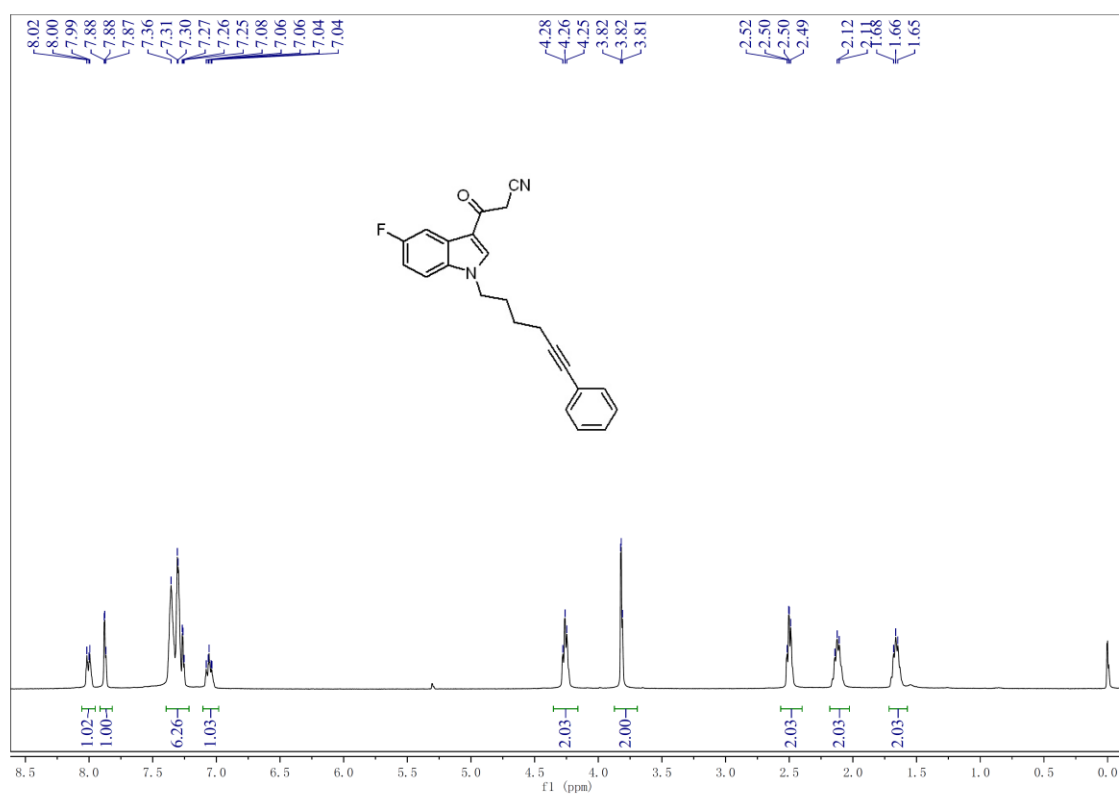

<sup>13</sup>C NMR spectrum of **1f** (CDCl<sub>3</sub>, 101 MHz)

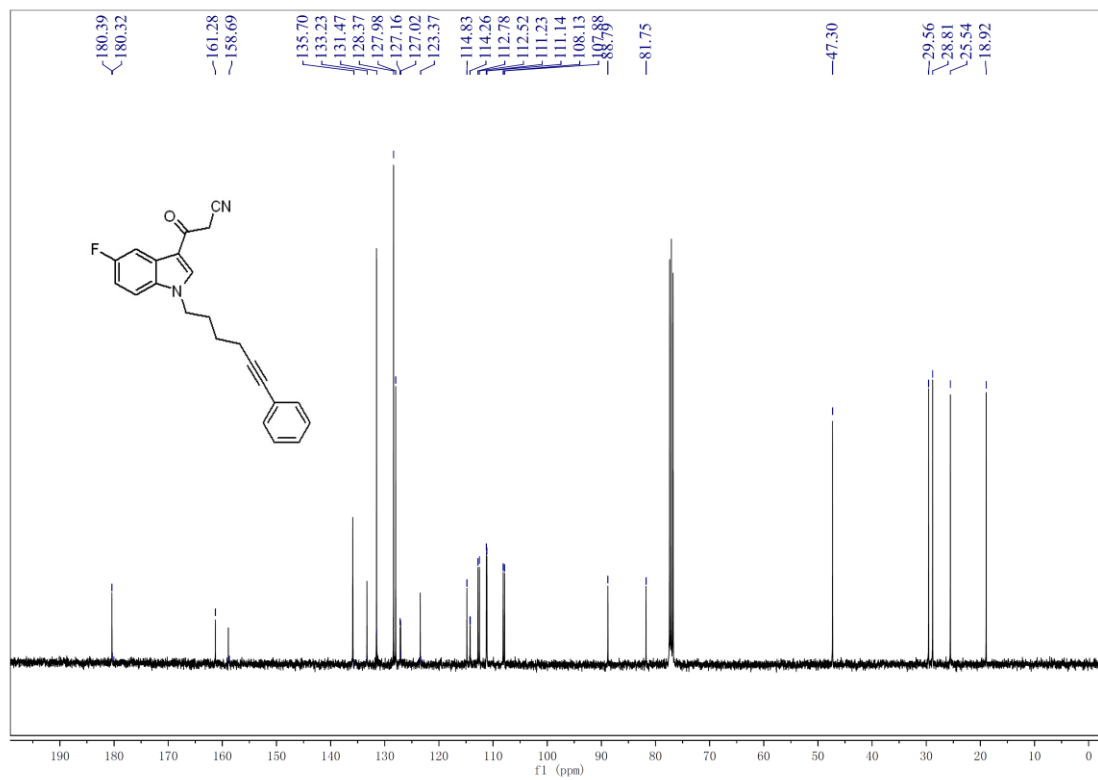

$^{19}\text{F}$  NMR spectrum of **1f** ( $\text{CDCl}_3$ , 376 MHz)

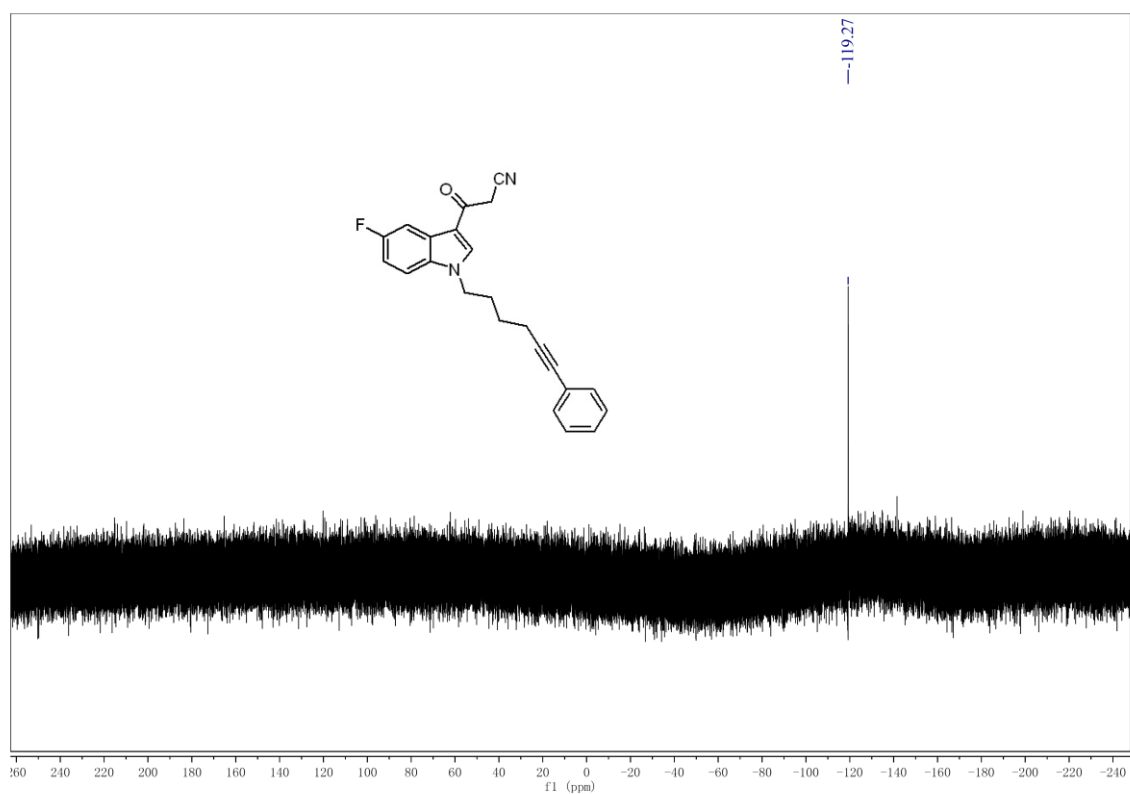

$^1\text{H}$  NMR spectrum of **1g** ( $\text{CDCl}_3$ , 400 MHz)

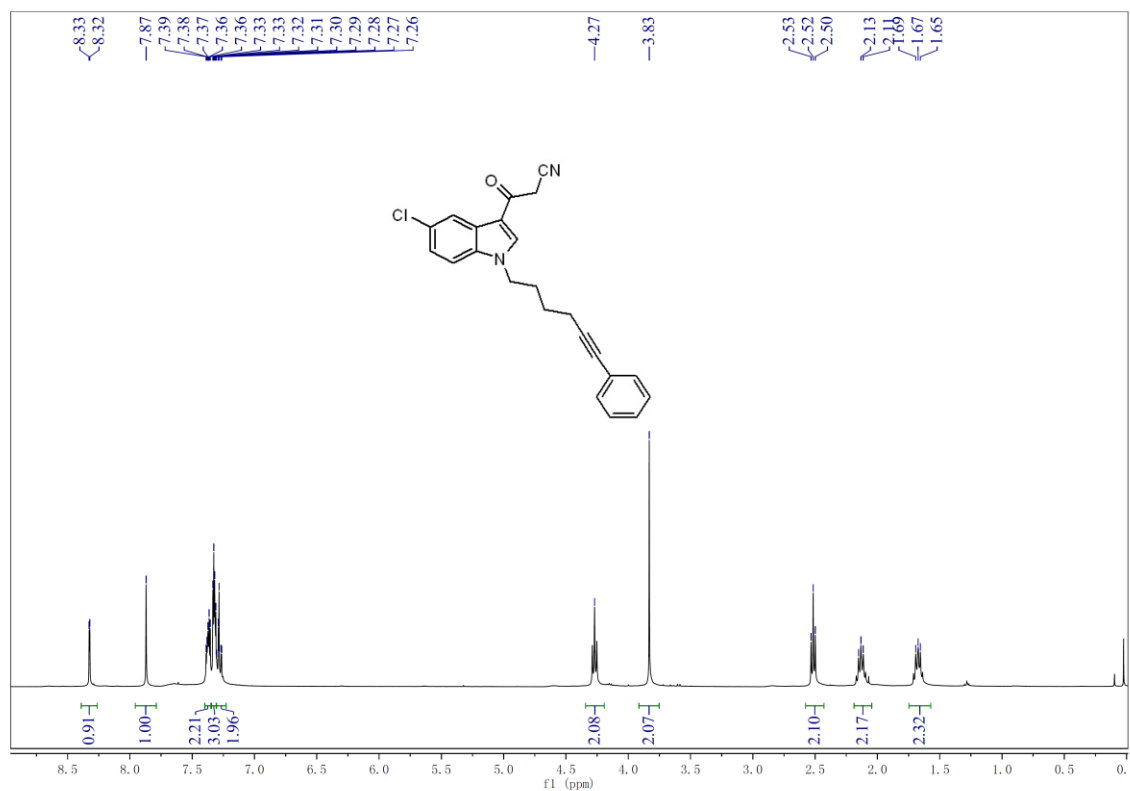

$^{13}\text{C}$  NMR spectrum of **1g** ( $\text{CDCl}_3$ , 101 MHz)

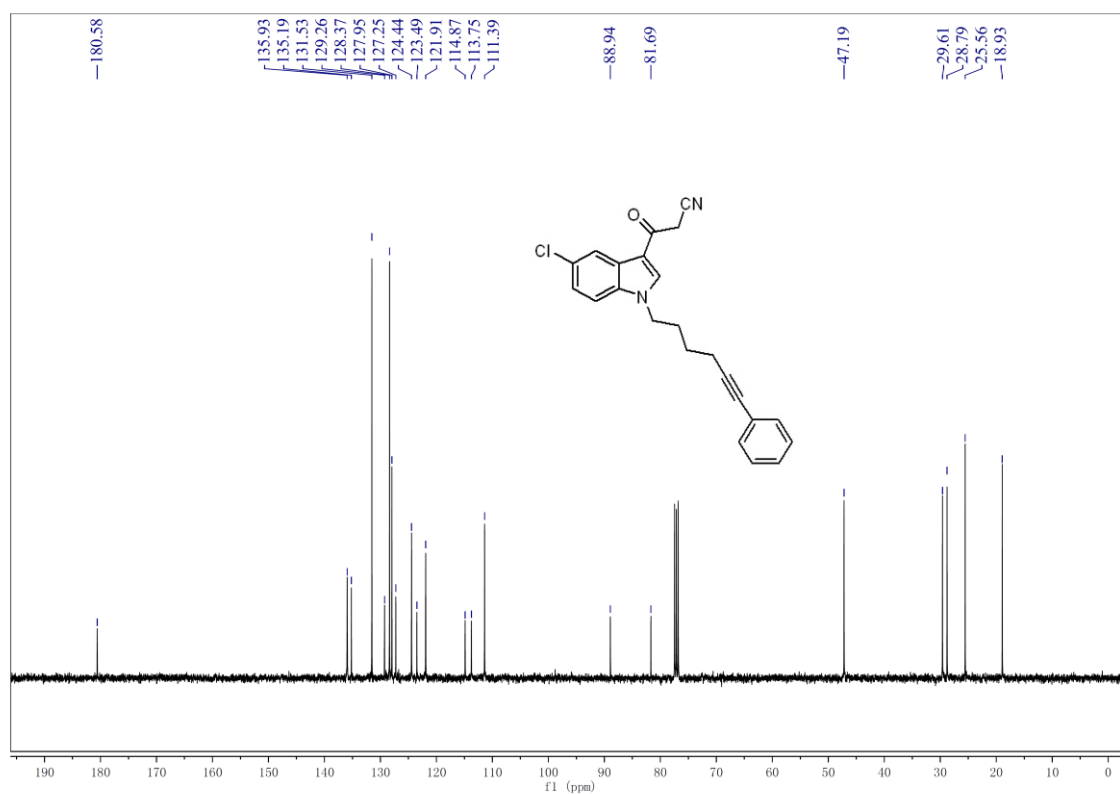

$^1\text{H}$  NMR spectrum of **1h** ( $\text{CDCl}_3$ , 400 MHz)

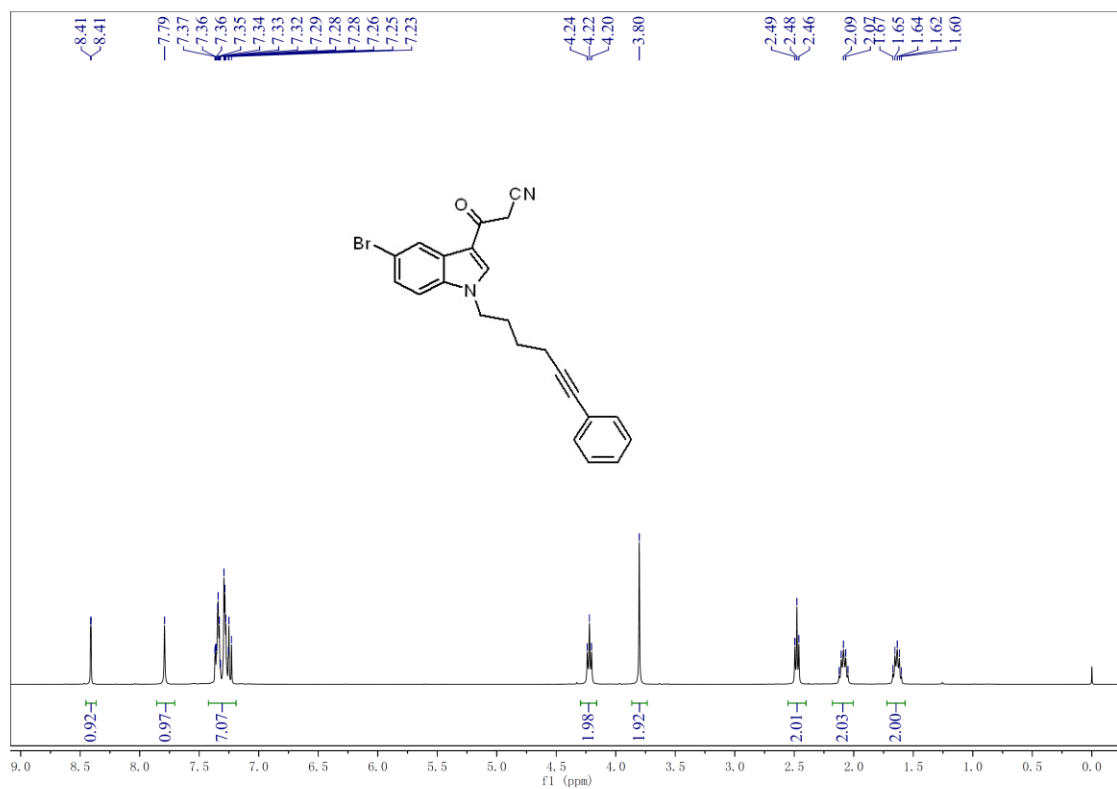

$^{13}\text{C}$  NMR spectrum of **1h** ( $\text{CDCl}_3$ , 101 MHz)

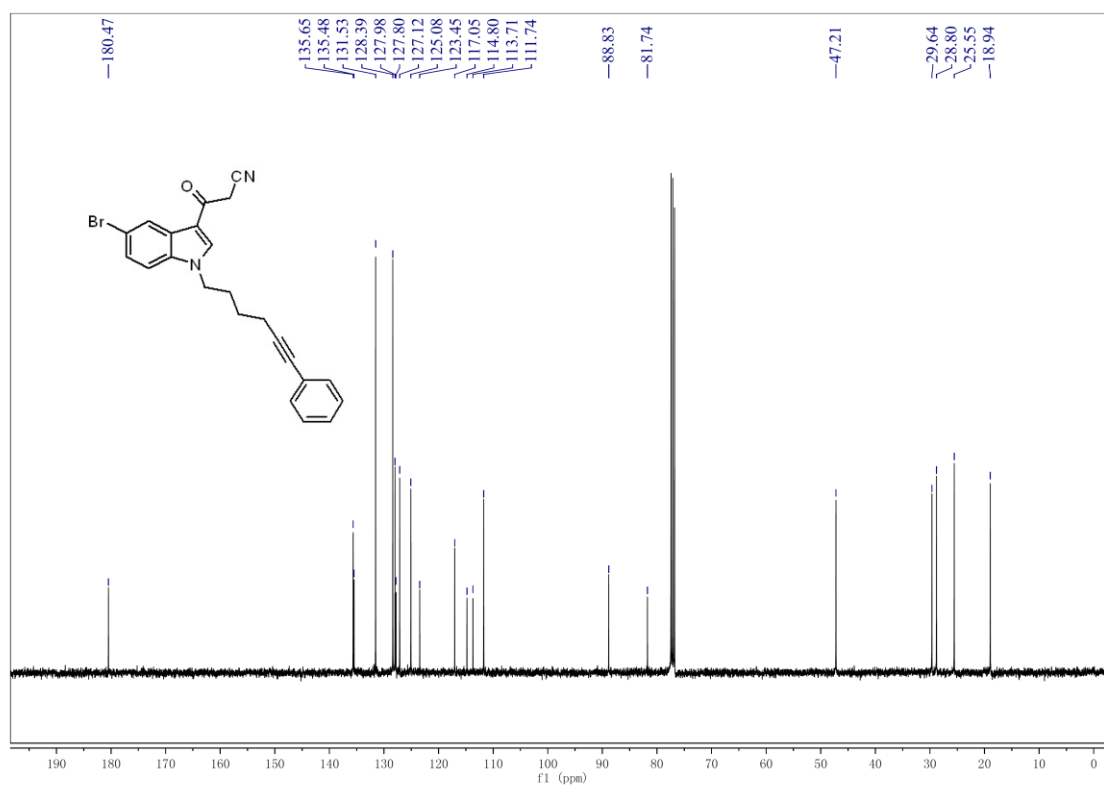

$^1\text{H}$  NMR spectrum of **1i** ( $\text{CDCl}_3$ , 400 MHz)

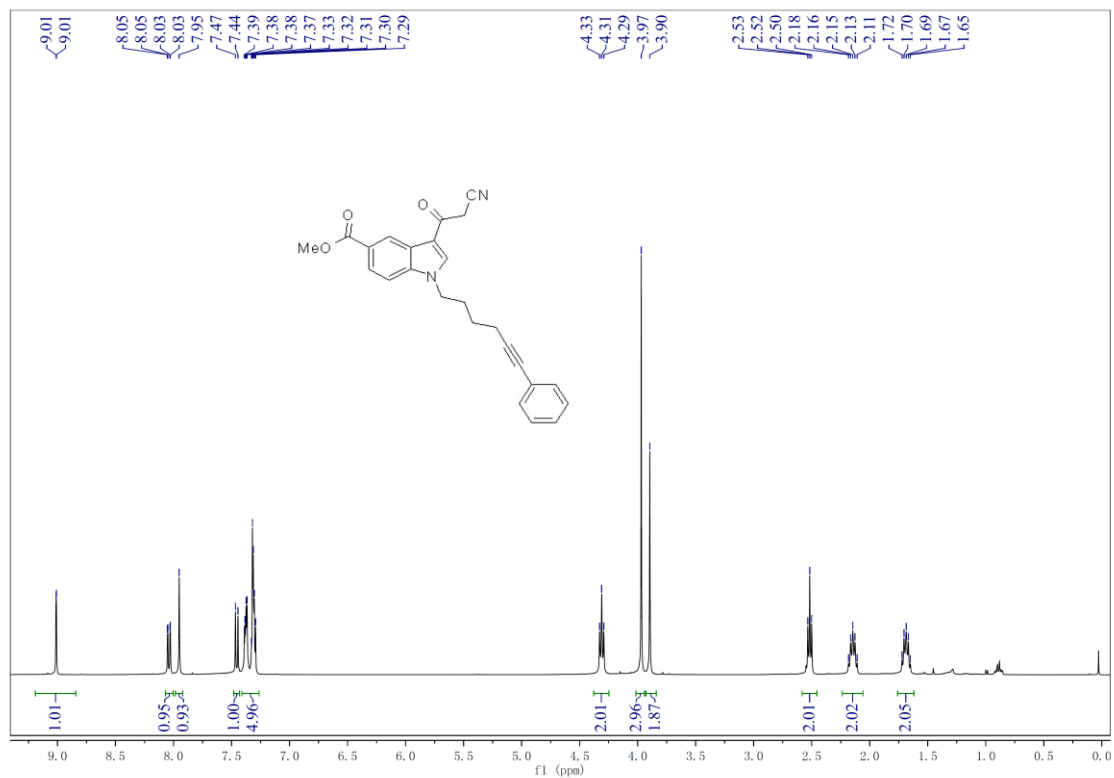

$^{13}\text{C}$  NMR spectrum of **1i** ( $\text{CDCl}_3$ , 101 MHz)

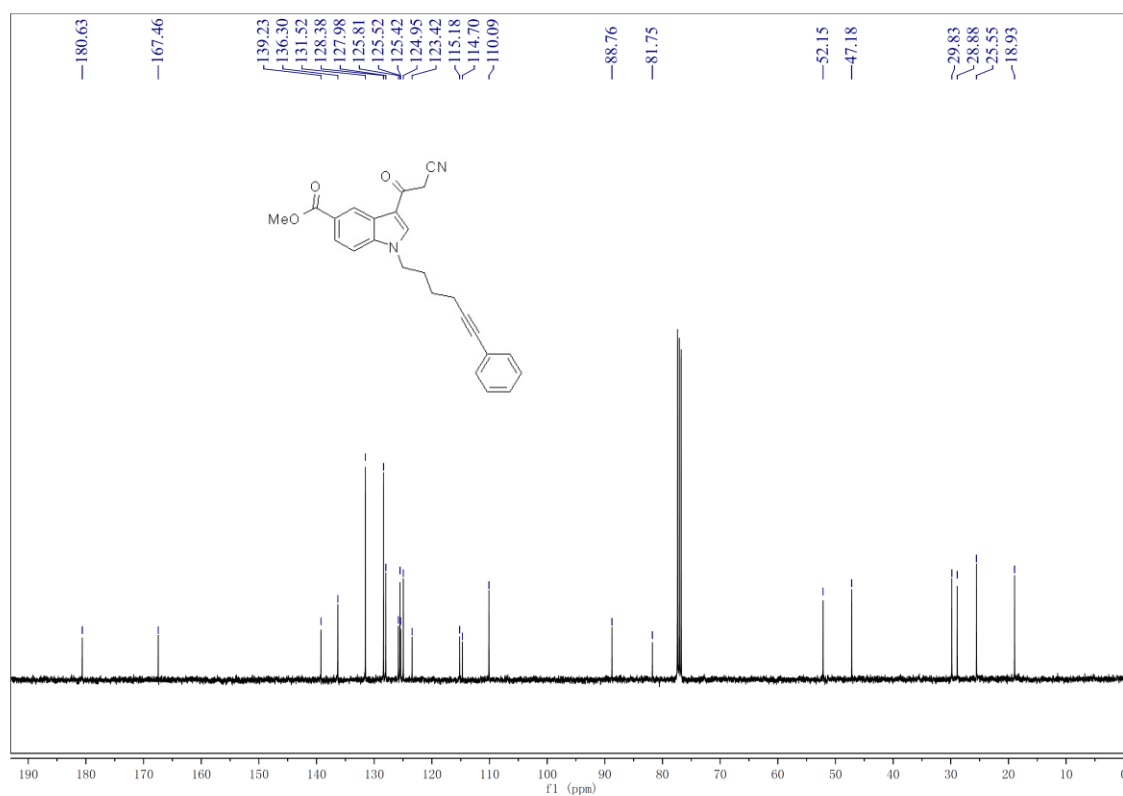

$^1\text{H}$  NMR spectrum of **1j** ( $\text{CDCl}_3$ , 400 MHz)

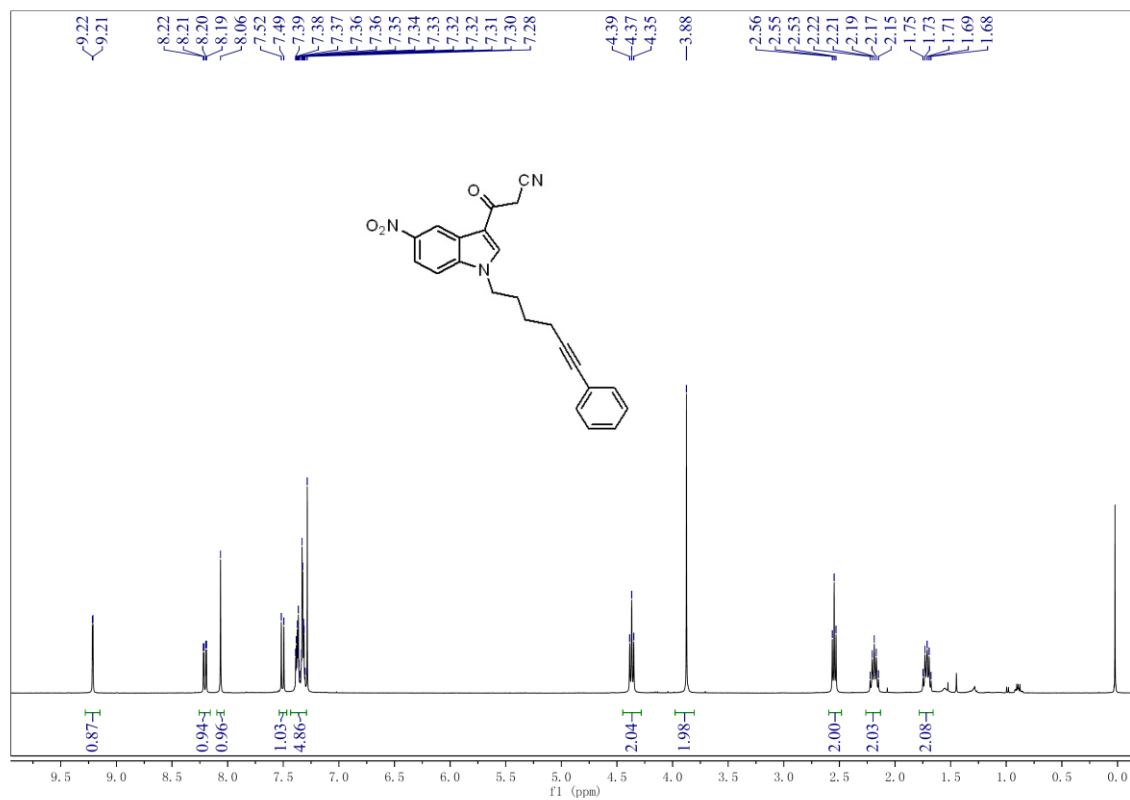



$^{13}\text{C}$  NMR spectrum of **1j** ( $\text{CDCl}_3$ , 101 MHz)

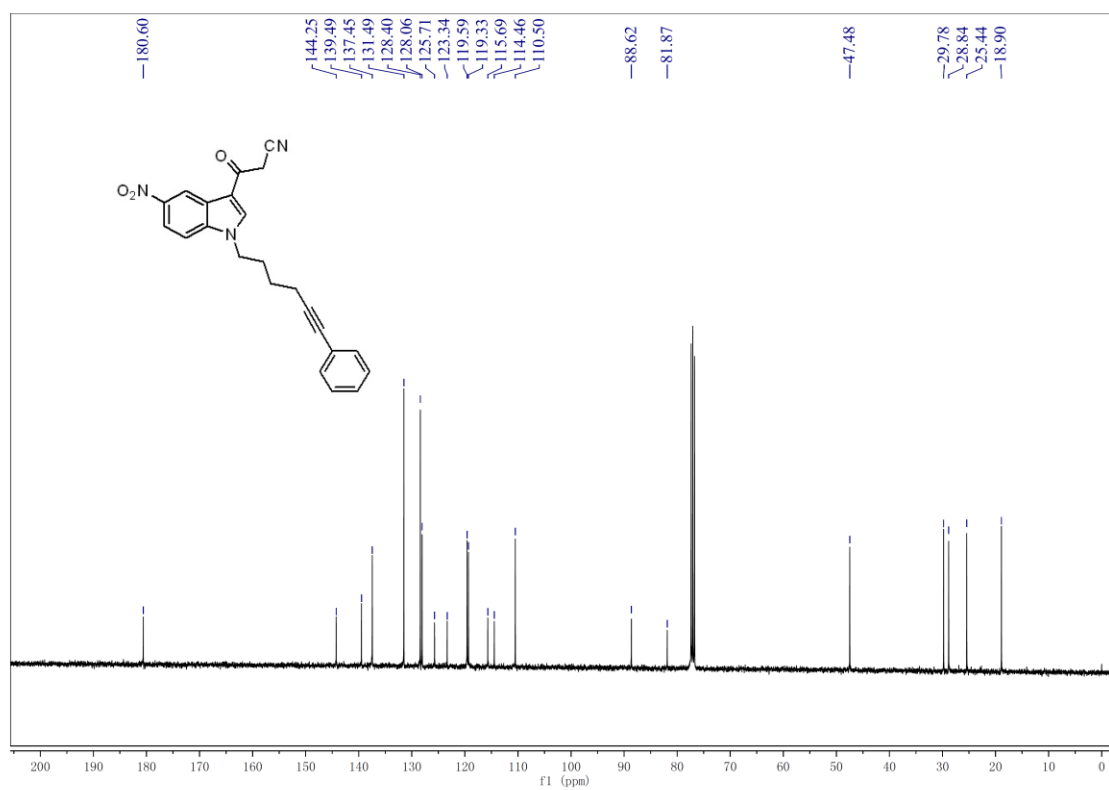

$^1\text{H}$  NMR spectrum of **1k** ( $\text{CDCl}_3$ , 400 MHz)

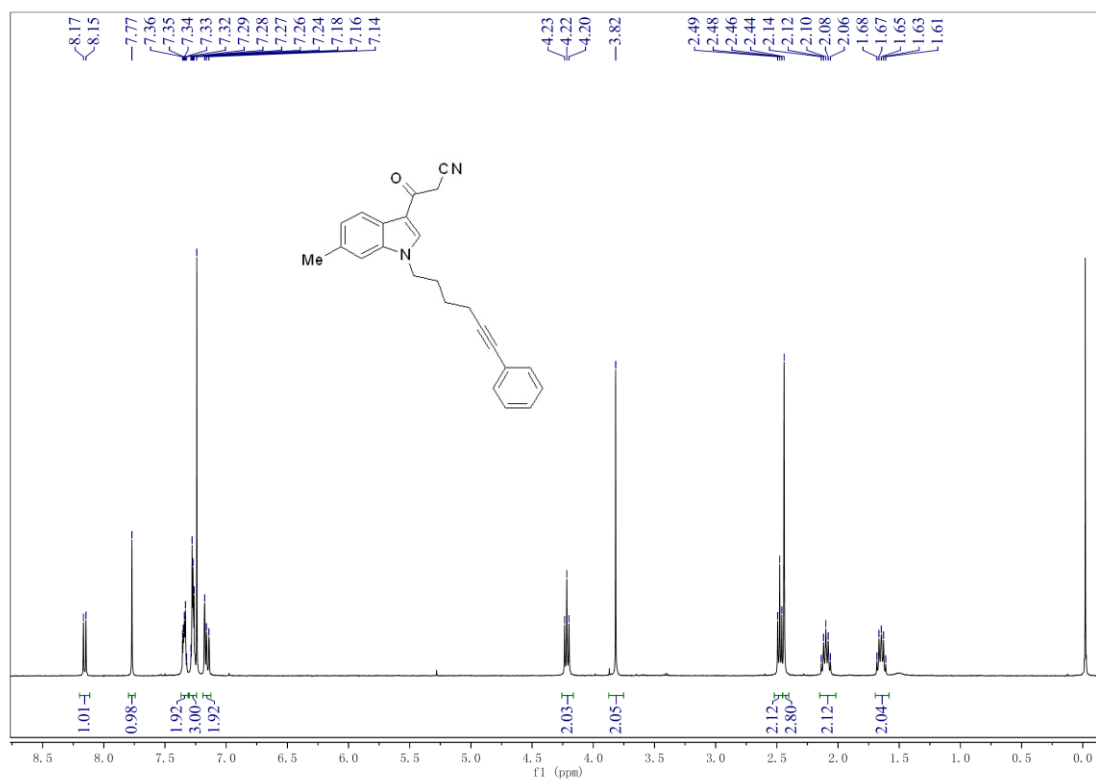

$^{13}\text{C}$  NMR spectrum of **1k** ( $\text{CDCl}_3$ , 101 MHz)

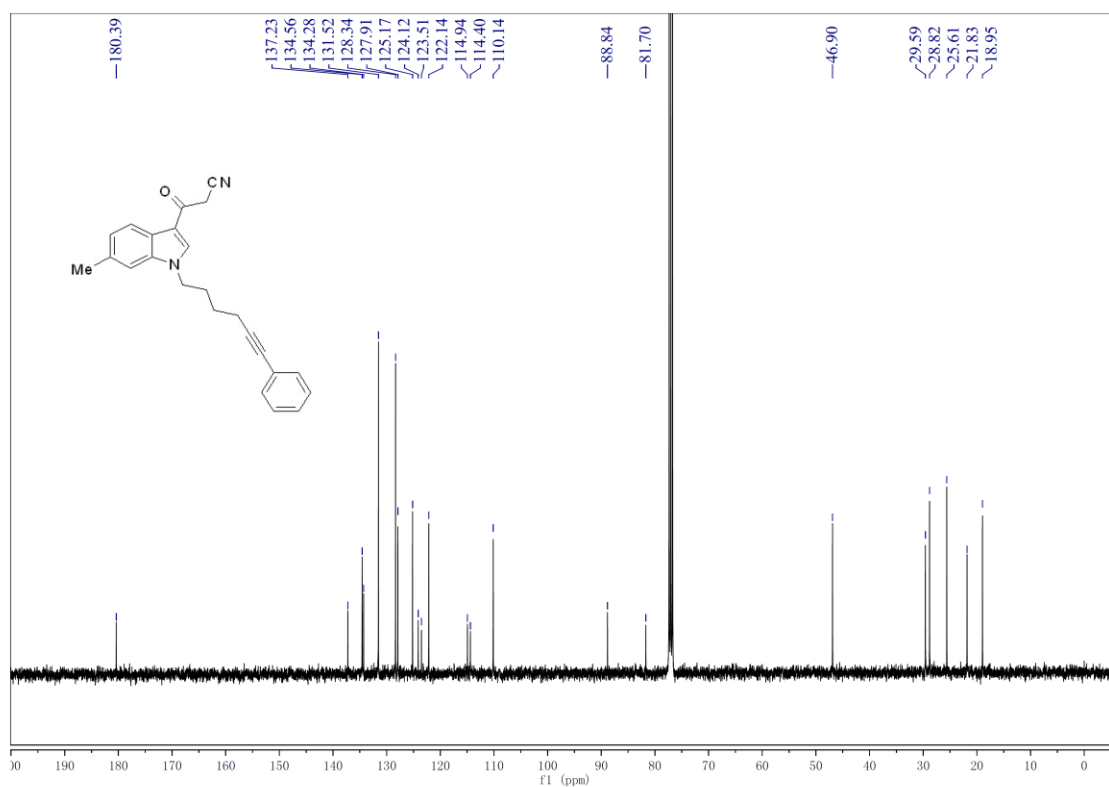

$^1\text{H}$  NMR spectrum of **1l** ( $\text{CDCl}_3$ , 400 MHz)

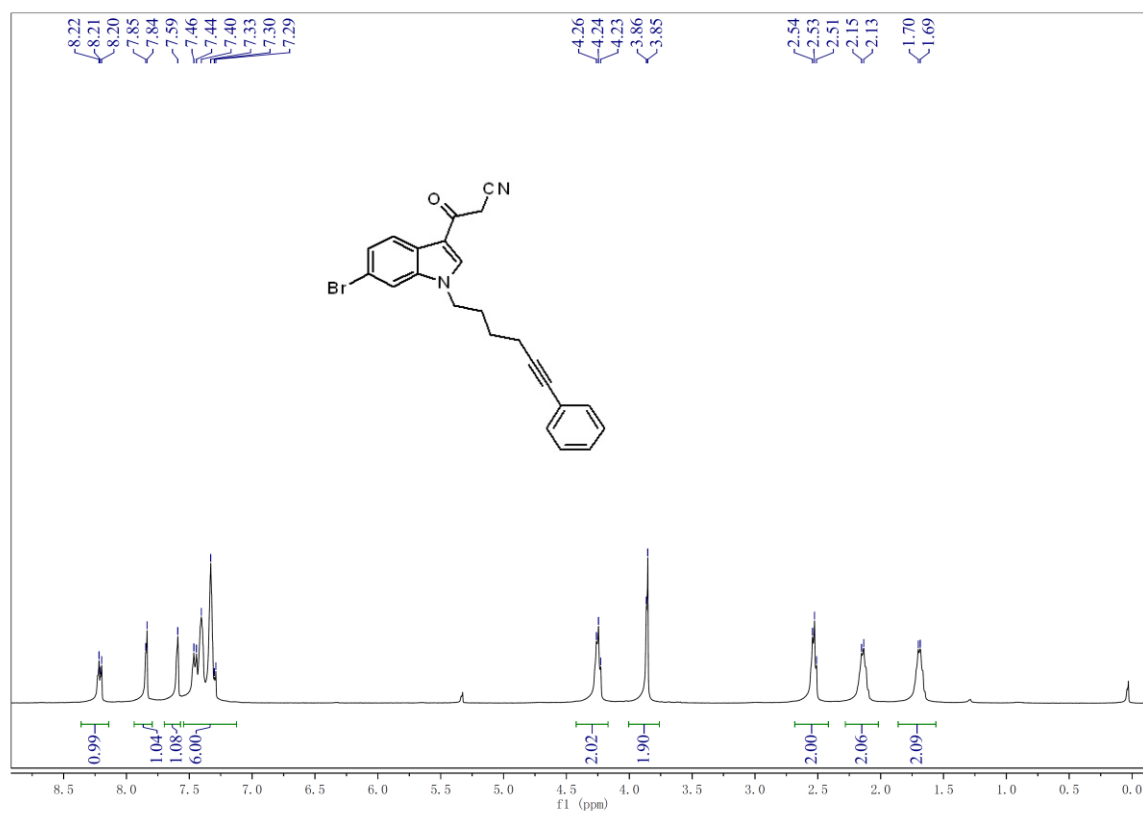

$^{13}\text{C}$  NMR spectrum of **1l** ( $\text{CDCl}_3$ , 101 MHz)

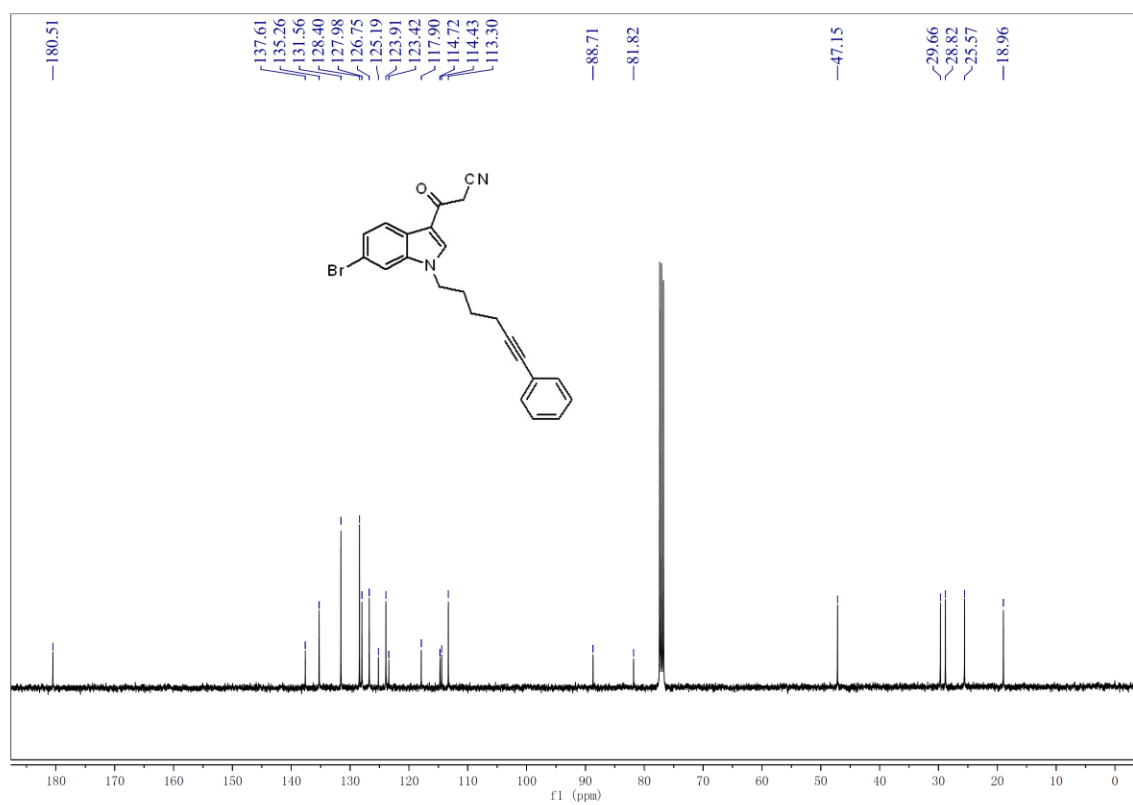

$^1\text{H}$  NMR spectrum of **1m** ( $\text{CDCl}_3$ , 400 MHz)

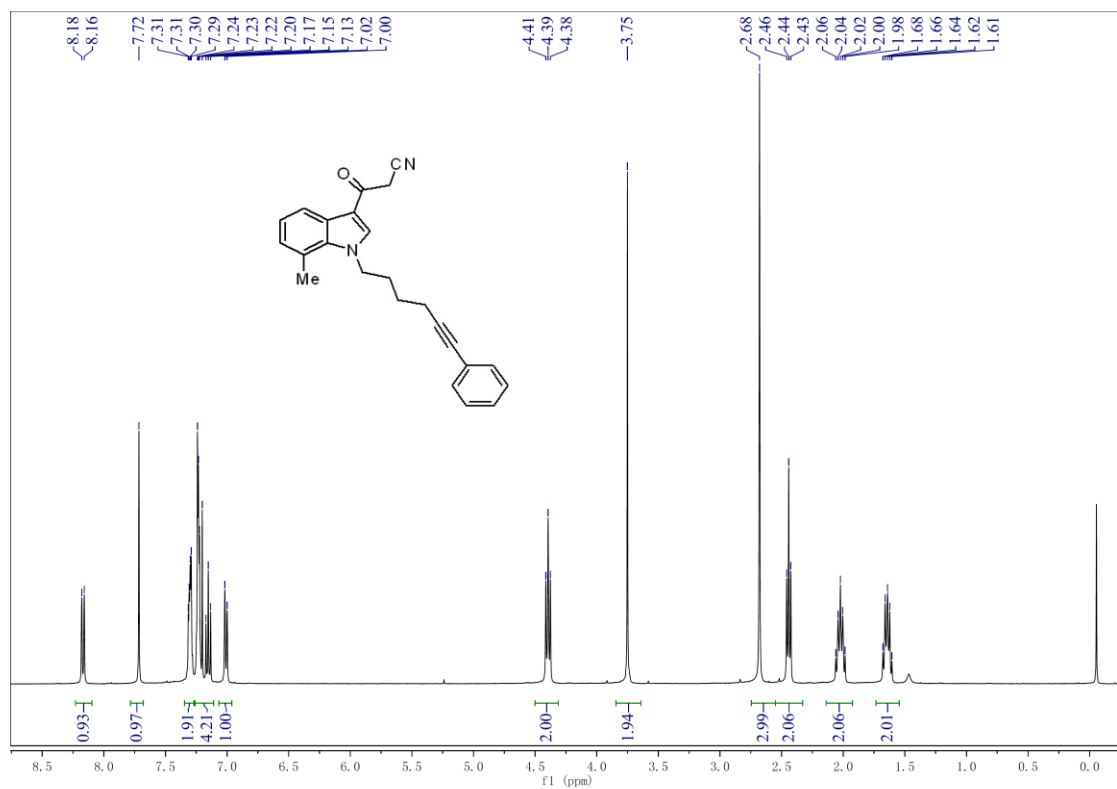

$^{13}\text{C}$  NMR spectrum of **1m** ( $\text{CDCl}_3$ , 101 MHz)

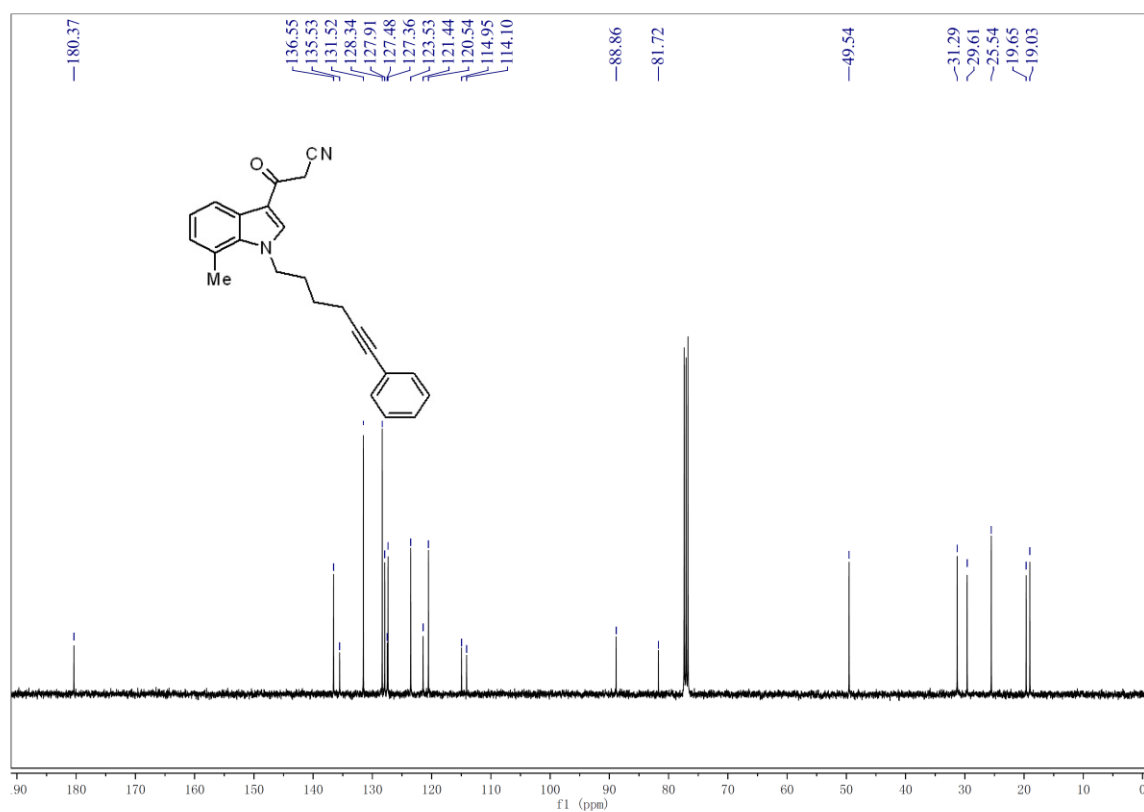

$^1\text{H}$  NMR spectrum of **1n** ( $\text{CDCl}_3$ , 400 MHz)

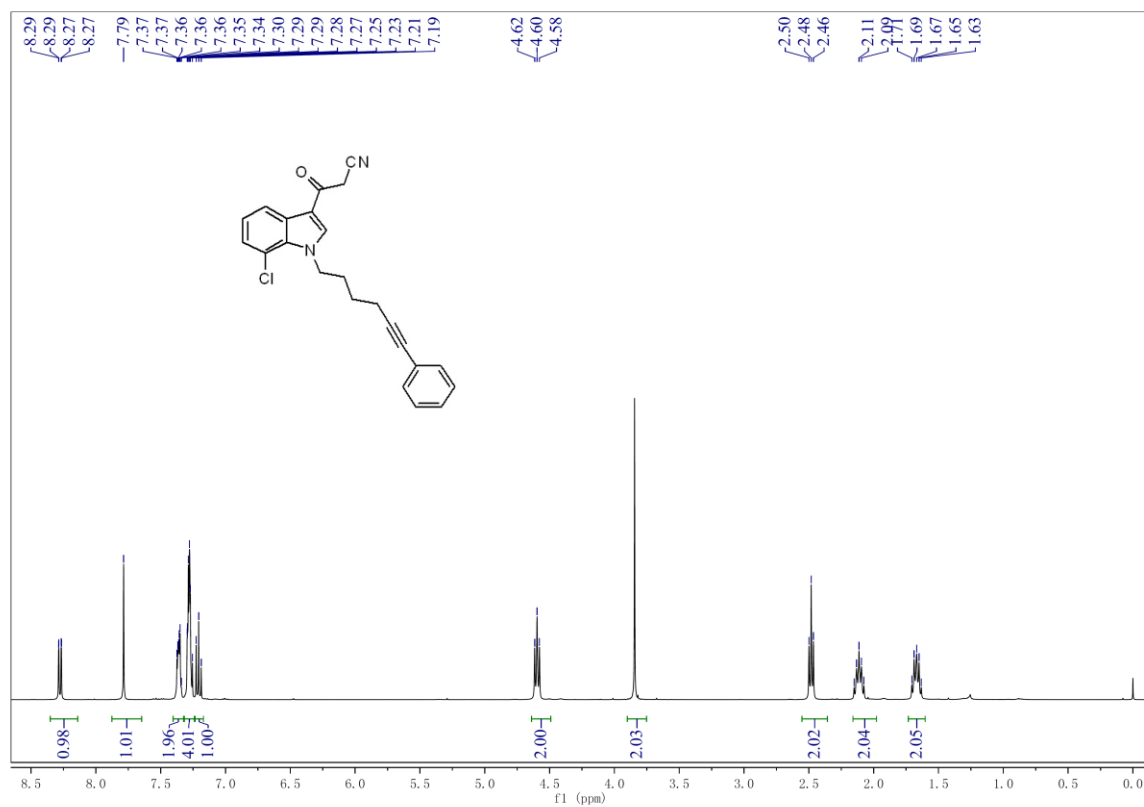

$^{13}\text{C}$  NMR spectrum of **1n** ( $\text{CDCl}_3$ , 101 MHz)

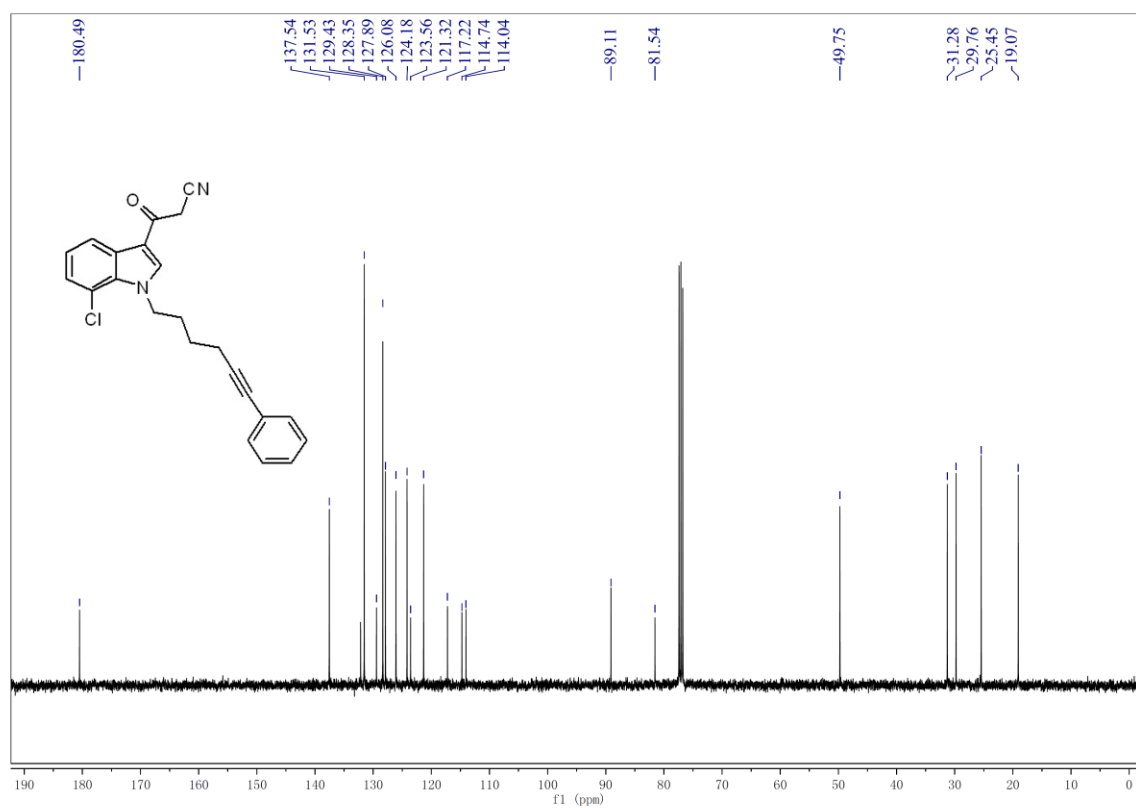

$^1\text{H}$  NMR spectrum of **1o** ( $\text{CDCl}_3$ , 400 MHz)

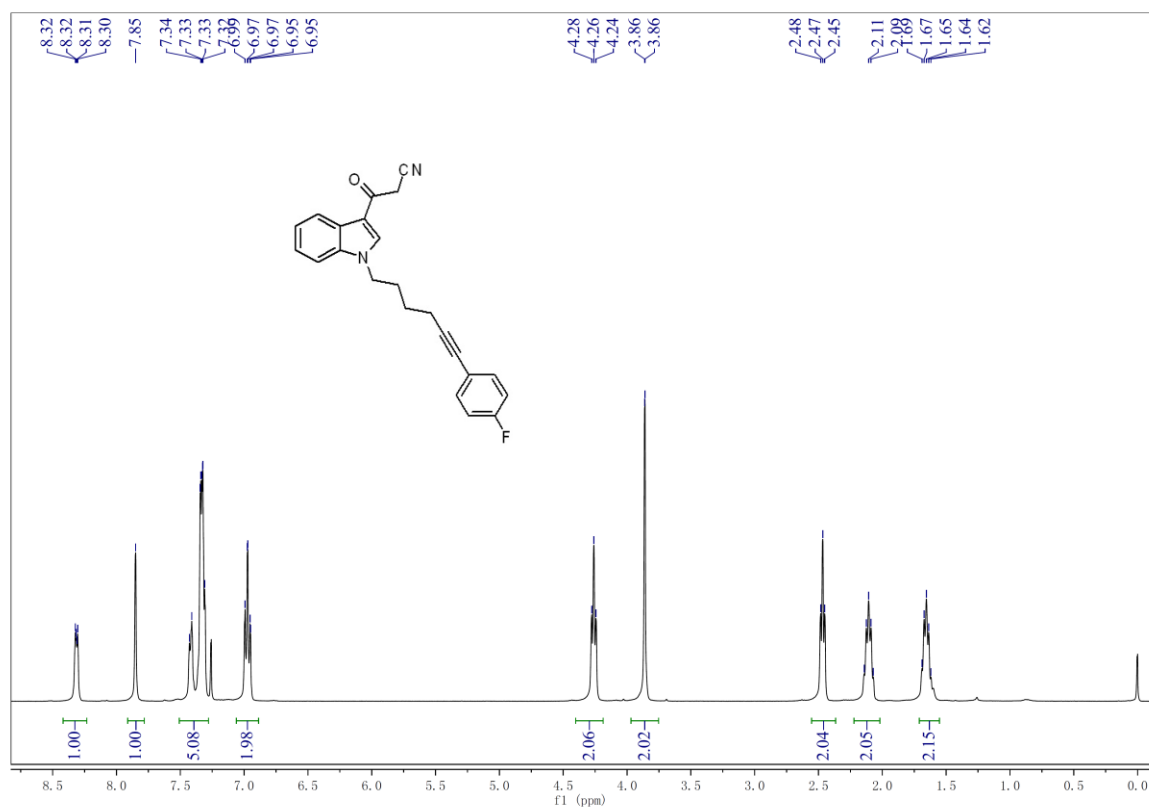

$^{13}\text{C}$  NMR spectrum of **1o** ( $\text{CDCl}_3$ , 101 MHz)

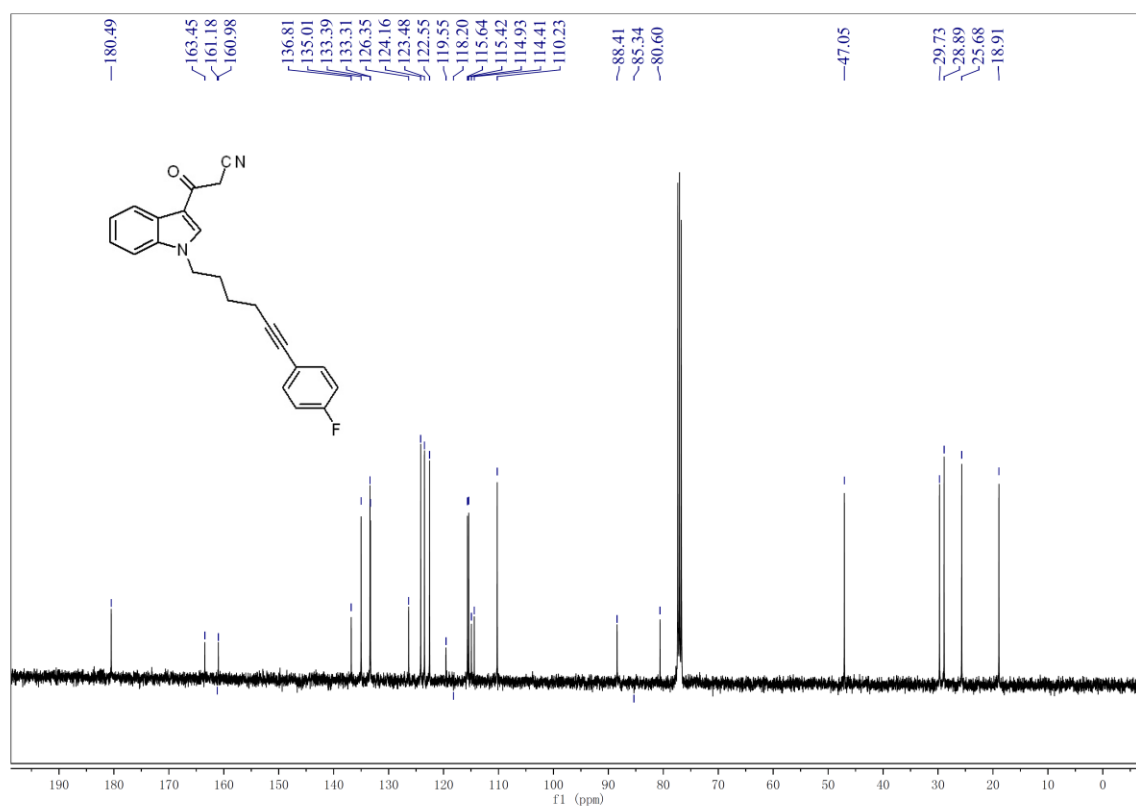

$^{19}\text{F}$  NMR spectrum of **1o** ( $\text{CDCl}_3$ , 376 MHz)

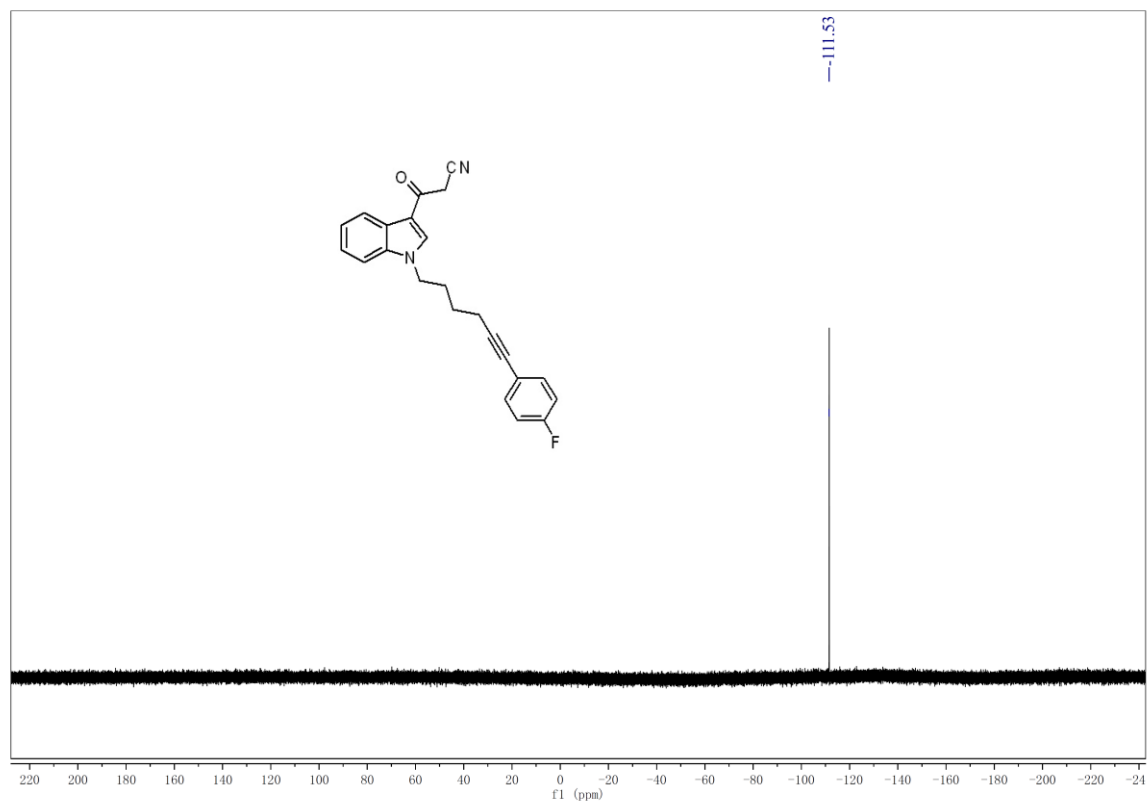

$^1\text{H}$  NMR spectrum of **1p** ( $\text{CDCl}_3$ , 400 MHz)

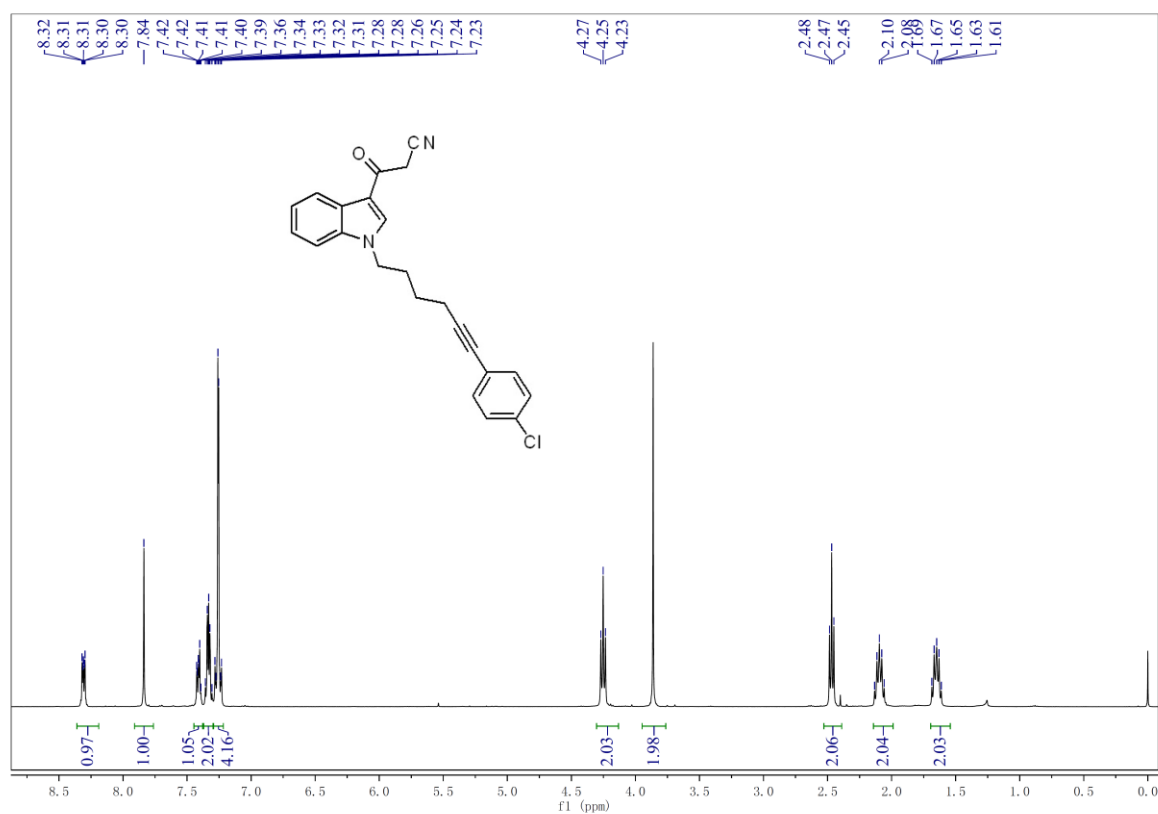

$^{13}\text{C}$  NMR spectrum of **1p** ( $\text{CDCl}_3$ , 101 MHz)

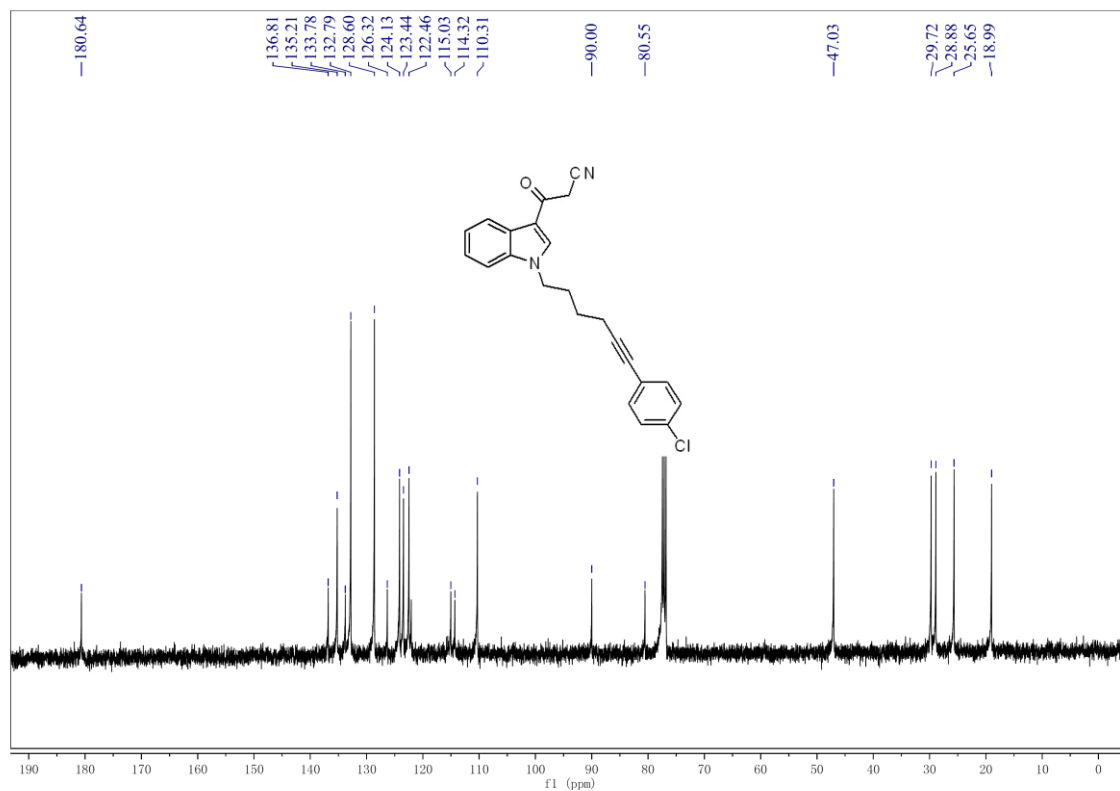

$^1\text{H}$  NMR spectrum of **1q** ( $\text{CDCl}_3$ , 400 MHz)

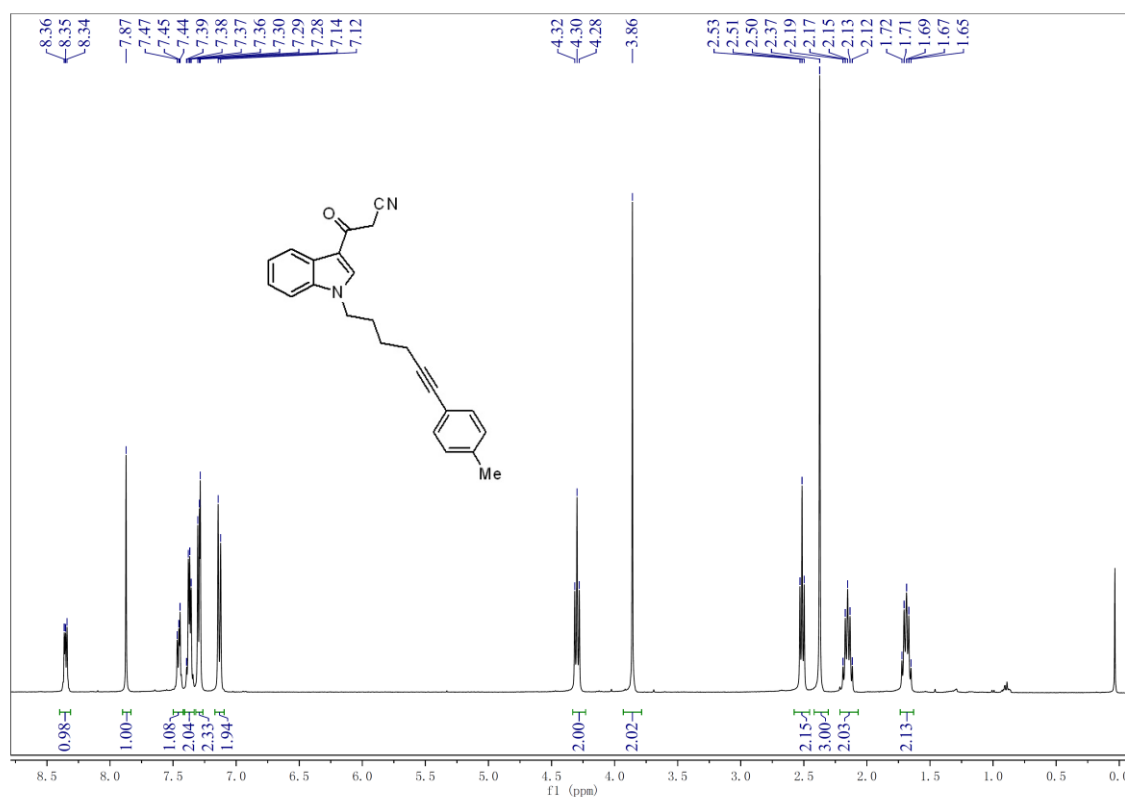

$^{13}\text{C}$  NMR spectrum of **1q** ( $\text{CDCl}_3$ , 101 MHz)

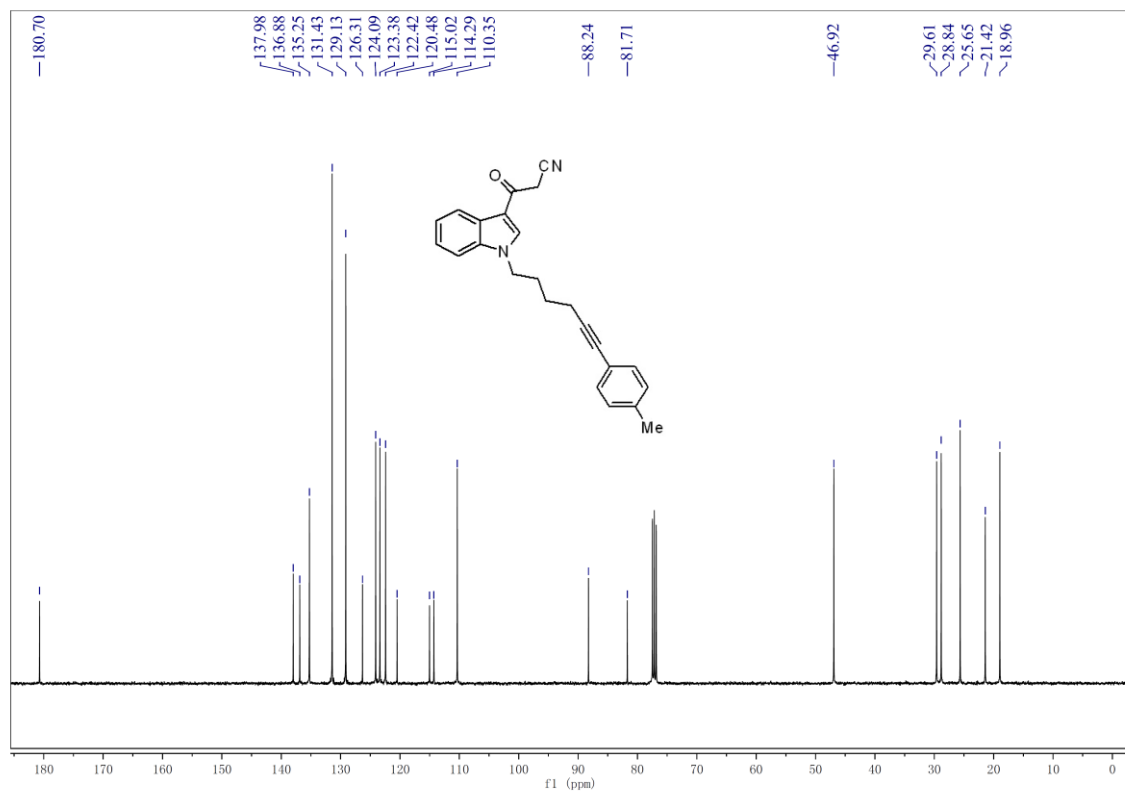



$^1\text{H}$  NMR spectrum of **1r** ( $\text{CDCl}_3$ , 400 MHz)

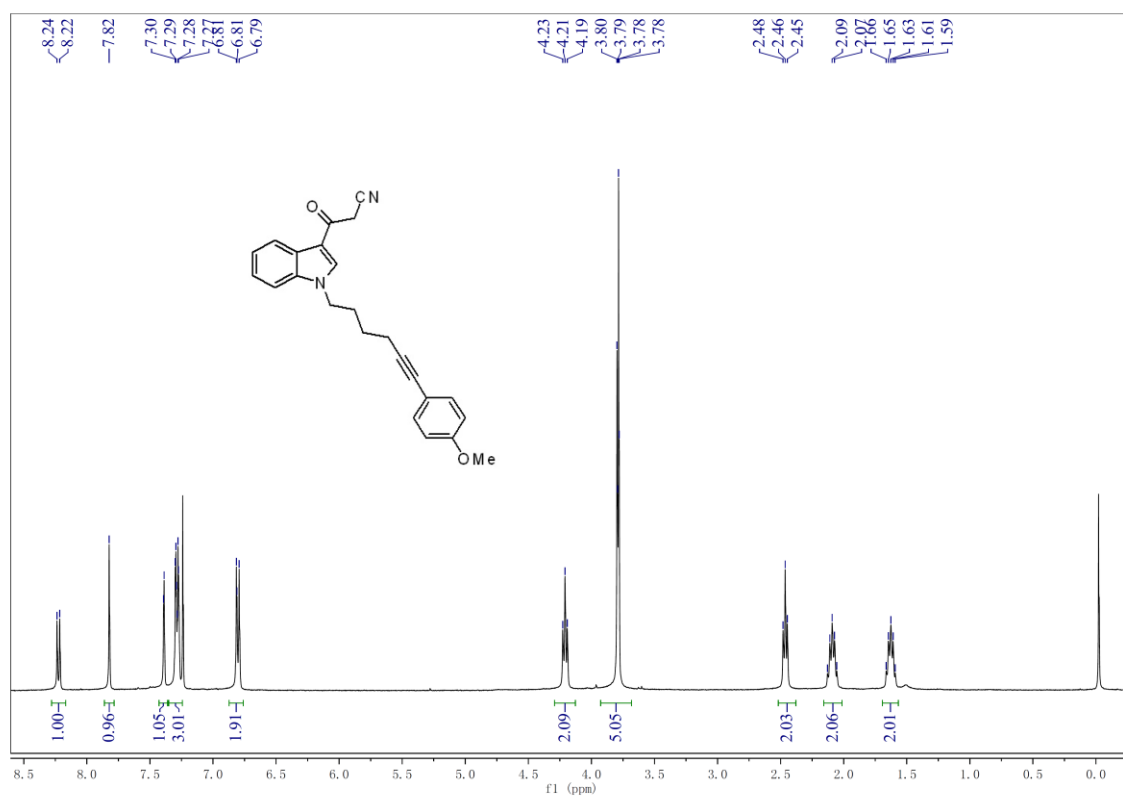

$^{13}\text{C}$  NMR spectrum of **1r** ( $\text{CDCl}_3$ , 101 MHz)

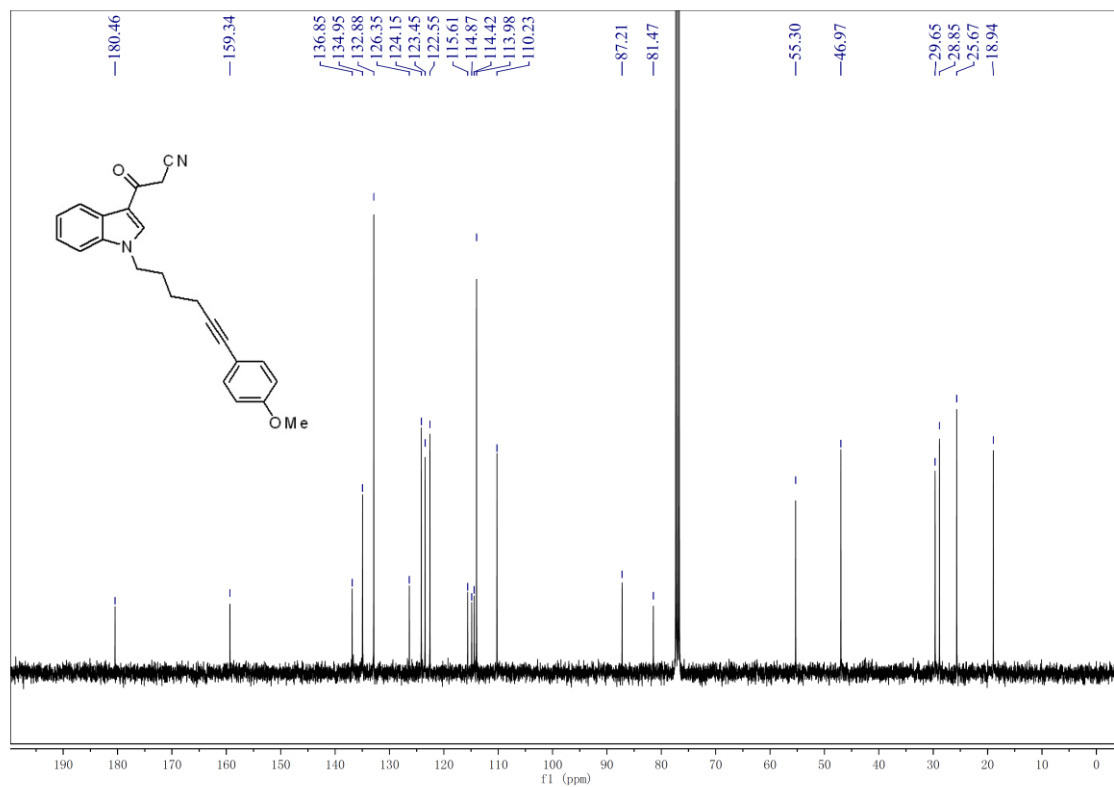

$^1\text{H}$  NMR spectrum of **1s** ( $\text{CDCl}_3$ , 400 MHz)

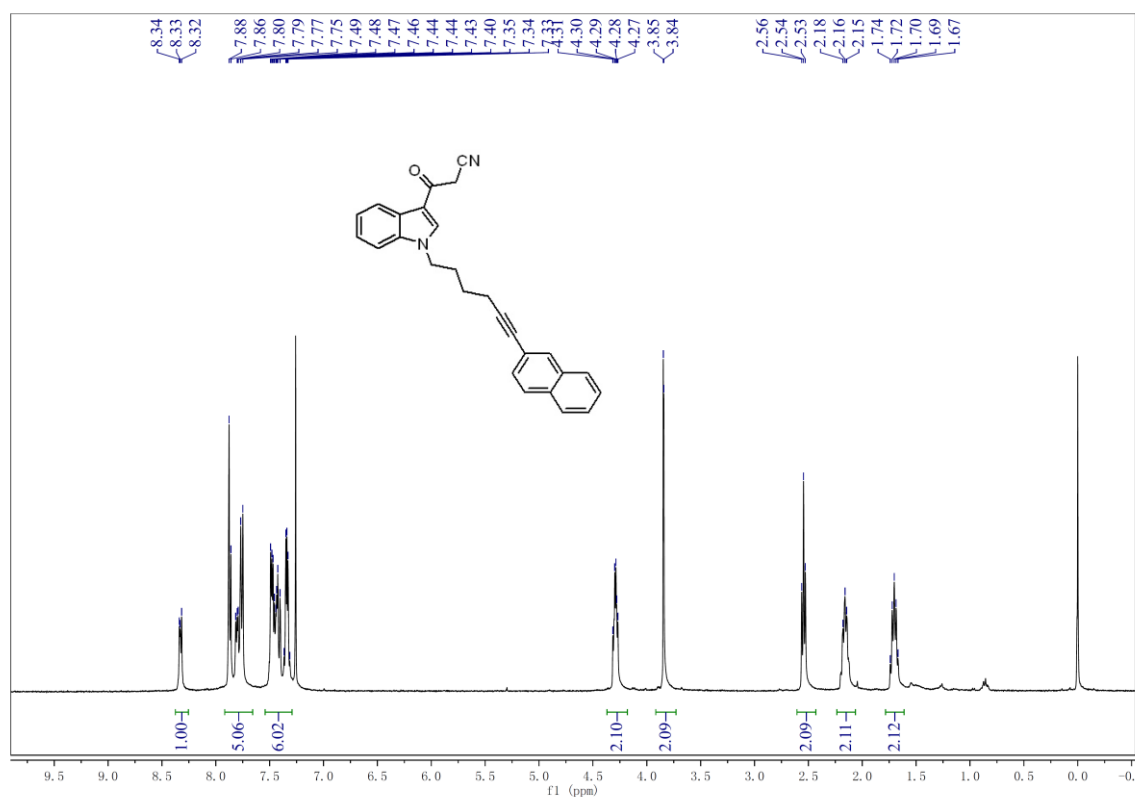

$^{13}\text{C}$  NMR spectrum of **1s** ( $\text{CDCl}_3$ , 101 MHz)

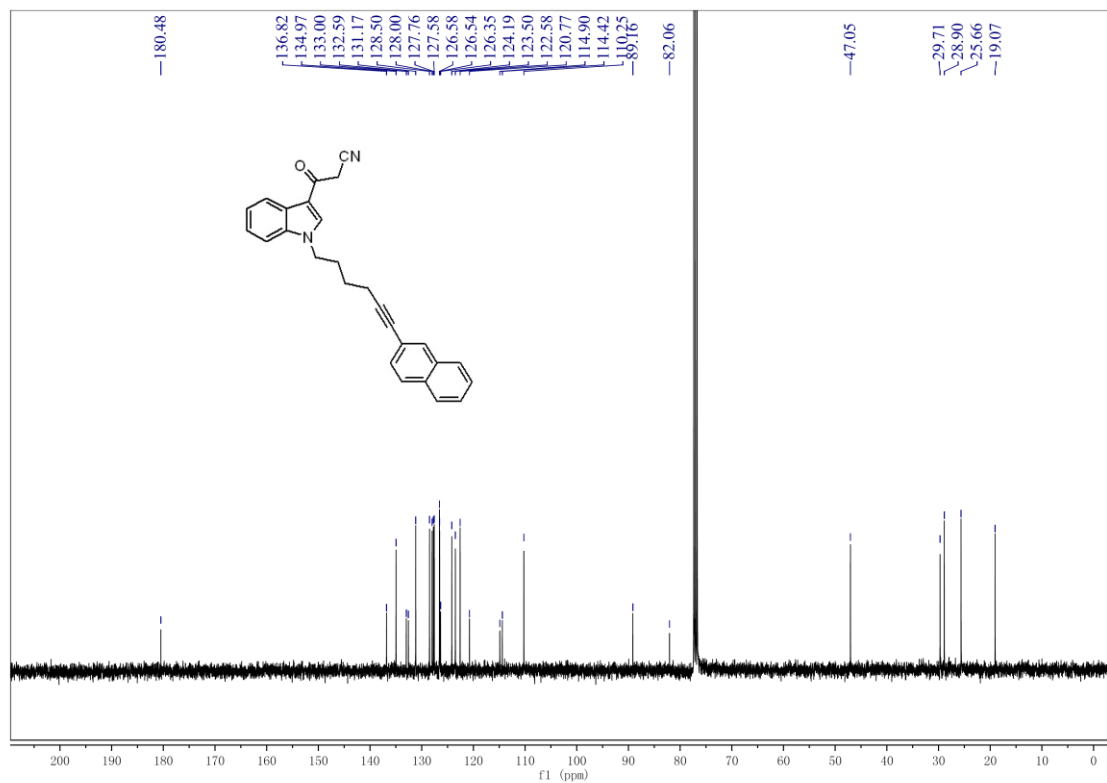

$^1\text{H}$  NMR spectrum of **1t** ( $\text{CDCl}_3$ , 400 MHz)

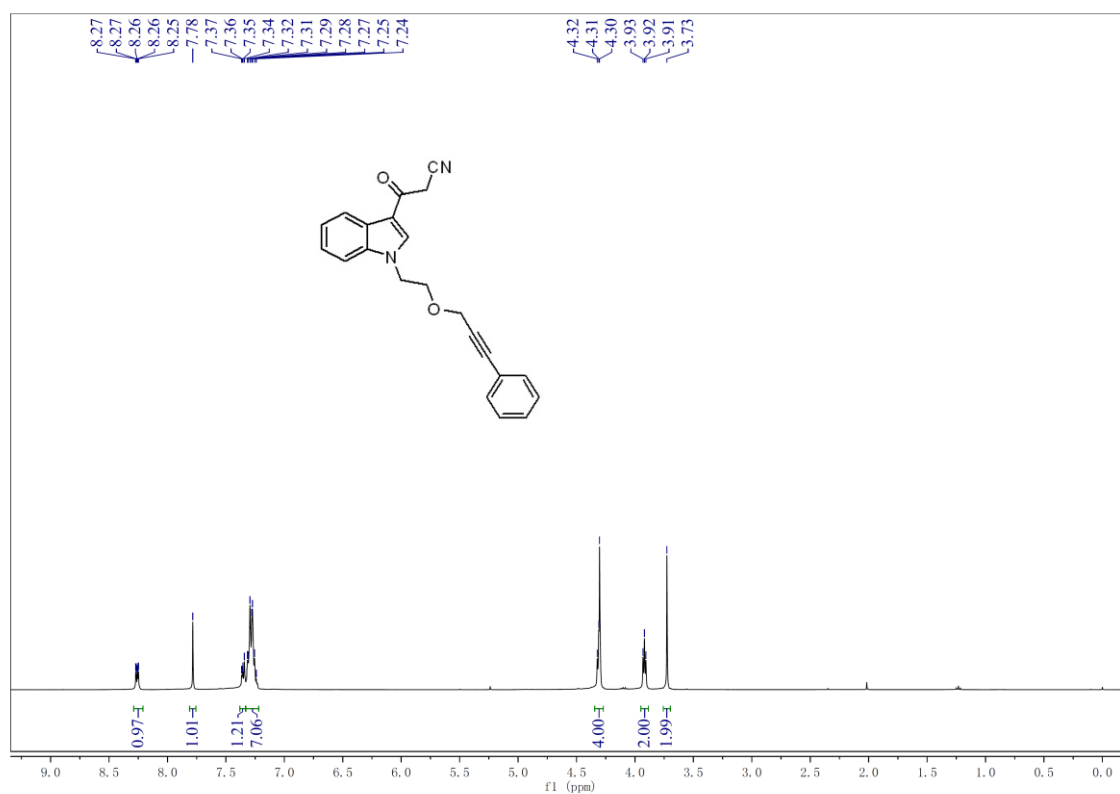

$^{13}\text{C}$  NMR spectrum of **1t** ( $\text{CDCl}_3$ , 101 MHz)

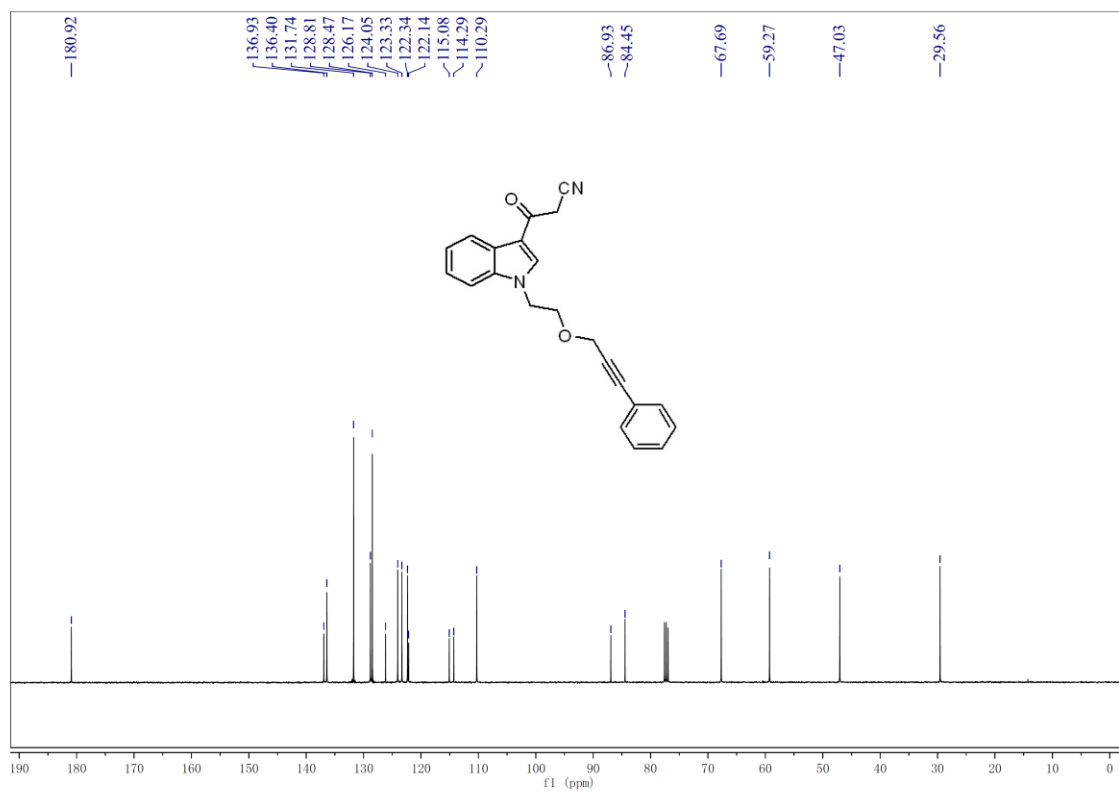

$^1\text{H}$  NMR spectrum of **1u** ( $\text{CDCl}_3$ , 400 MHz)

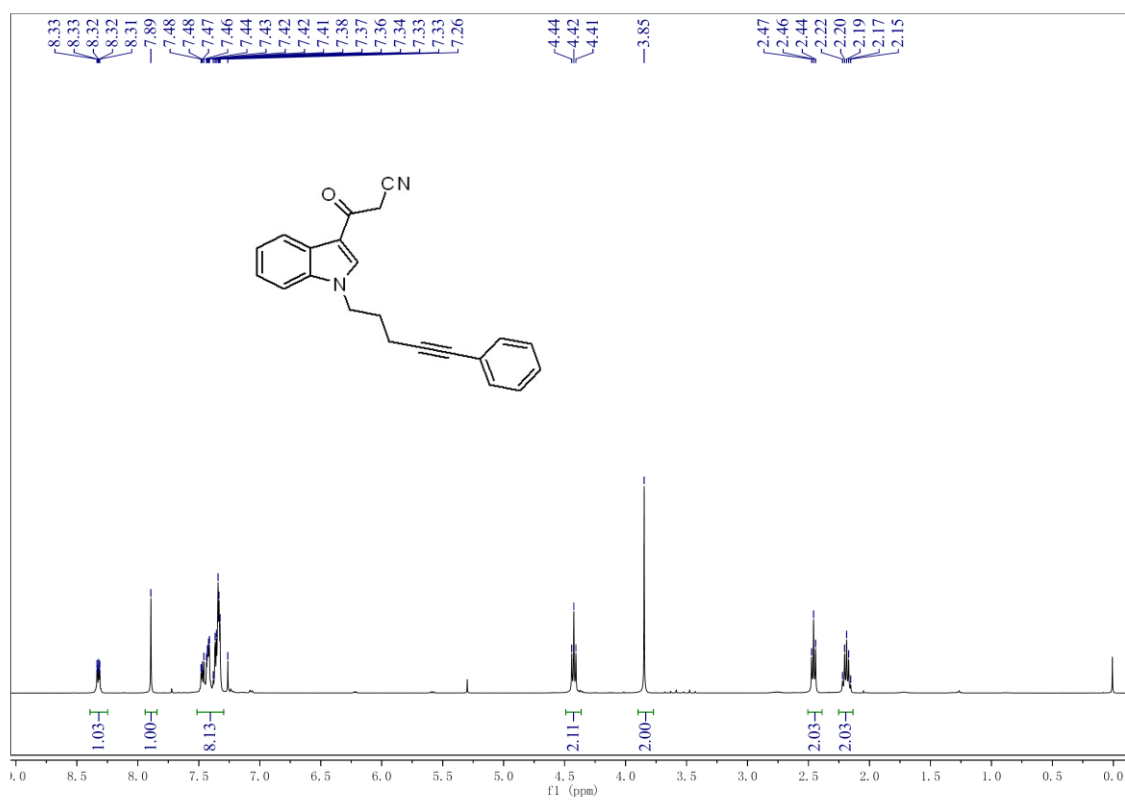

$^{13}\text{C}$  NMR spectrum of **1u** ( $\text{CDCl}_3$ , 101 MHz)

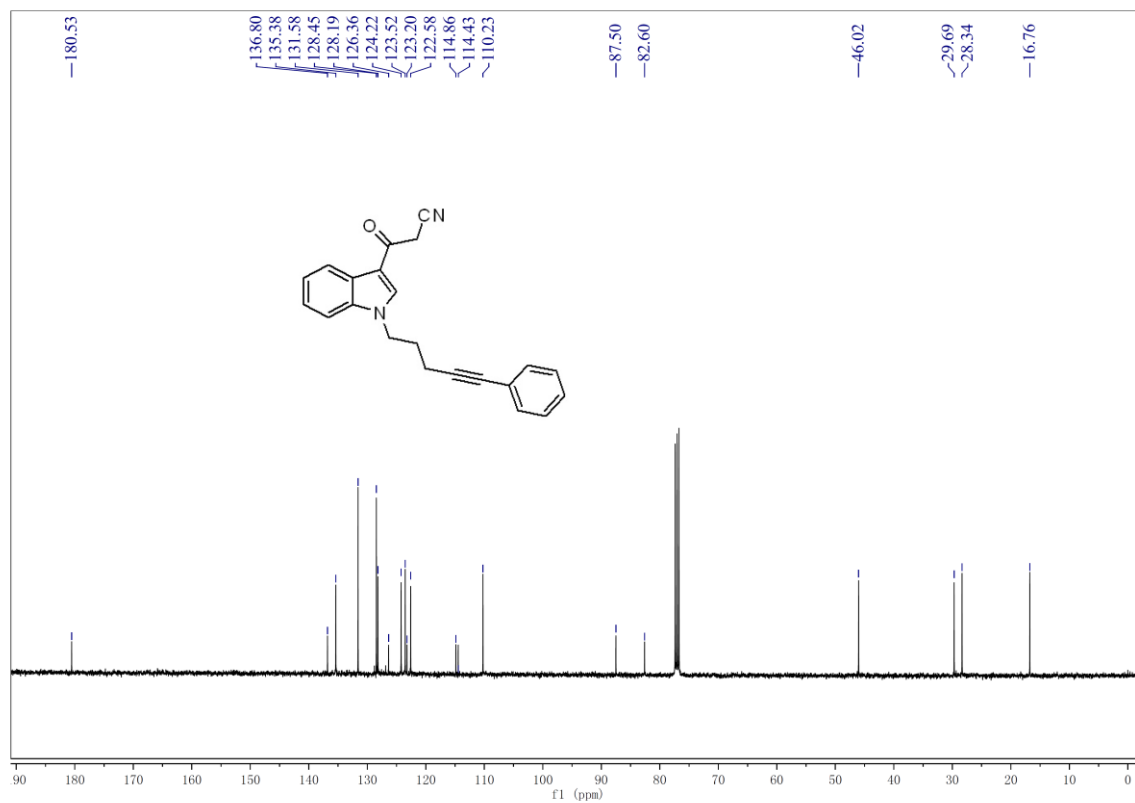

$^1\text{H}$  NMR spectrum of **1v** ( $\text{CDCl}_3$ , 400 MHz)

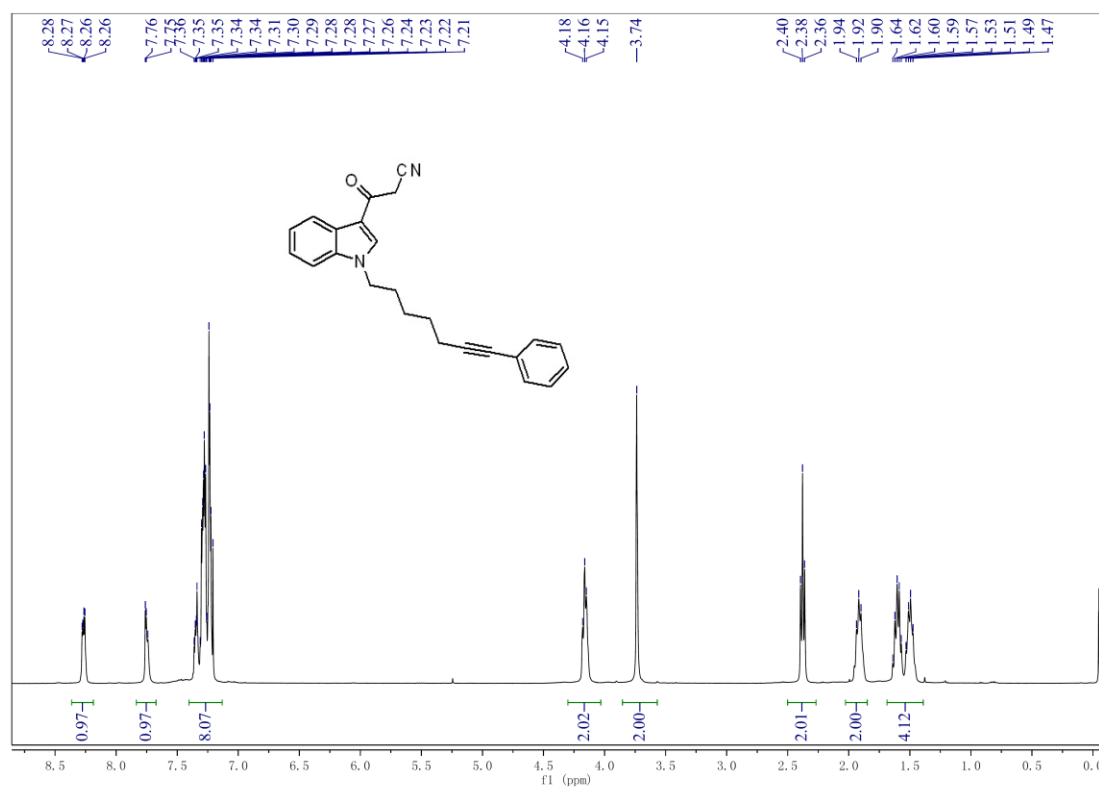

$^{13}\text{C}$  NMR spectrum of **1v** ( $\text{CDCl}_3$ , 101 MHz)

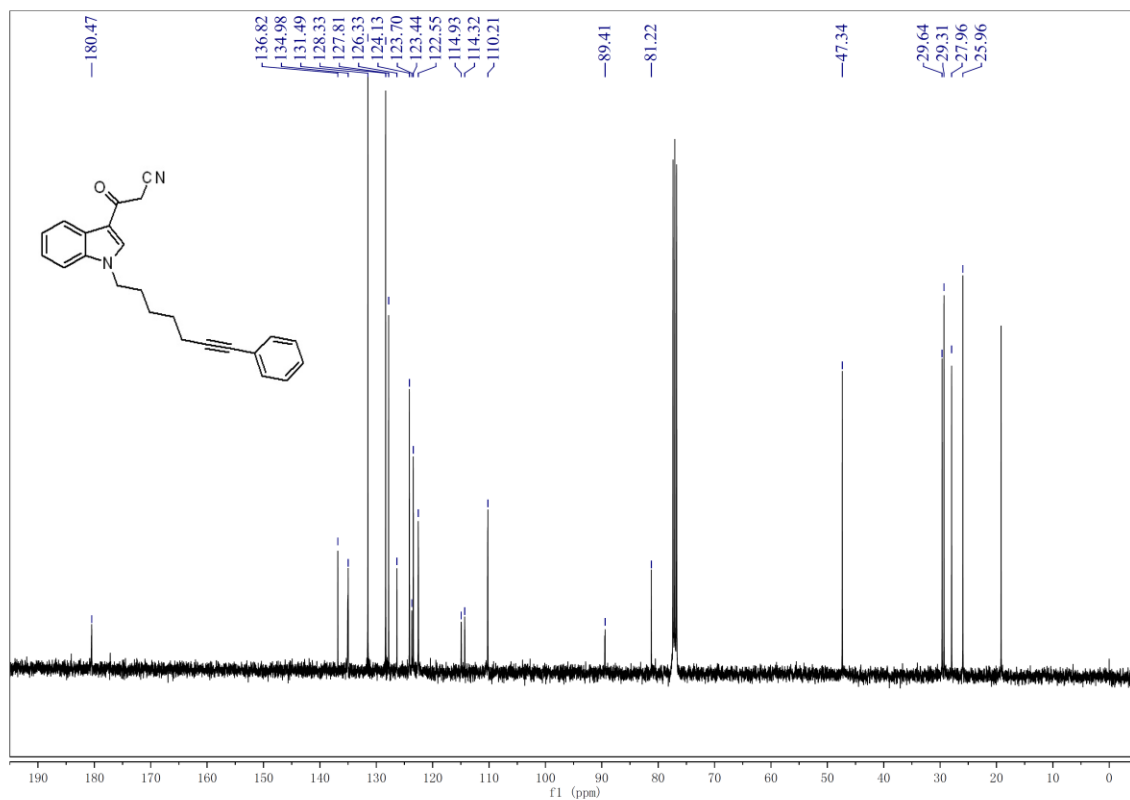

$^1\text{H}$  NMR spectrum of **2a** (DMSO- $d_6$ , 400 MHz)

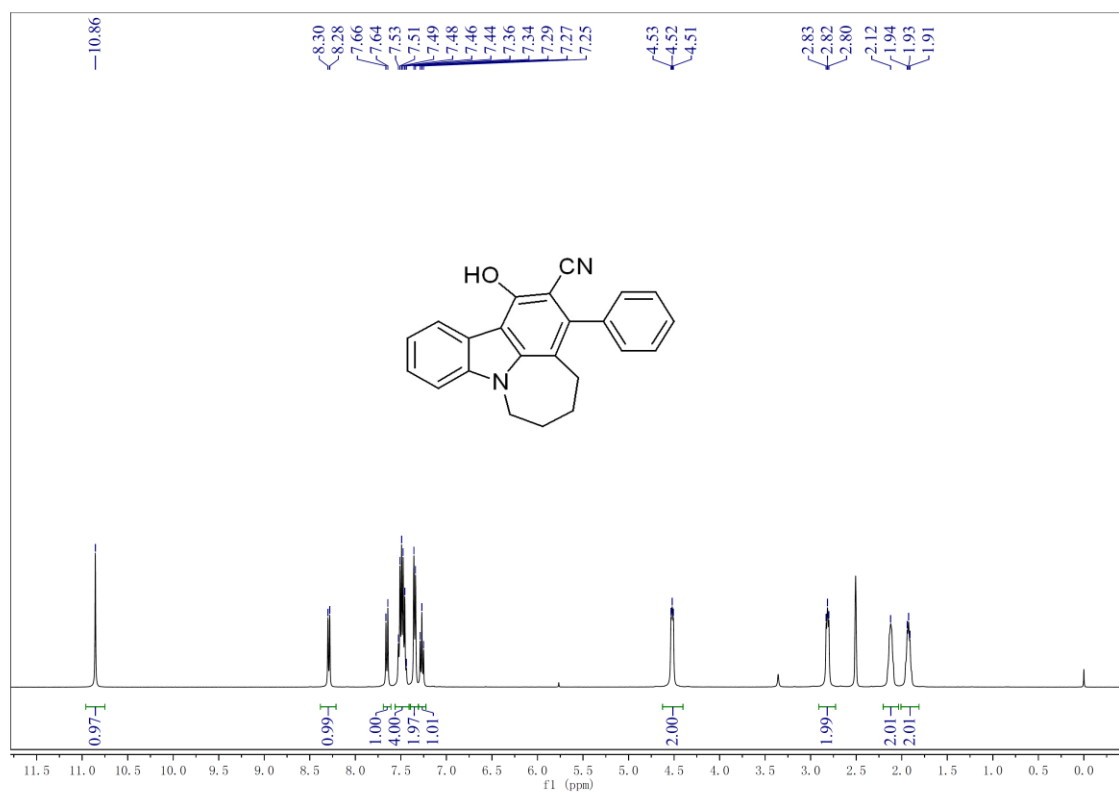

$^{13}\text{C}$  NMR spectrum of **2a** (DMSO- $d_6$ , 101 MHz)

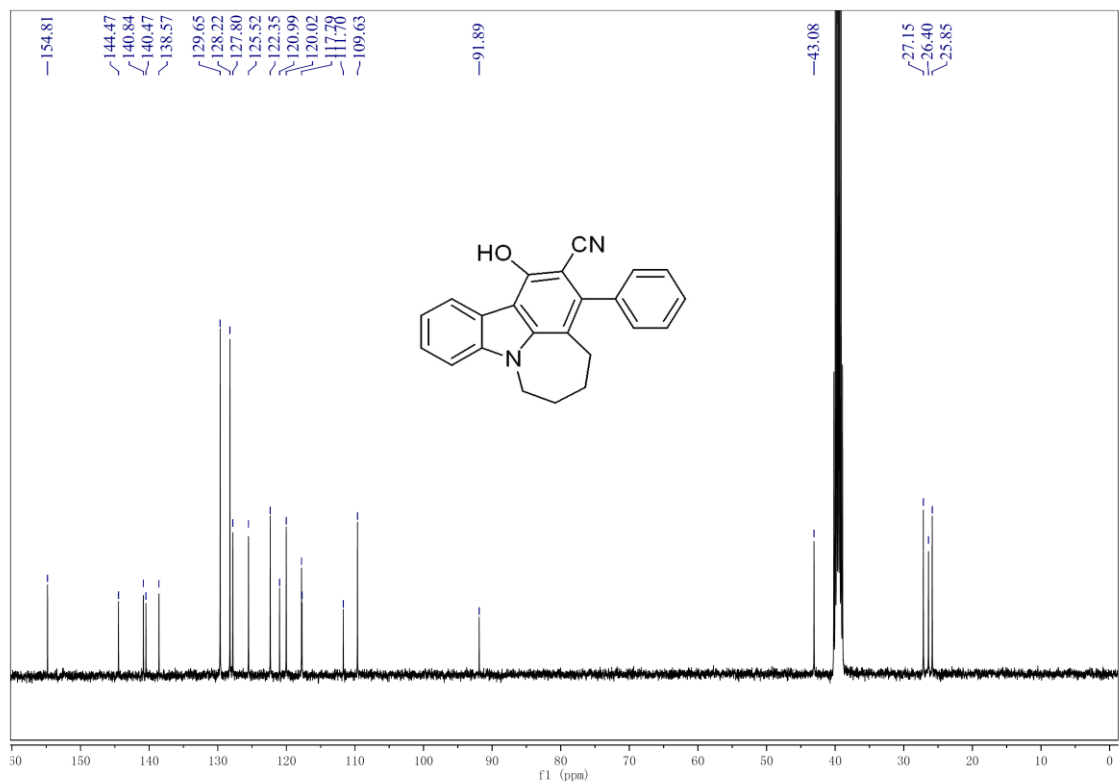

$^1\text{H}$  NMR spectrum of **2b** (DMSO- $d_6$ , 400 MHz)

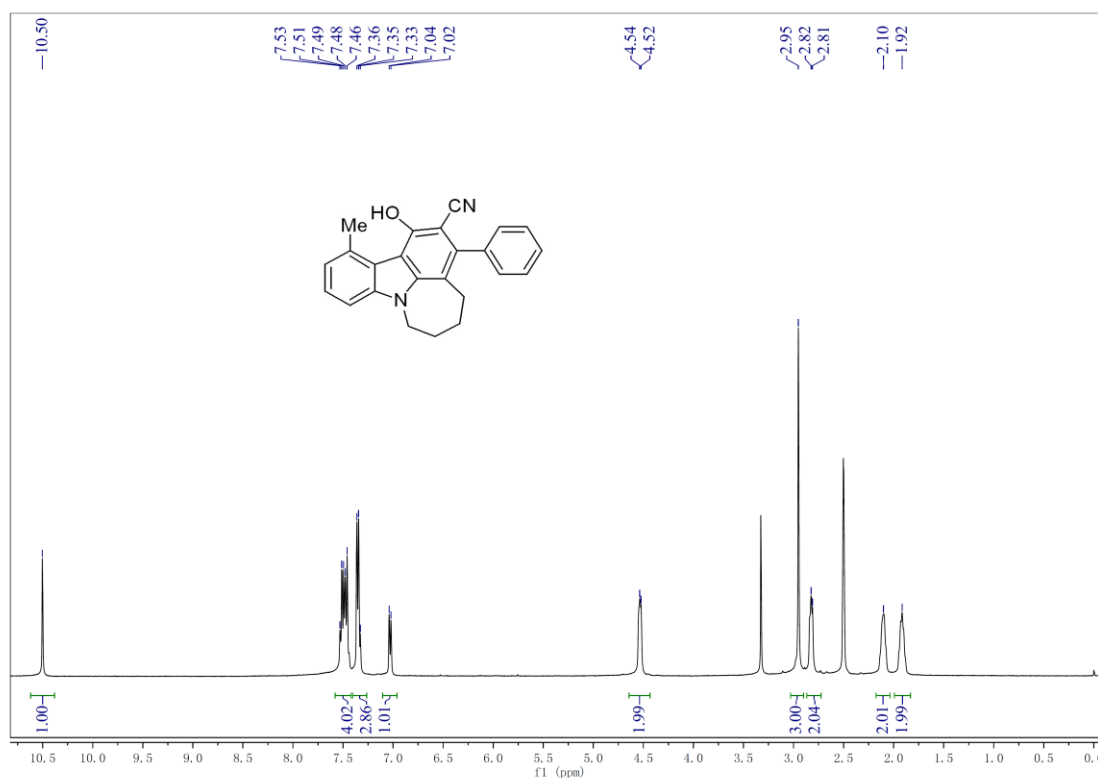

$^{13}\text{C}$  NMR spectrum of **2b** (DMSO- $d_6$ , 101 MHz)

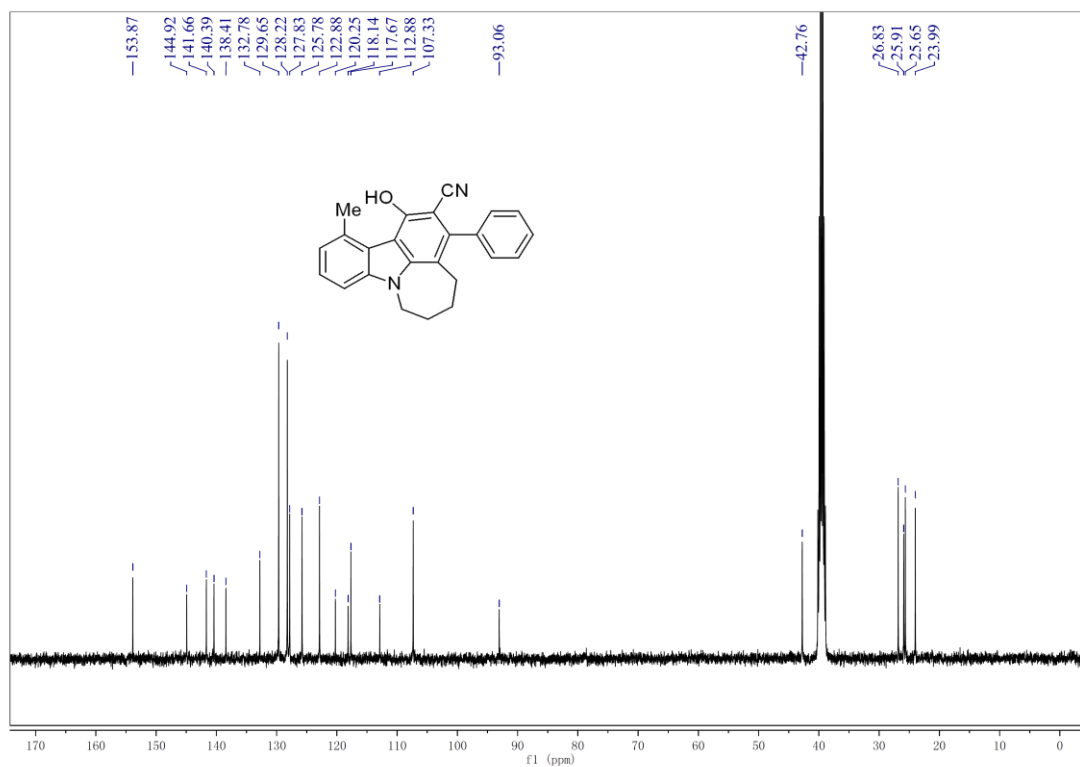

$^1\text{H}$  NMR spectrum of **2c** (DMSO- $d_6$ , 400 MHz)

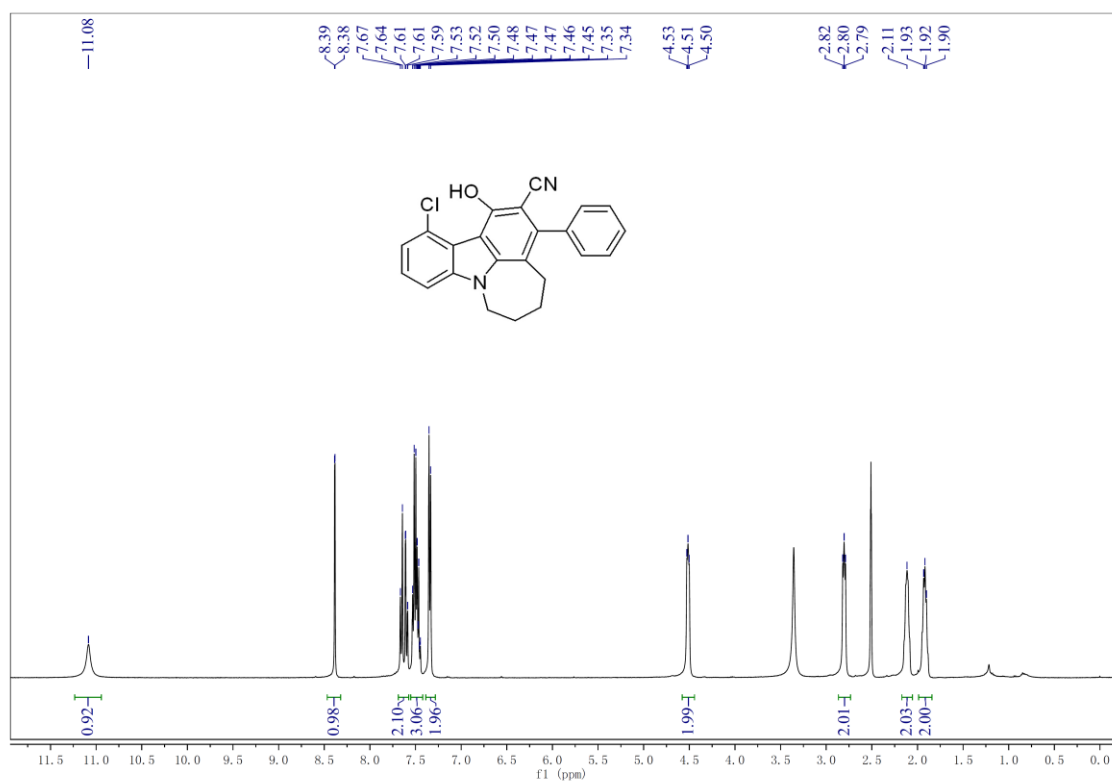

$^{13}\text{C}$  NMR spectrum of **2c** (DMSO- $d_6$ , 101 MHz)

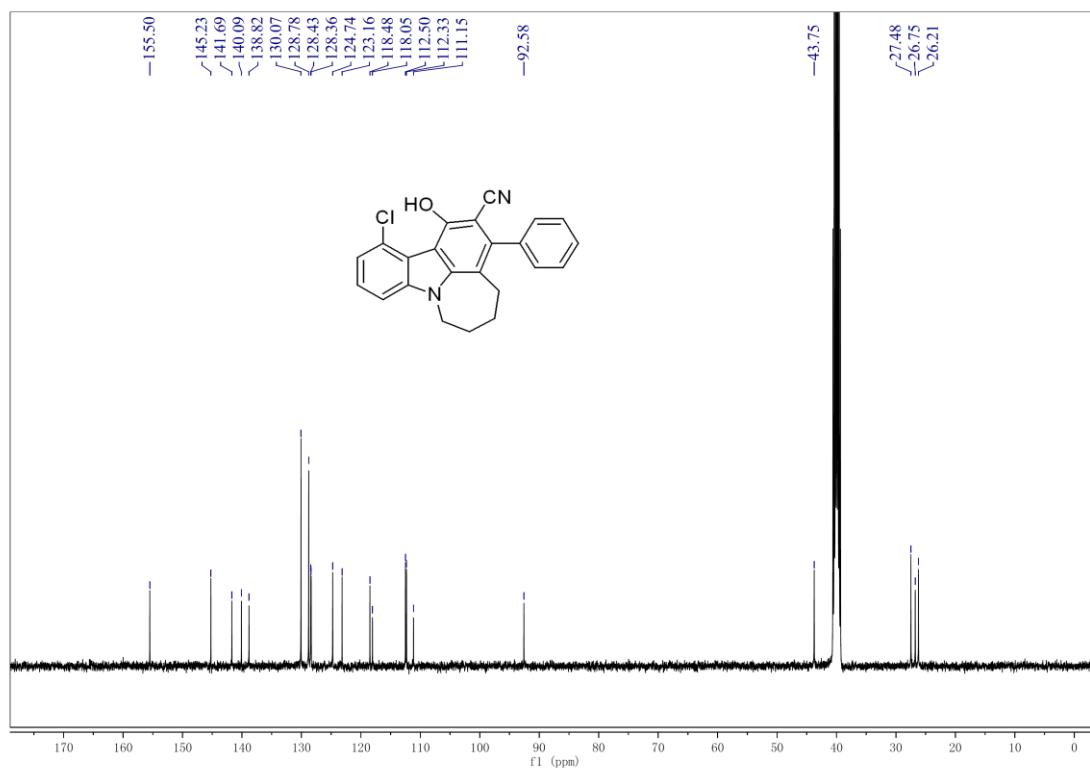



$^1\text{H}$  NMR spectrum of **2d** (DMSO- $d_6$ , 400 MHz)

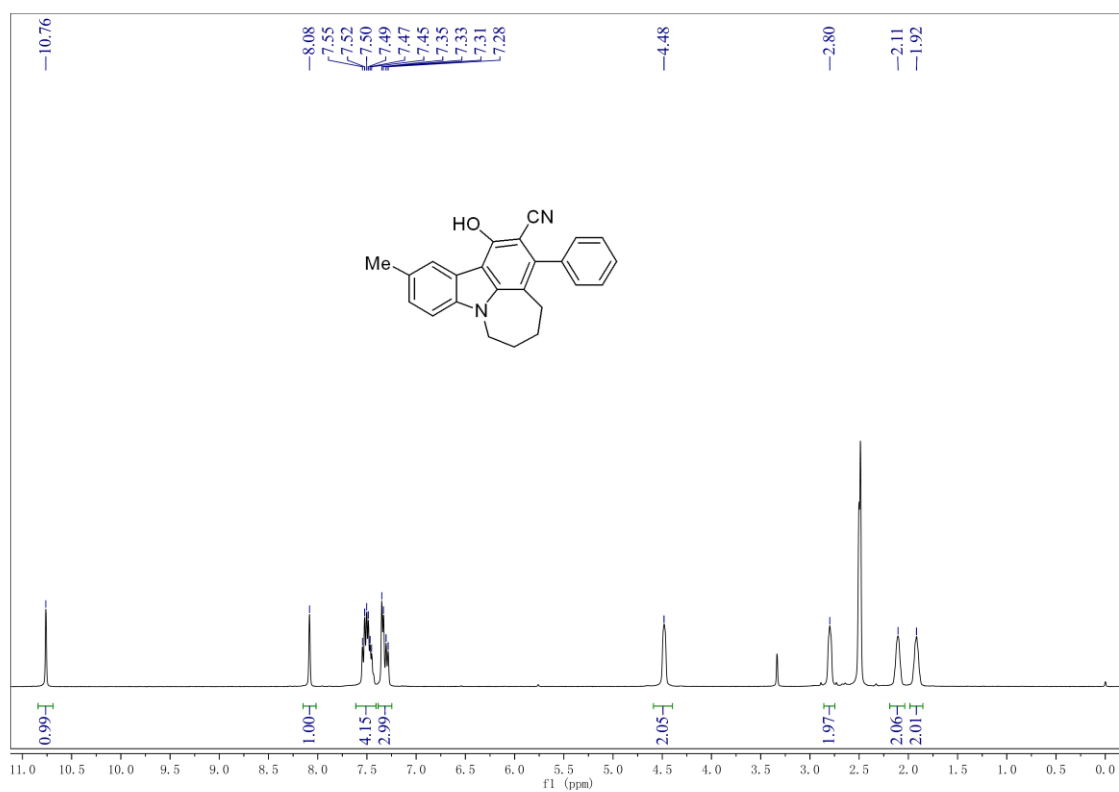

$^{13}\text{C}$  NMR spectrum of **2d** (DMSO- $d_6$ , 101 MHz)

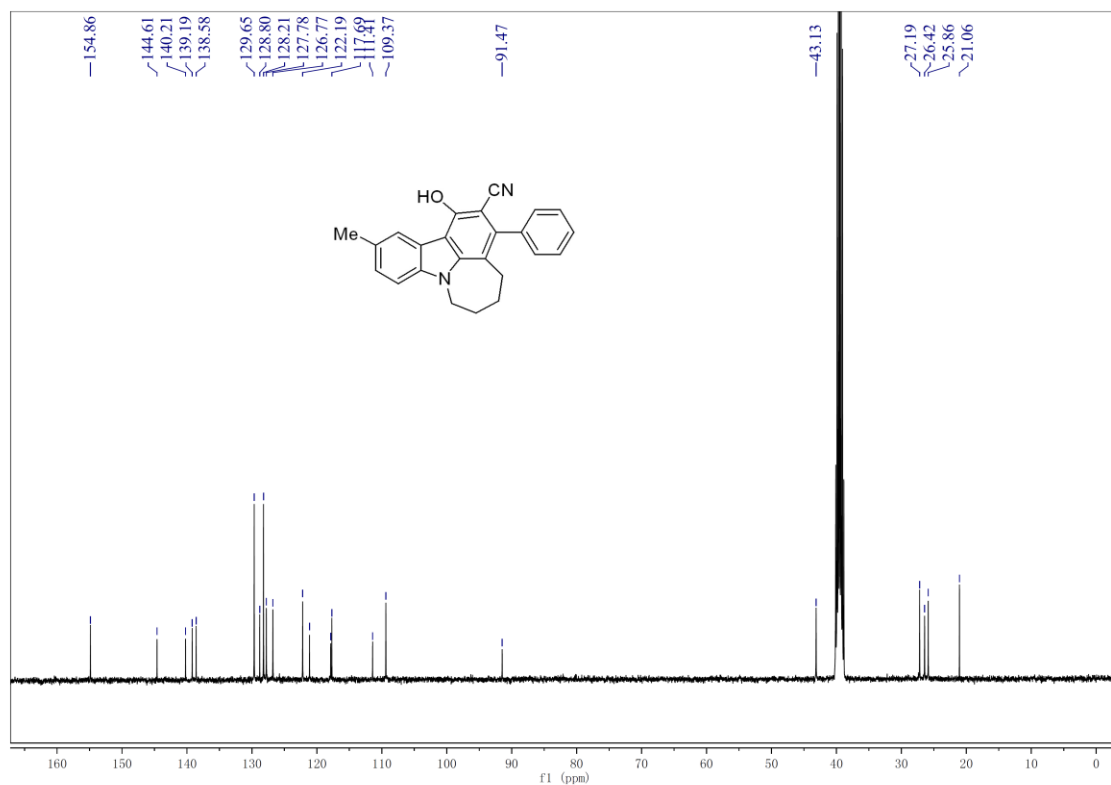

$^1\text{H}$  NMR spectrum of **2e** (DMSO- $d_6$ , 400 MHz)

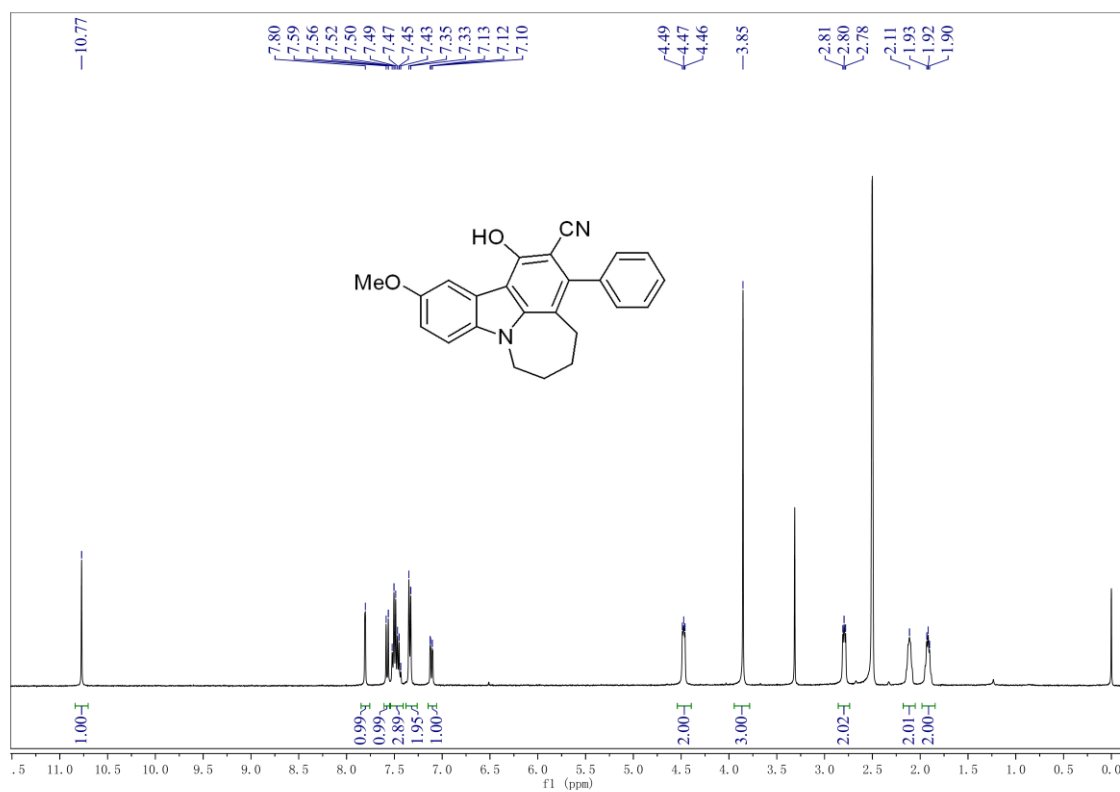

$^{13}\text{C}$  NMR spectrum of **2e** (DMSO- $d_6$ , 101 MHz)

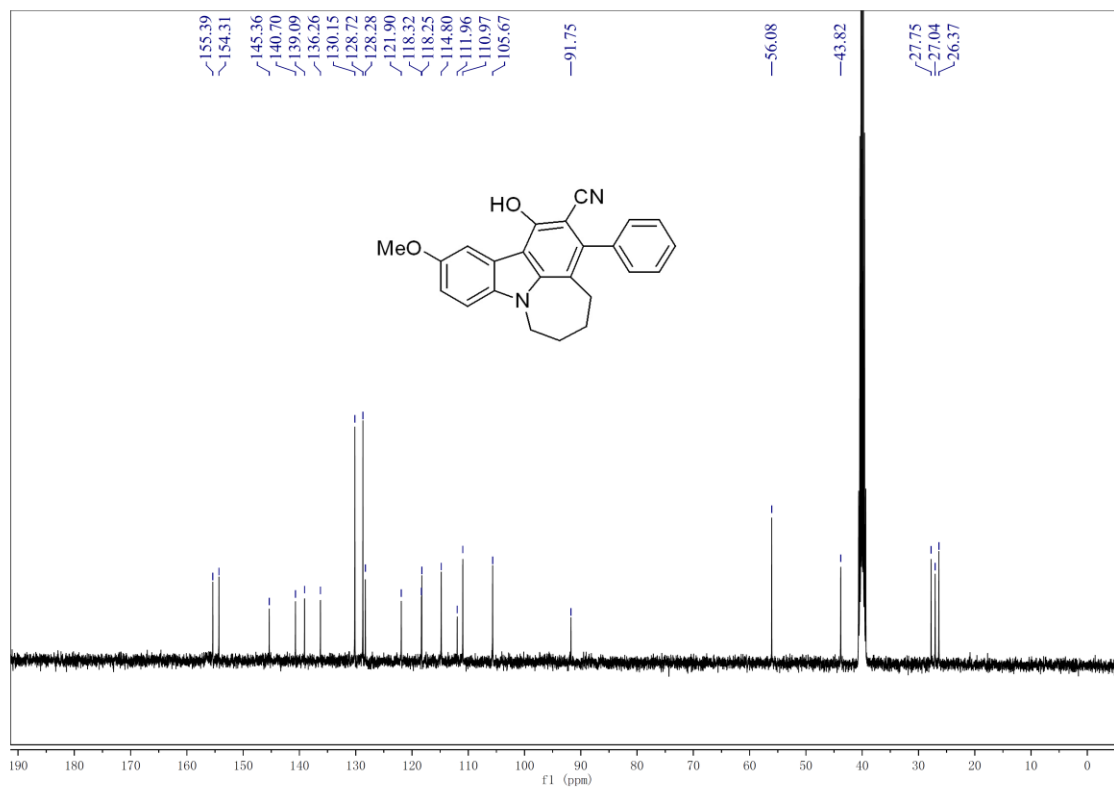

$^1\text{H}$  NMR spectrum of **2f** (DMSO- $d_6$ , 400 MHz)

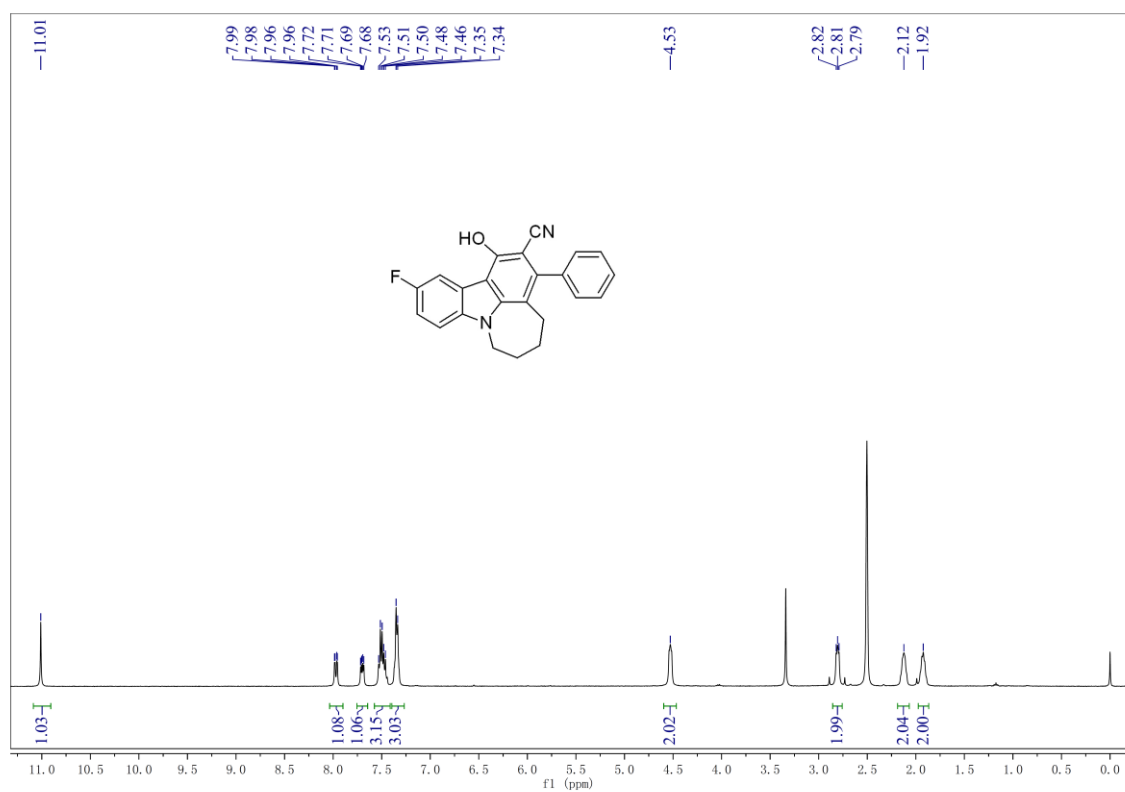

$^{13}\text{C}$  NMR spectrum of **2f** (DMSO- $d_6$ , 101 MHz)

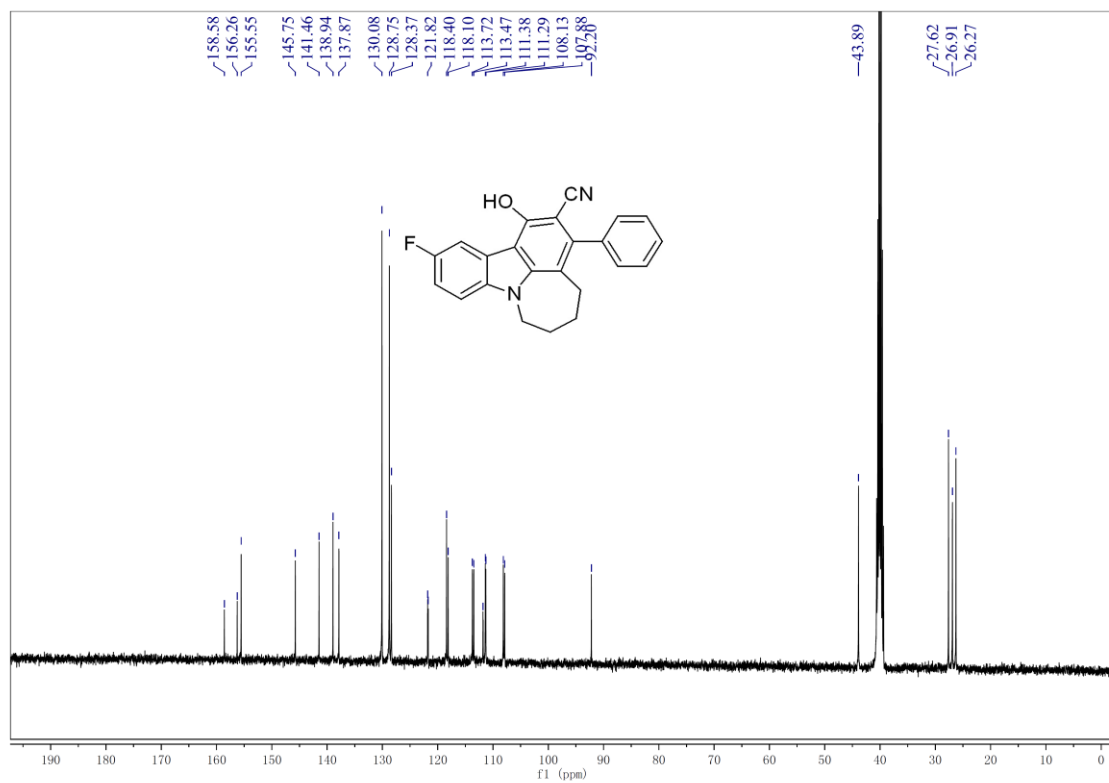

$^{19}\text{F}$  NMR spectrum of **2f** (DMSO- $d_6$ , 376 MHz)

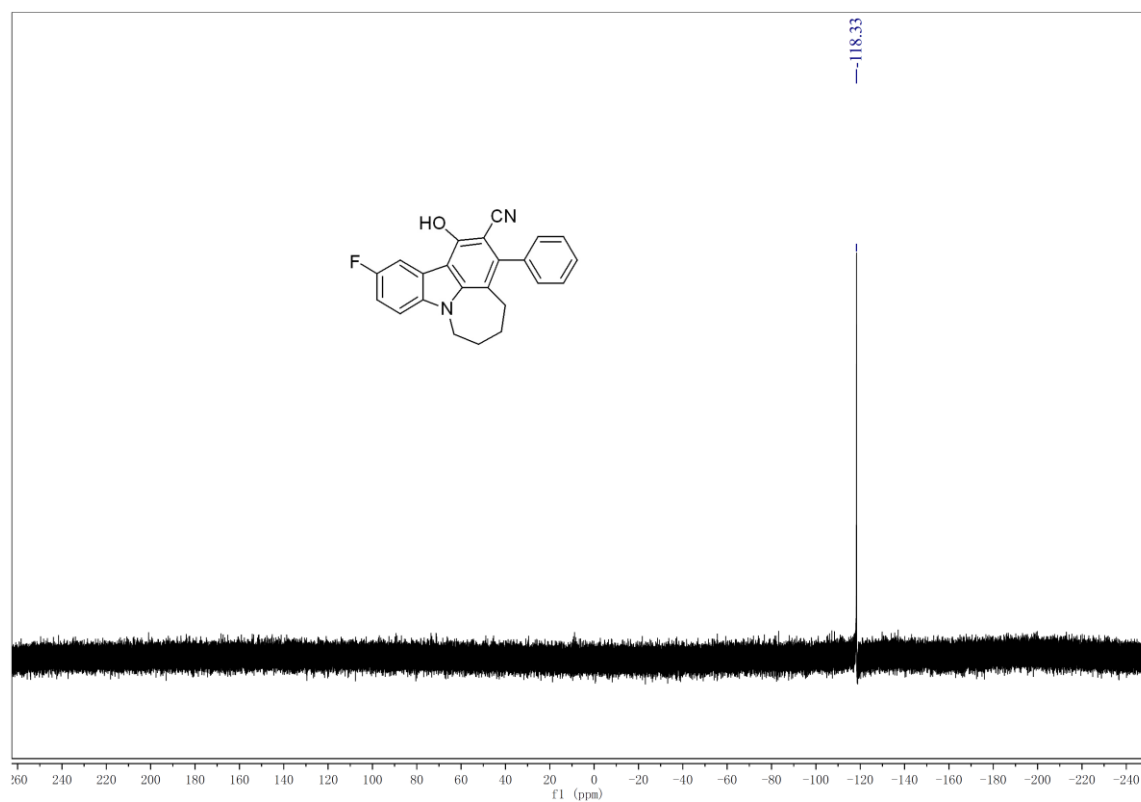

$^1\text{H}$  NMR spectrum of **2g** (DMSO- $d_6$ , 400 MHz)

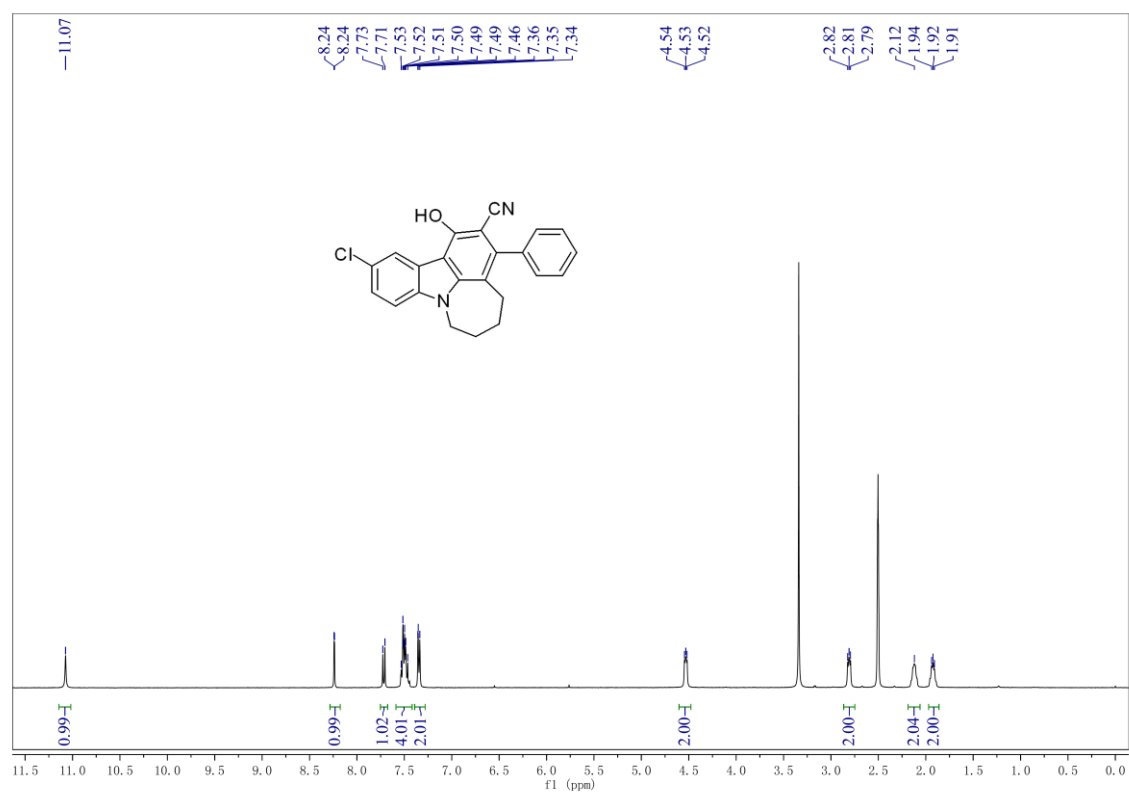

$^{13}\text{C}$  NMR spectrum of **2g** (DMSO- $d_6$ , 101 MHz)

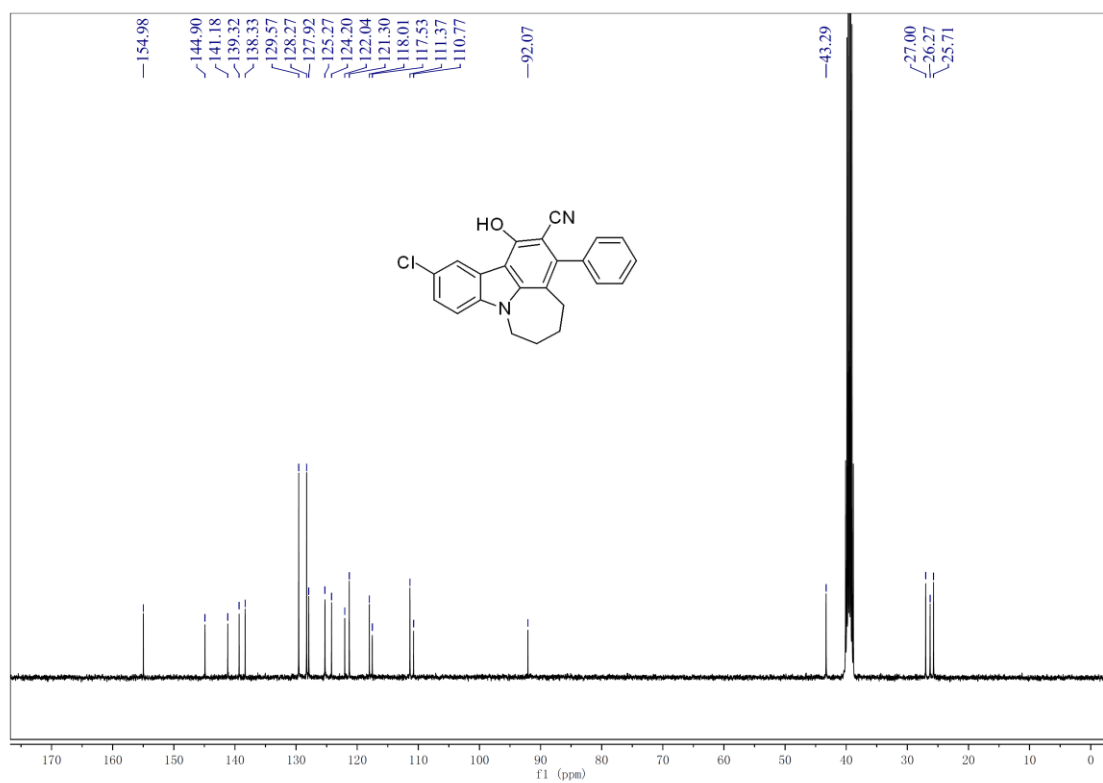

$^1\text{H}$  NMR spectrum of **2h** (DMSO- $d_6$ , 400 MHz)

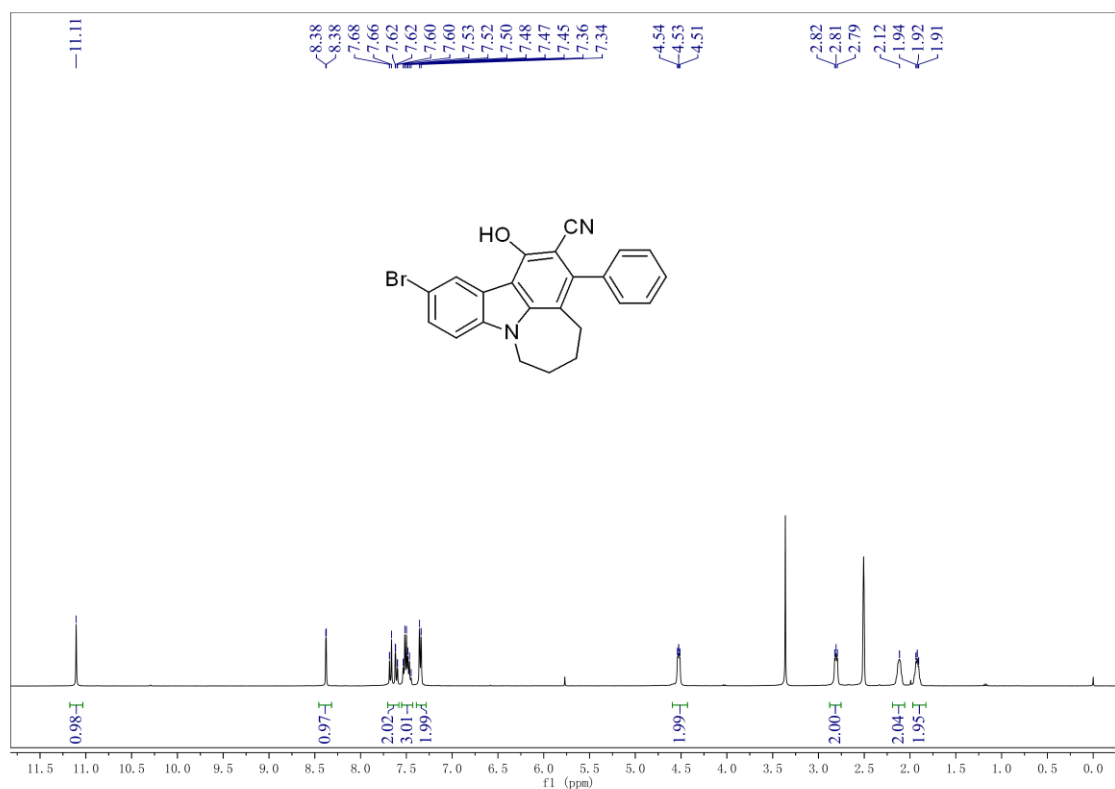

$^{13}\text{C}$  NMR spectrum of **2h** (DMSO- $d_6$ , 101 MHz)

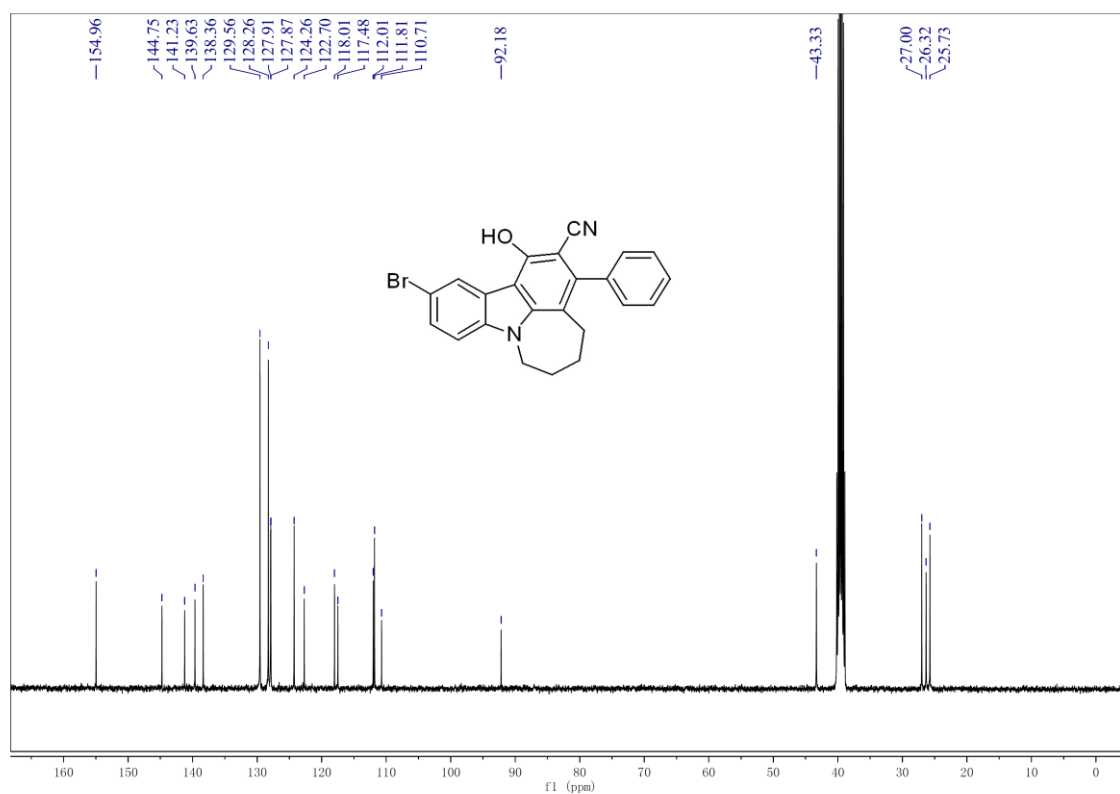

$^1\text{H}$  NMR spectrum of **2i** (DMSO- $d_6$ , 400 MHz)

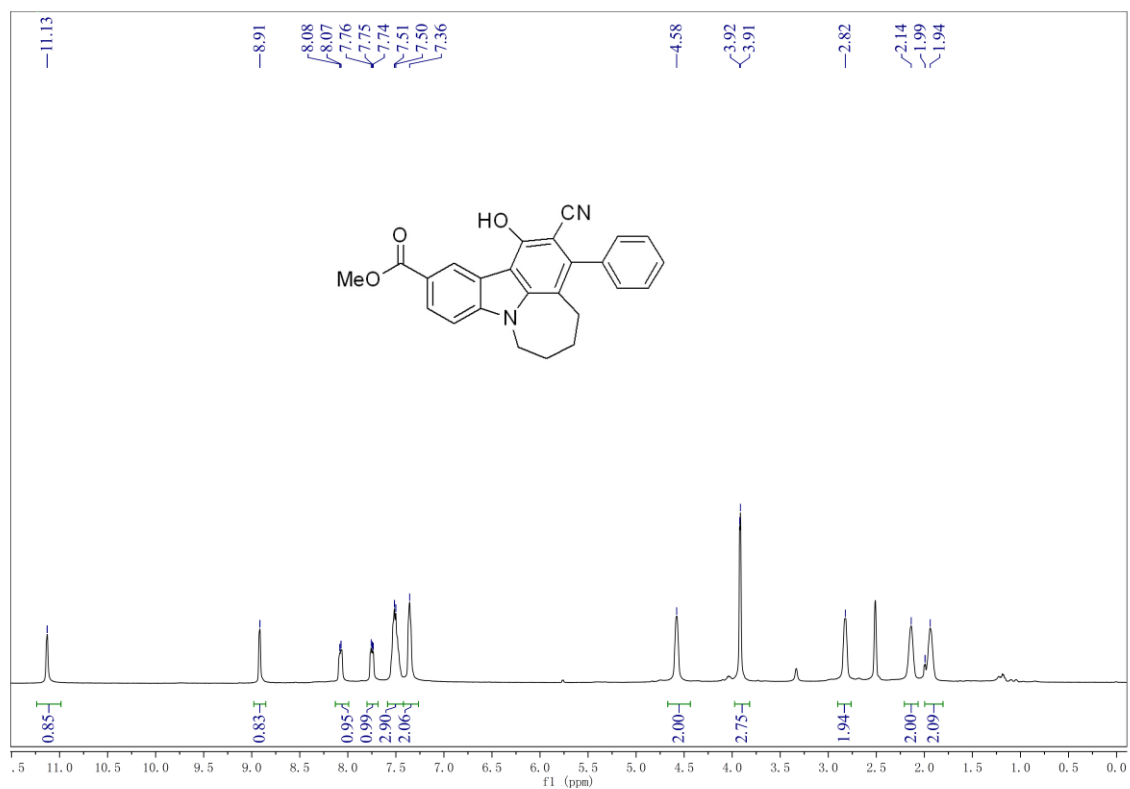

$^{13}\text{C}$  NMR spectrum of **2i** (DMSO- $d_6$ , 101 MHz)

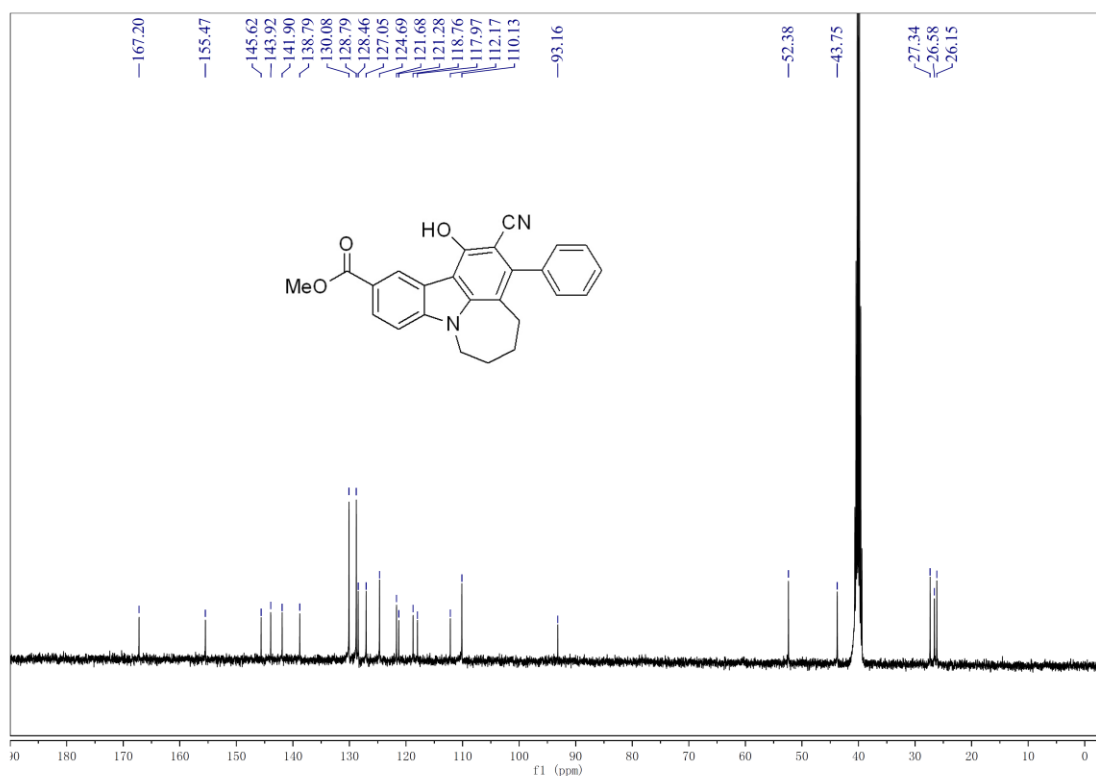

$^1\text{H}$  NMR spectrum of **2j** (DMSO- $d_6$ , 400 MHz)

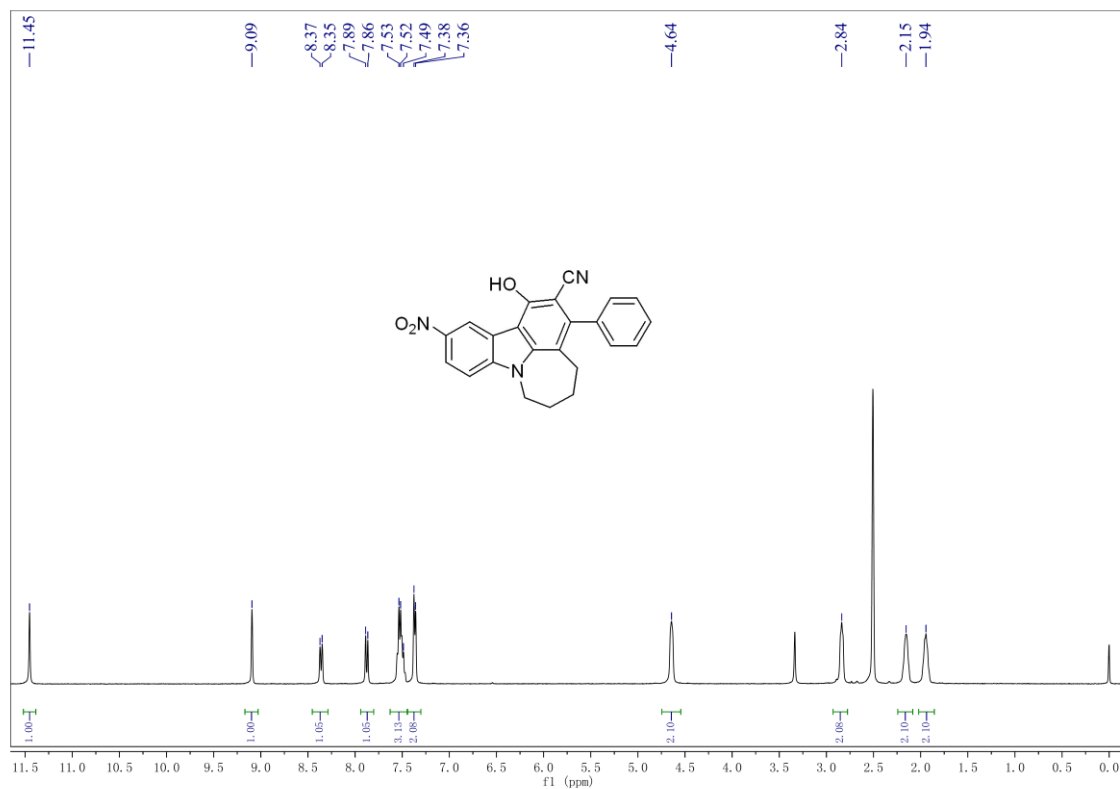

$^{13}\text{C}$  NMR spectrum of **2j** (DMSO- $d_6$ , 101 MHz)

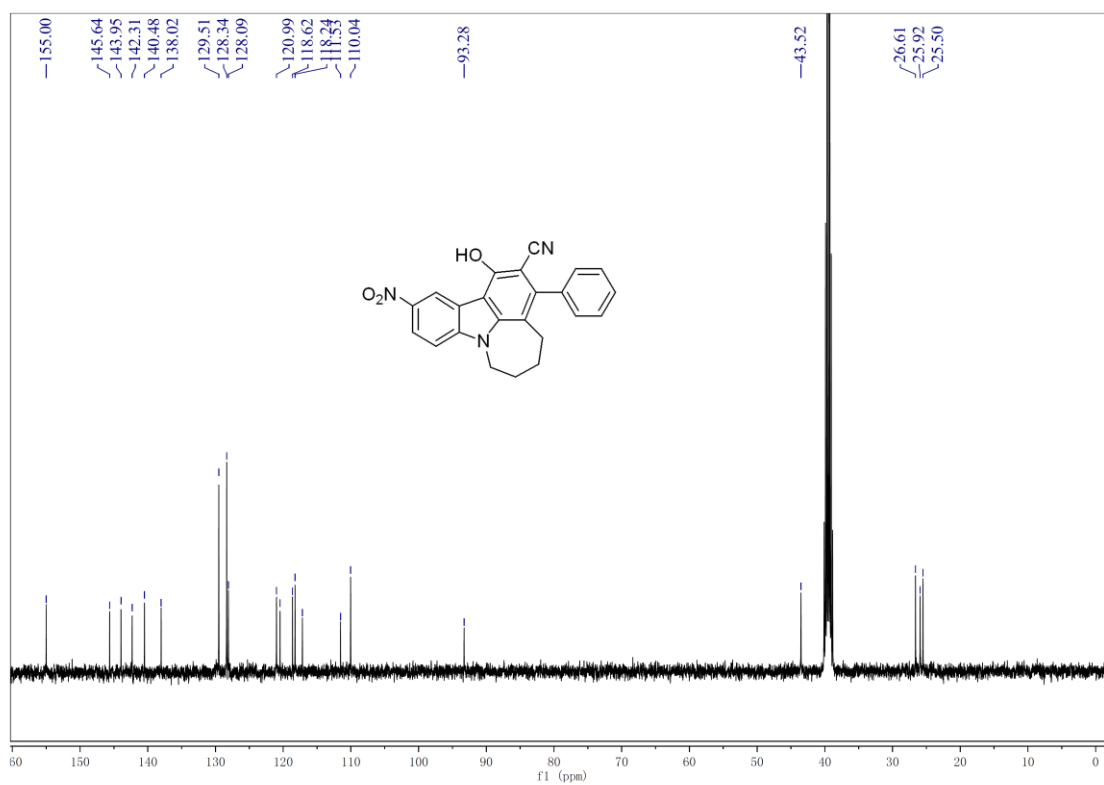

$^1\text{H}$  NMR spectrum of **2k** (DMSO- $d_6$ , 400 MHz)

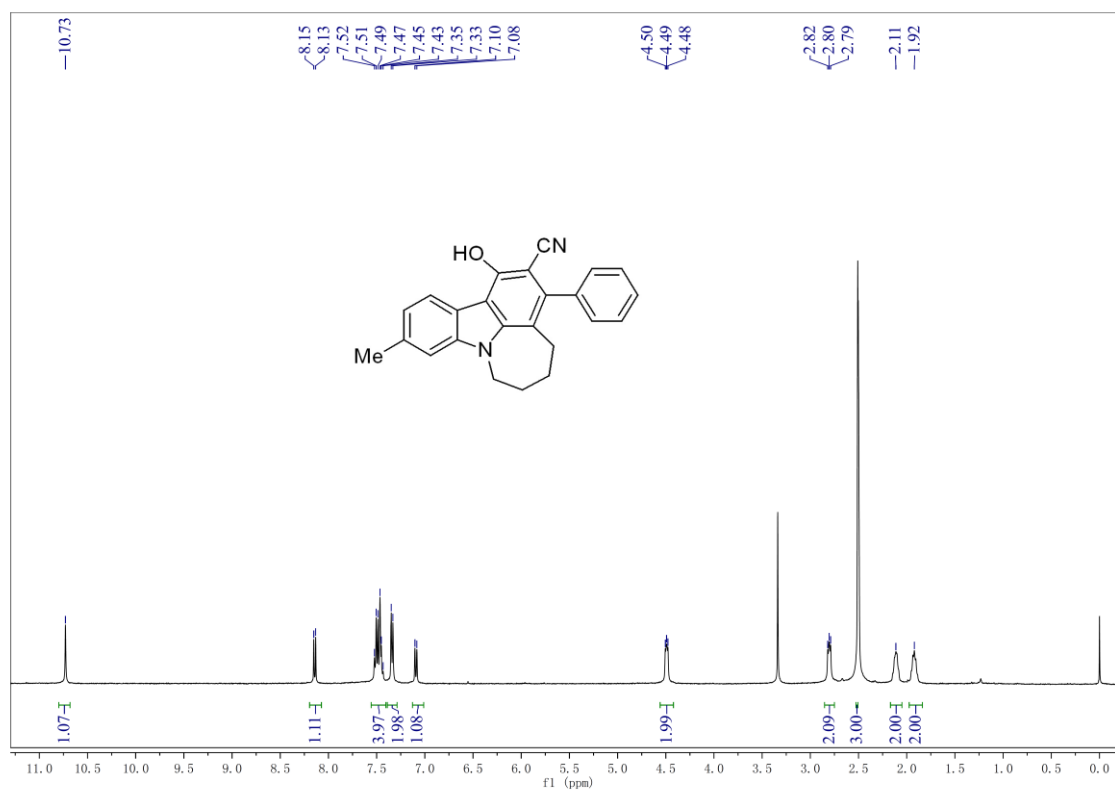



$^{13}\text{C}$  NMR spectrum of **2k** (DMSO- $d_6$ , 101 MHz)

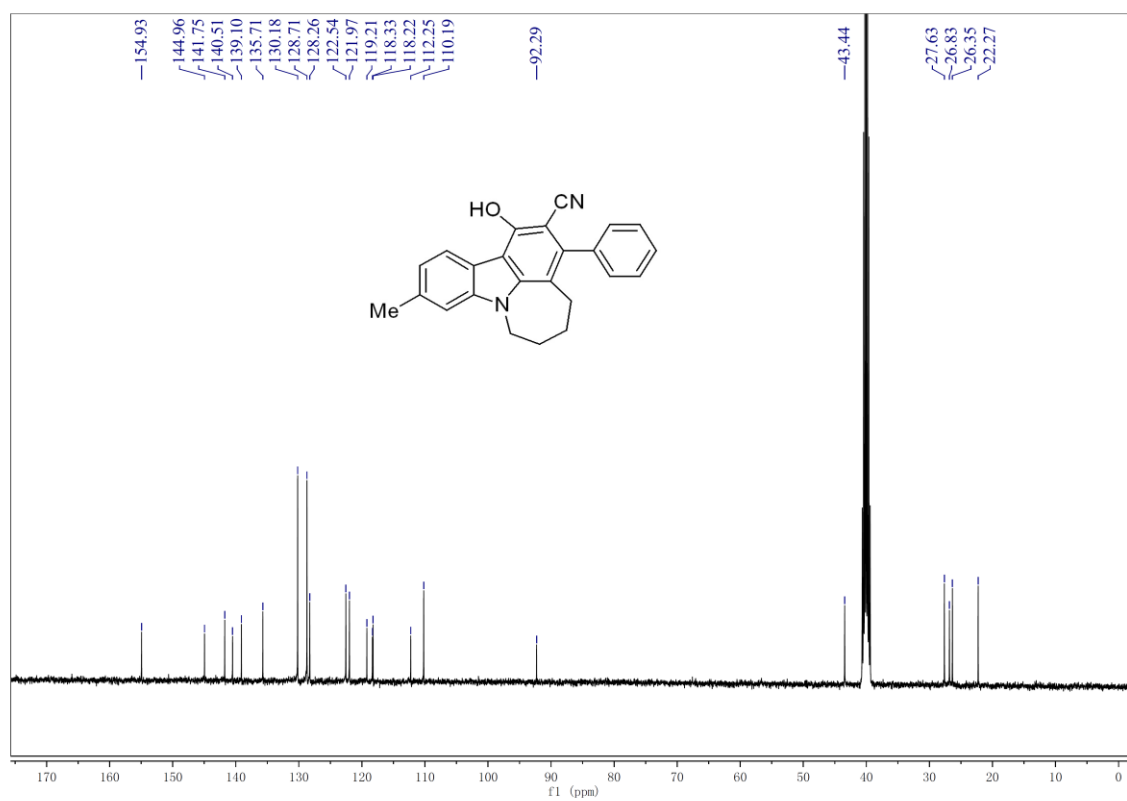

$^1\text{H}$  NMR spectrum of **2l** (DMSO- $d_6$ , 400 MHz)

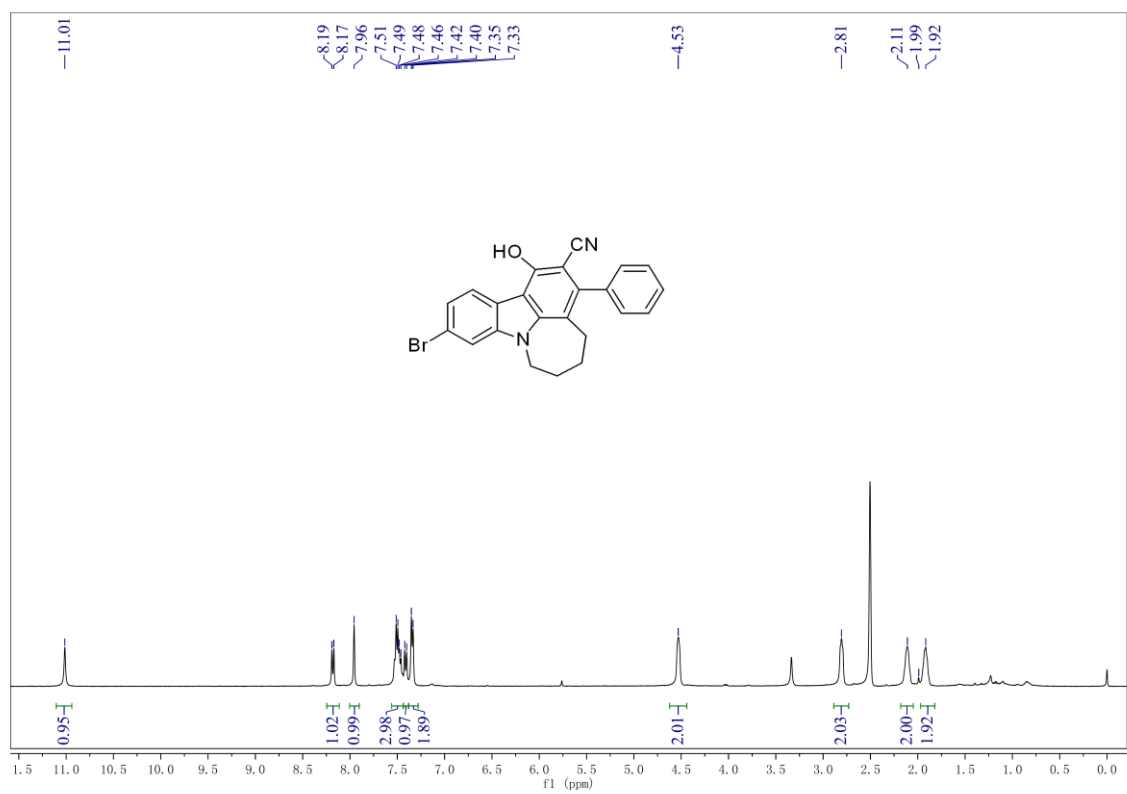

$^{13}\text{C}$  NMR spectrum of **2l** (DMSO- $d_6$ , 101 MHz)

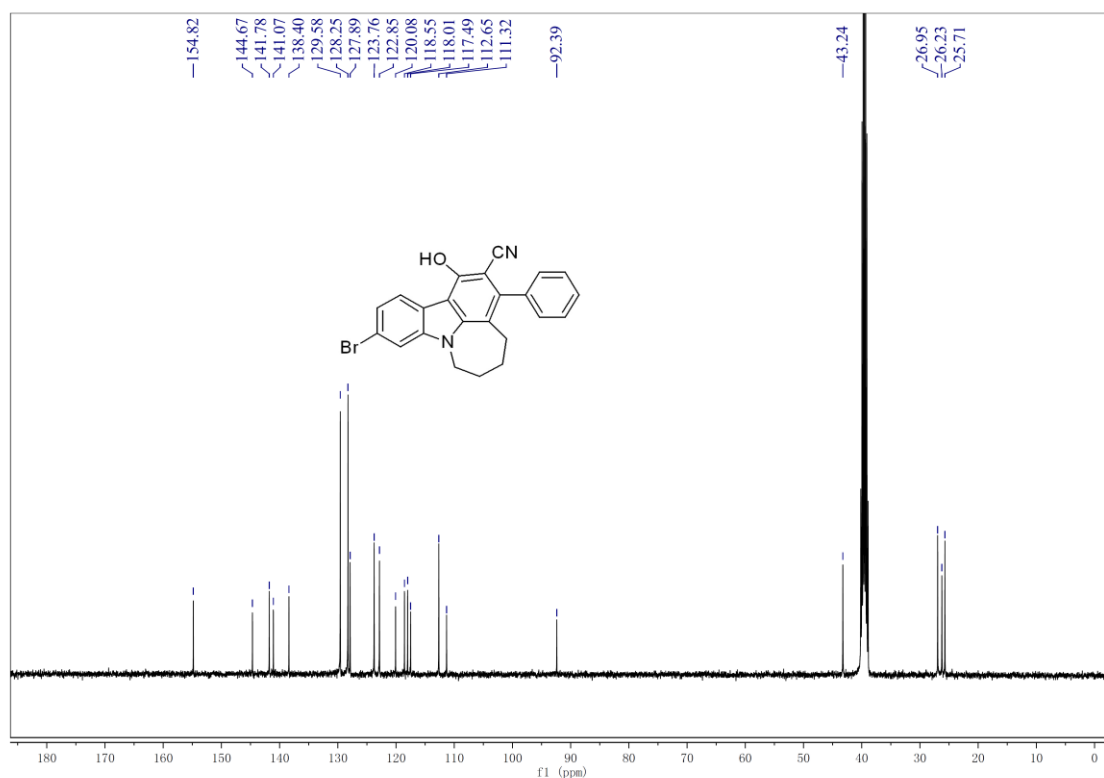

$^1\text{H}$  NMR spectrum of **2m** (DMSO- $d_6$ , 400 MHz)

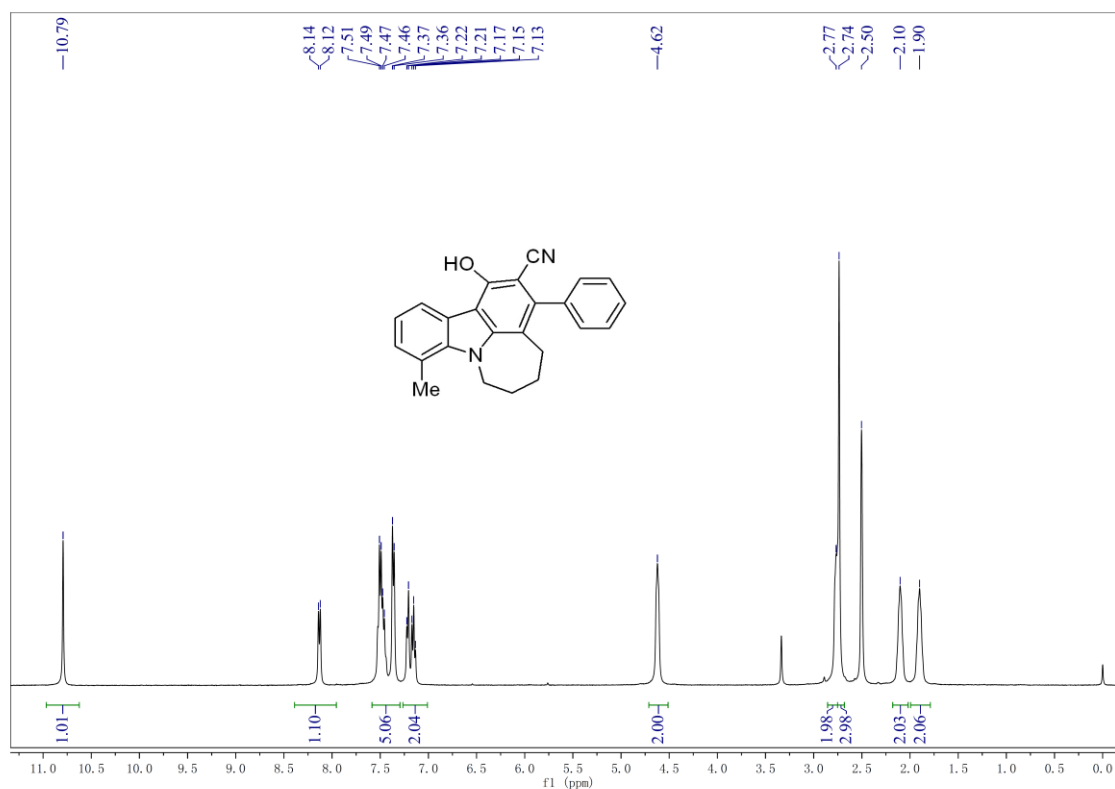

$^{13}\text{C}$  NMR spectrum of **2m** (DMSO- $d_6$ , 101 MHz)

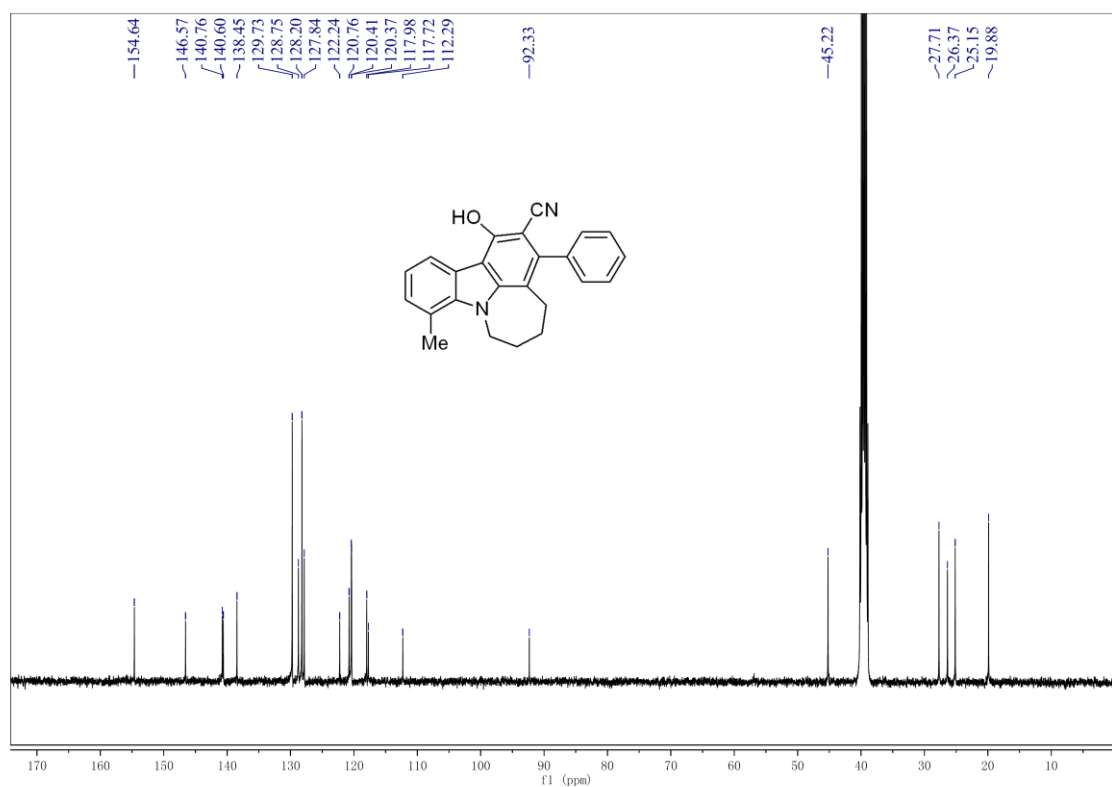

$^1\text{H}$  NMR spectrum of **2n** (DMSO- $d_6$ , 400 MHz)

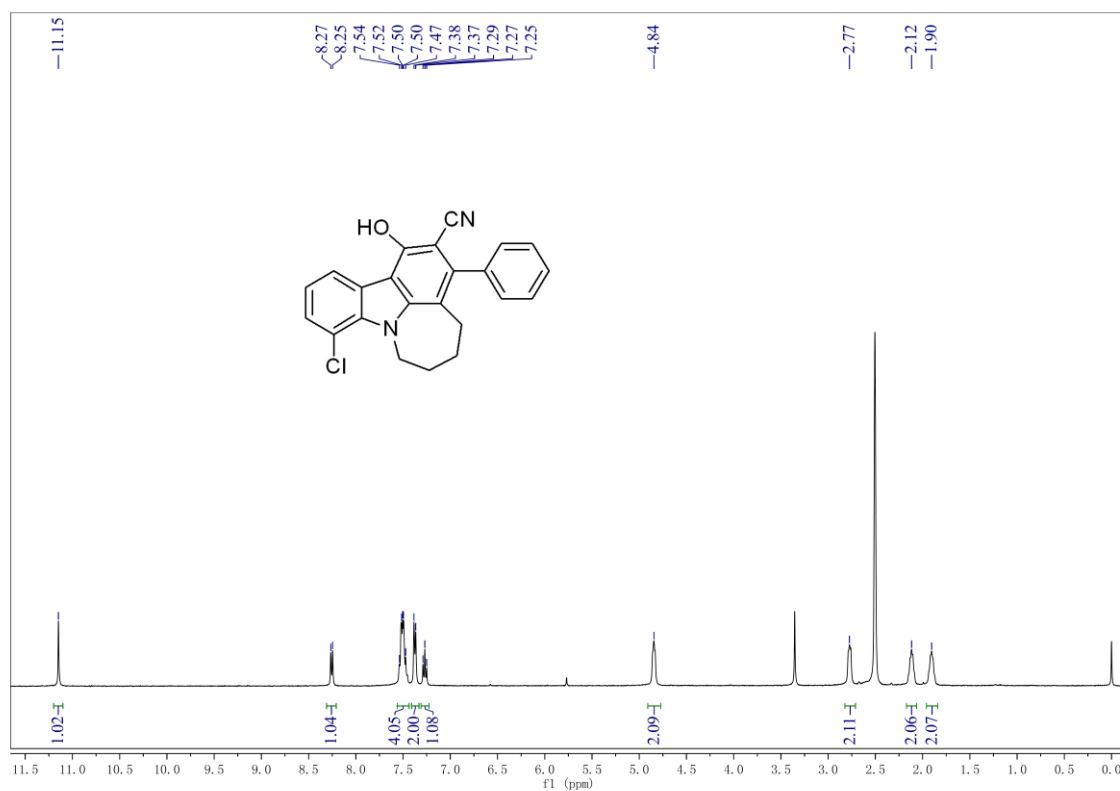

$^{13}\text{C}$  NMR spectrum of **2n** (DMSO- $d_6$ , 101 MHz)

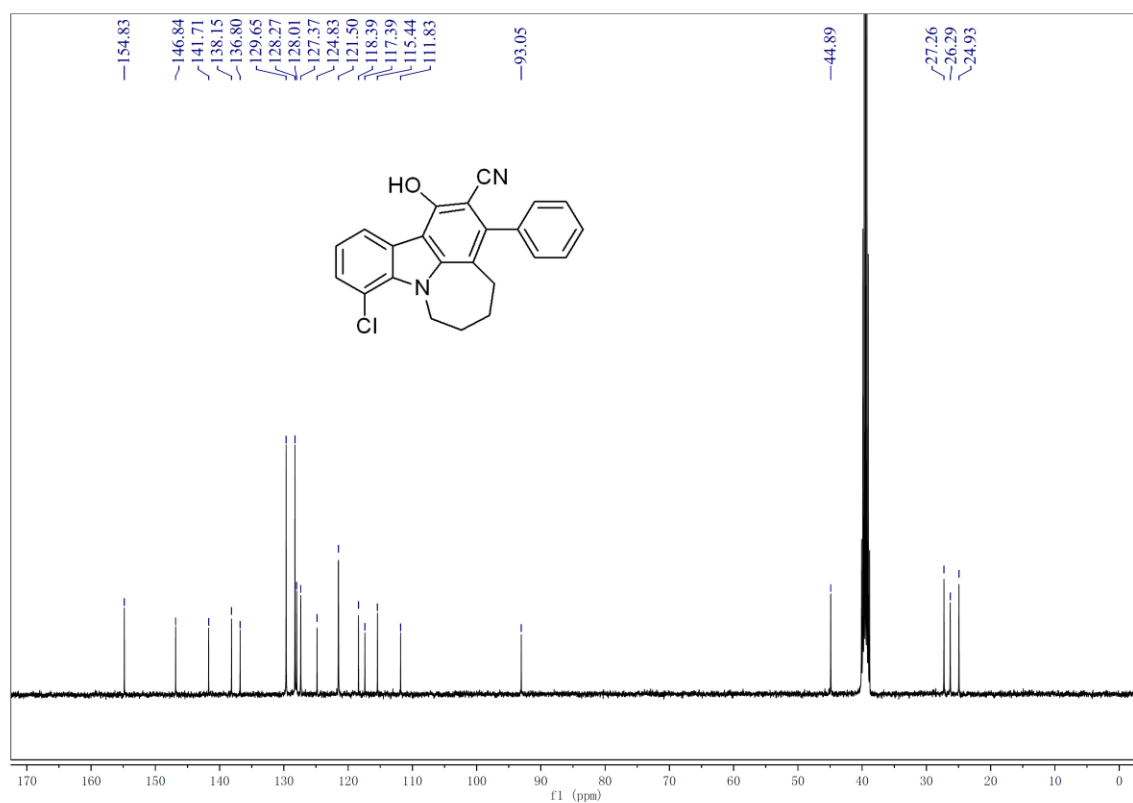

$^1\text{H}$  NMR spectrum of **2o** (DMSO- $d_6$ , 400 MHz)

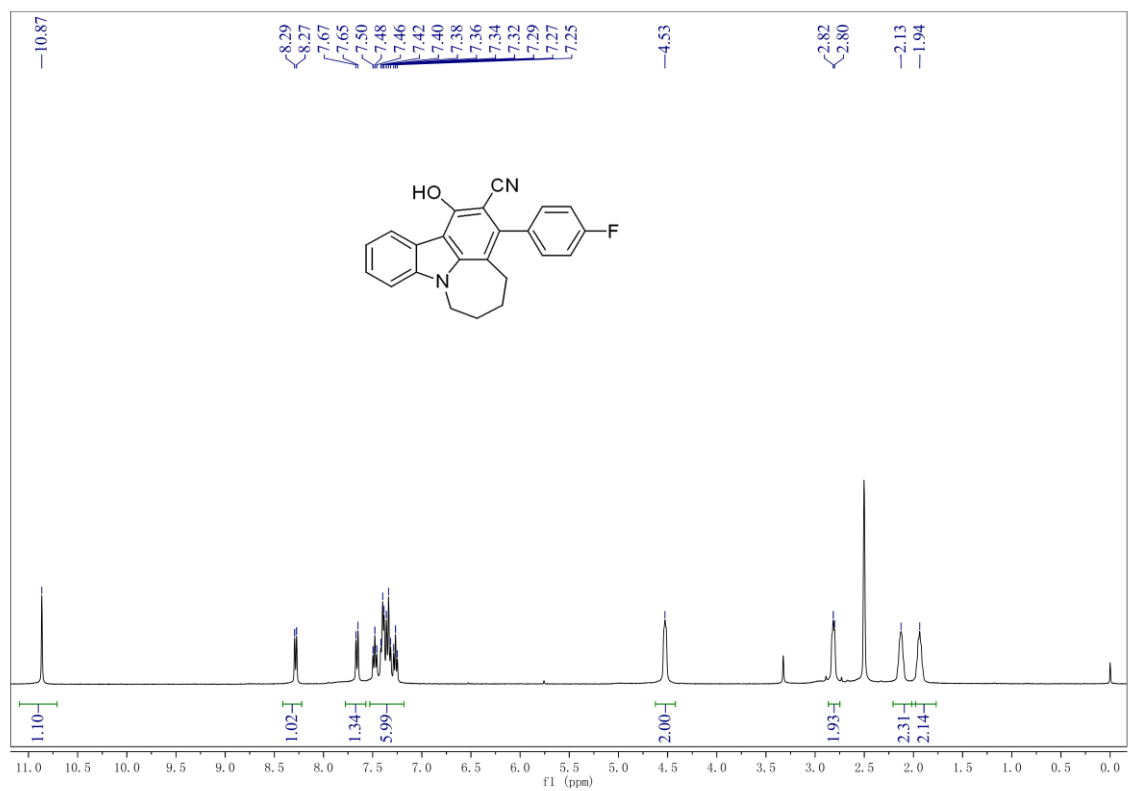

$^{13}\text{C}$  NMR spectrum of **2o** (DMSO- $d_6$ , 101 MHz)

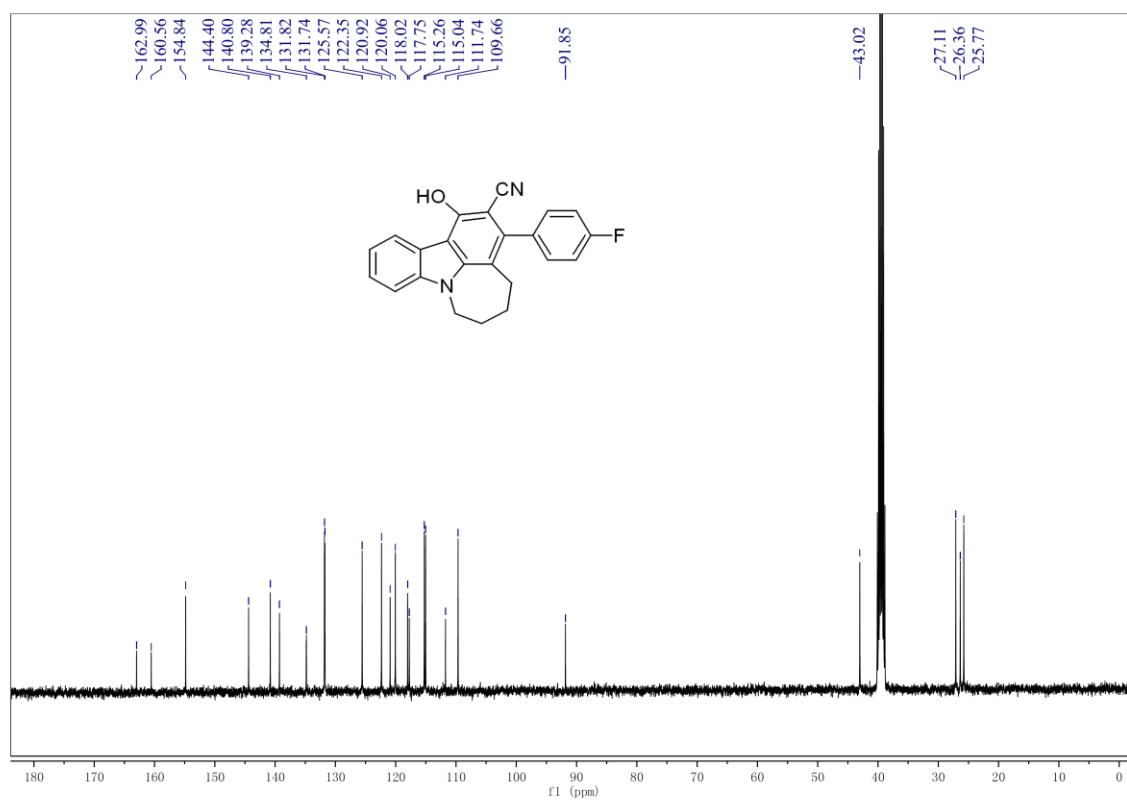

$^{19}\text{F}$  NMR spectrum of **2o** (DMSO- $d_6$ , 376 MHz)

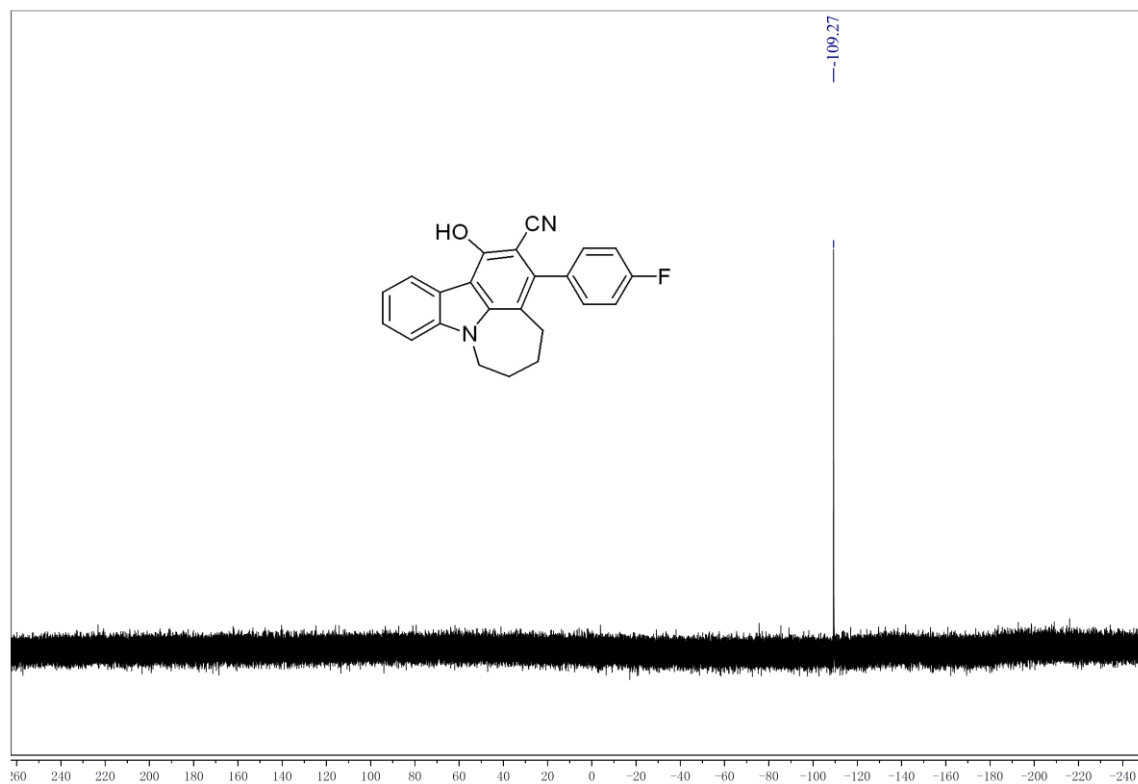

$^1\text{H}$  NMR spectrum of **2p** (DMSO- $d_6$ , 400 MHz)

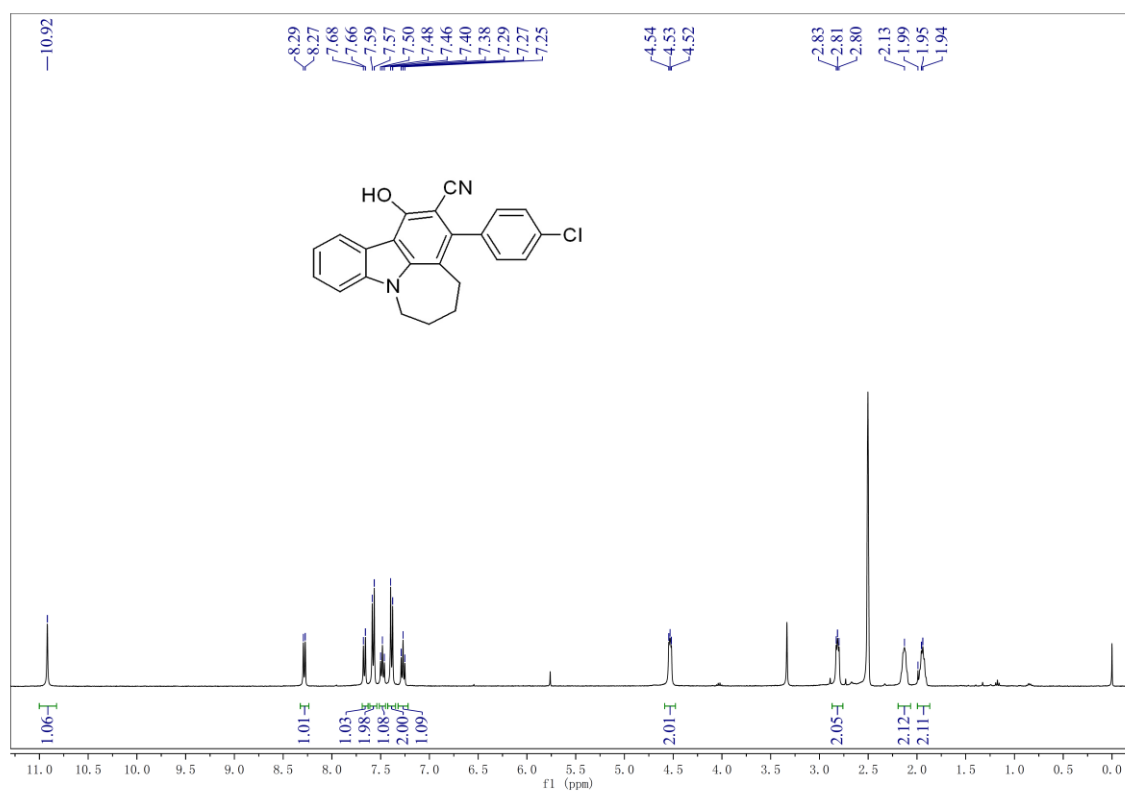

$^{13}\text{C}$  NMR spectrum of **2p** (DMSO- $d_6$ , 101 MHz)

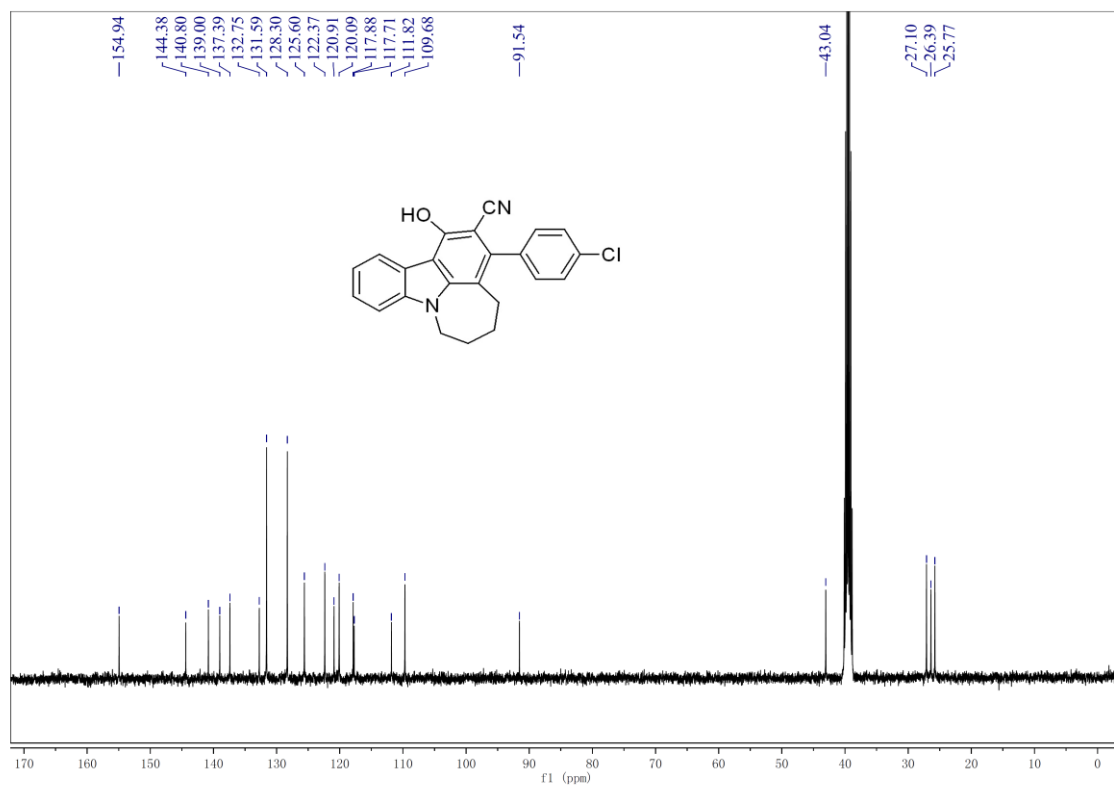

$^1\text{H}$  NMR spectrum of **2q** (DMSO- $d_6$ , 400 MHz)

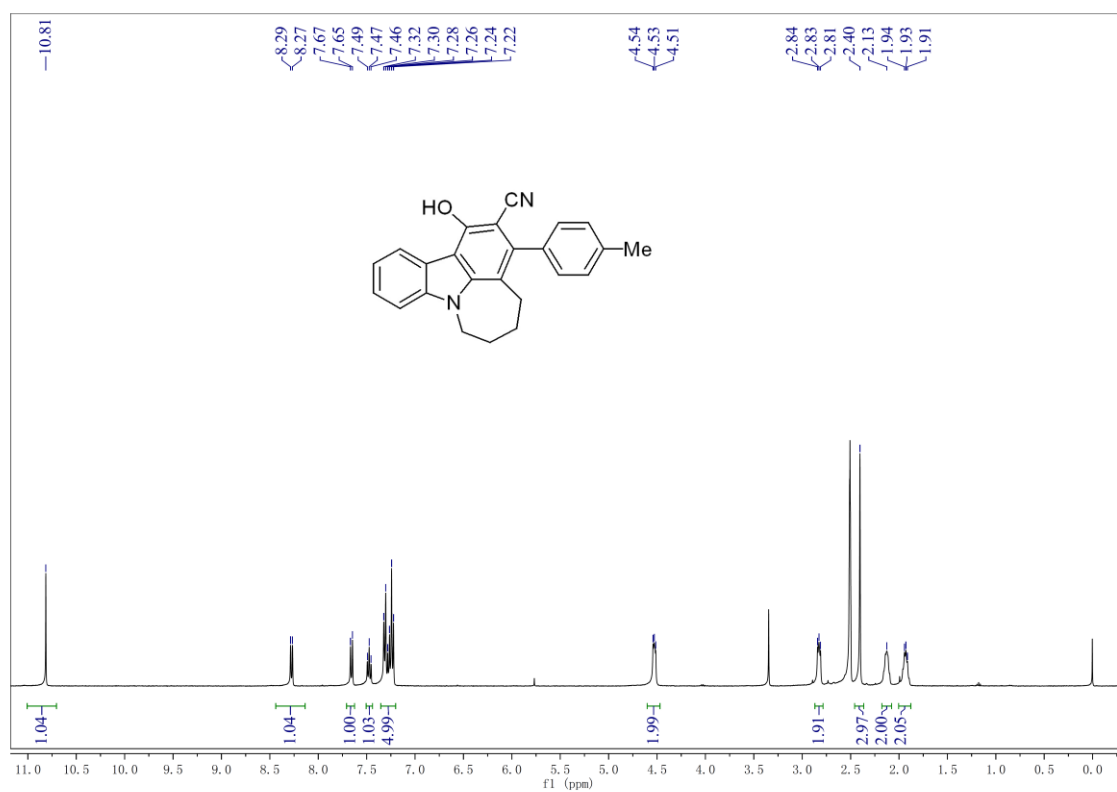

$^{13}\text{C}$  NMR spectrum of **2q** (DMSO- $d_6$ , 101 MHz)

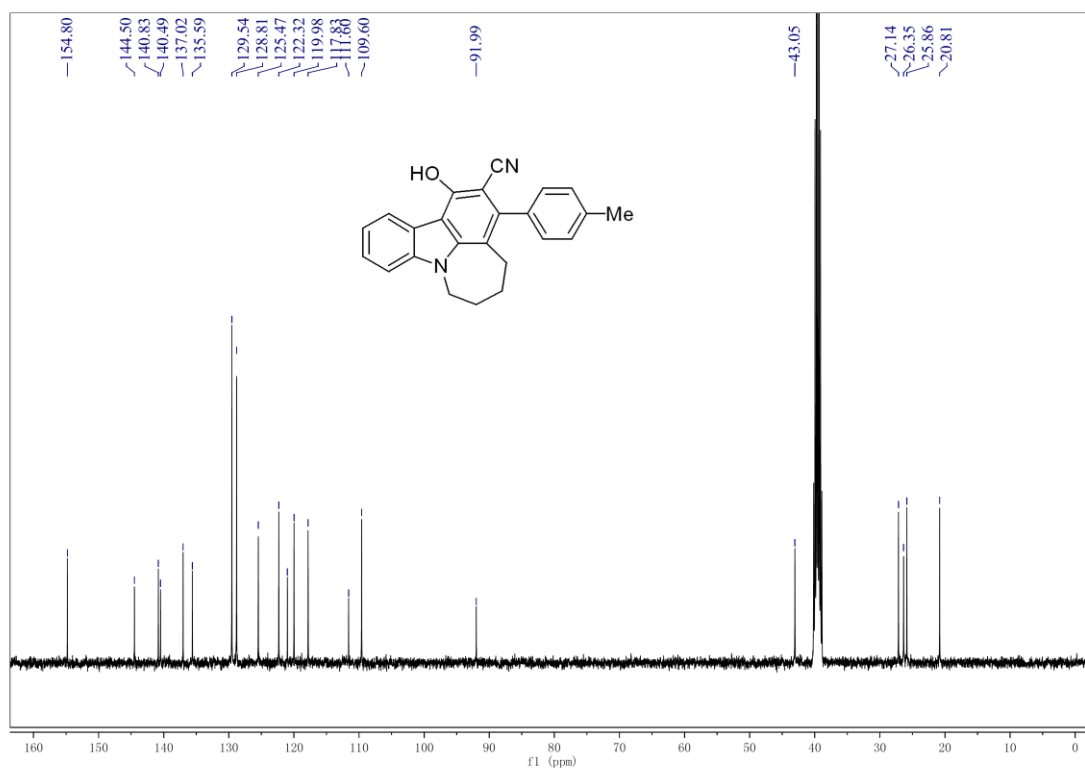

$^1\text{H}$  NMR spectrum of **2r** (DMSO- $d_6$ , 400 MHz)

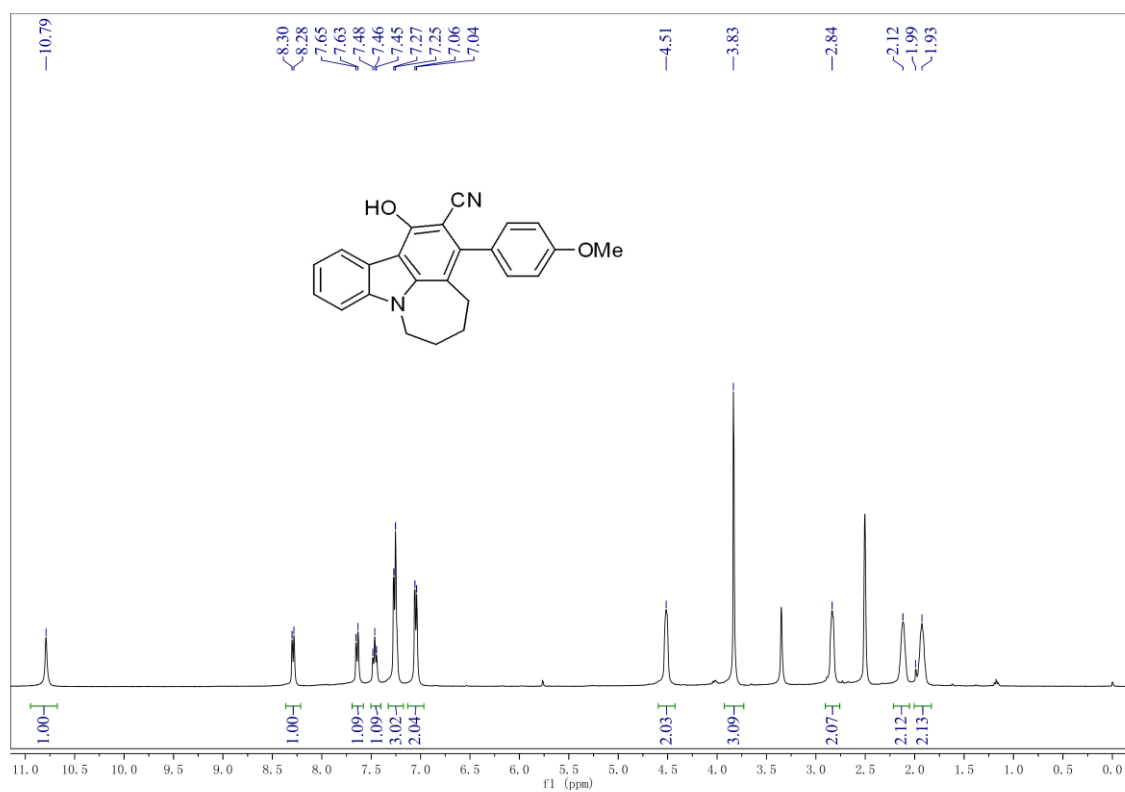

$^{13}\text{C}$  NMR spectrum of **2r** (DMSO- $d_6$ , 101 MHz)

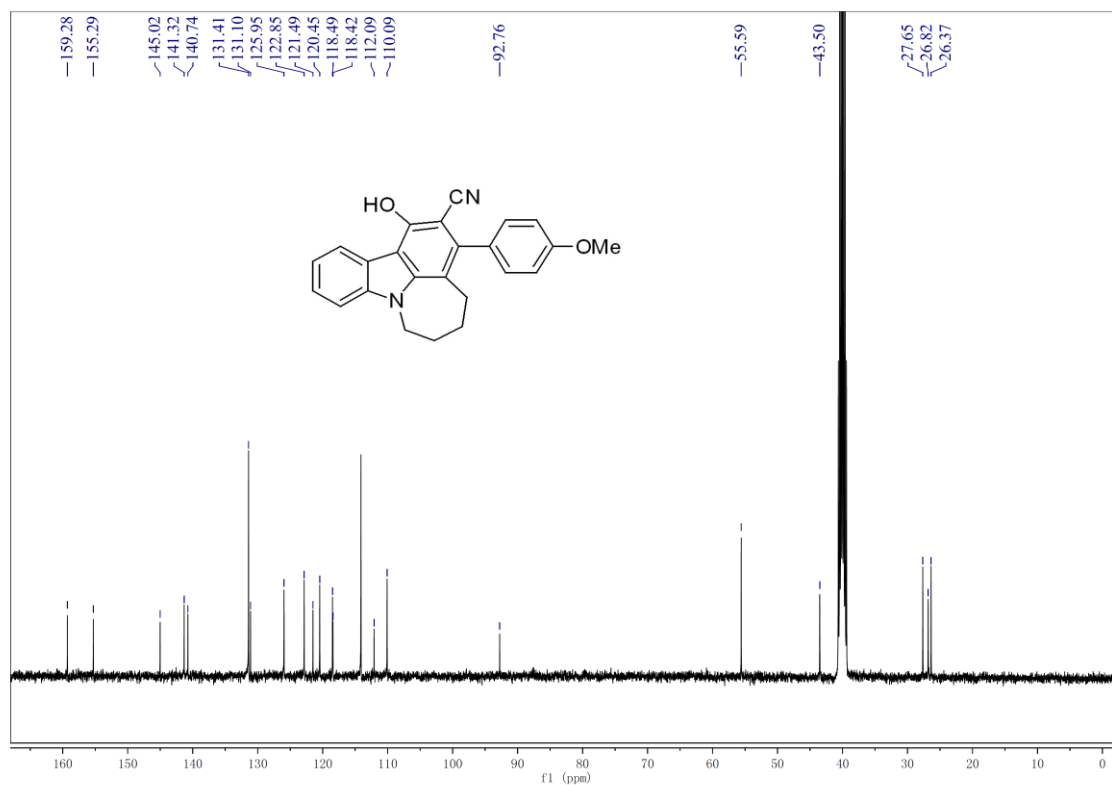



$^1\text{H}$  NMR spectrum of **2s** (DMSO- $d_6$ , 400 MHz)

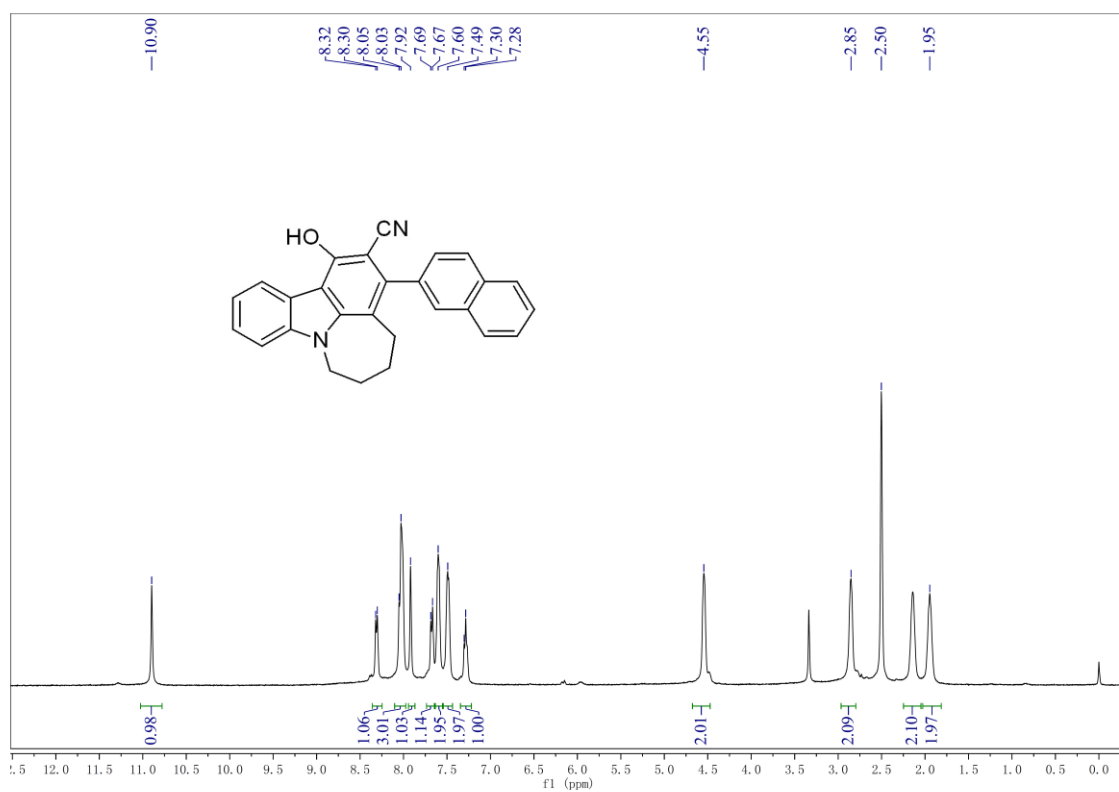

$^{13}\text{C}$  NMR spectrum of **2s** (DMSO- $d_6$ , 101 MHz)

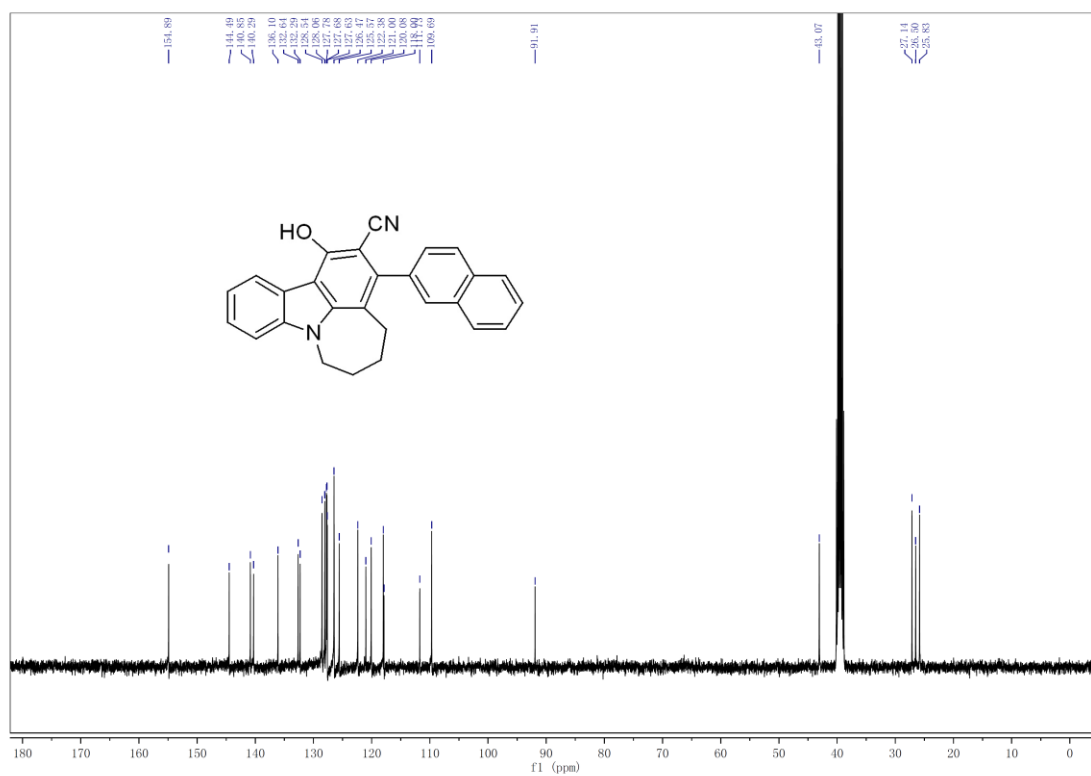

$^1\text{H}$  NMR spectrum of **2t** (DMSO- $d_6$ , 400 MHz)

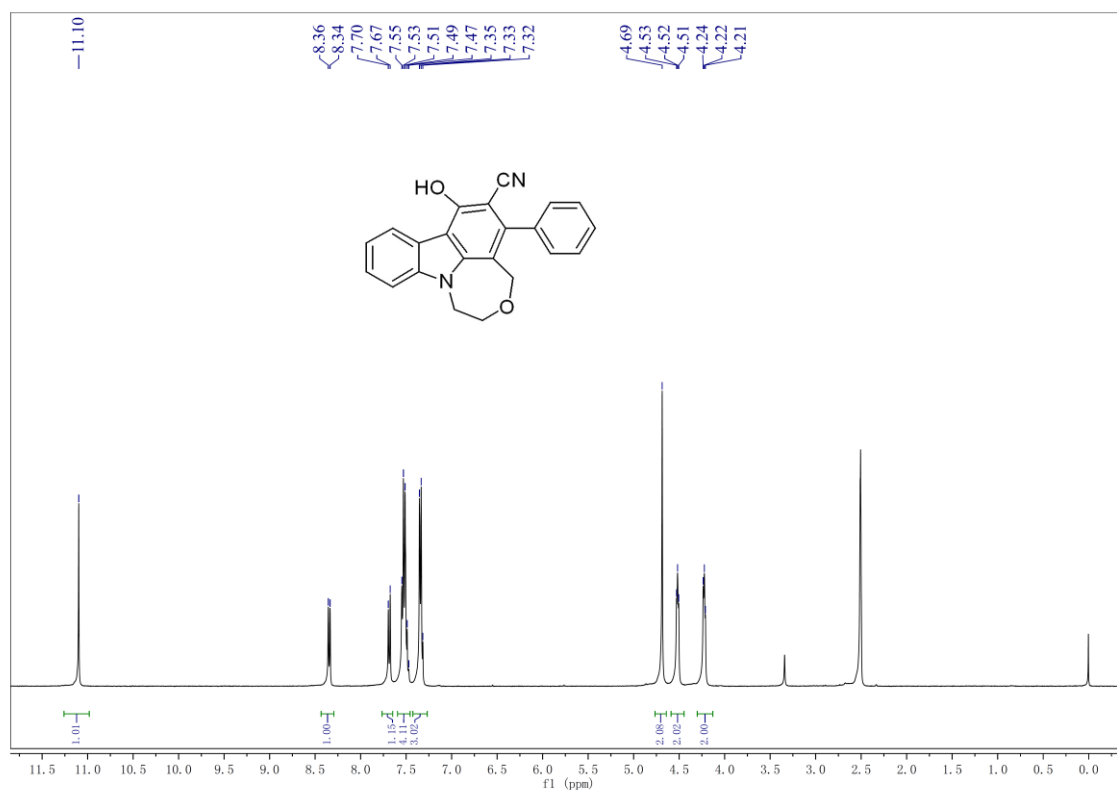

$^{13}\text{C}$  NMR spectrum of **2t** (DMSO- $d_6$ , 101 MHz)

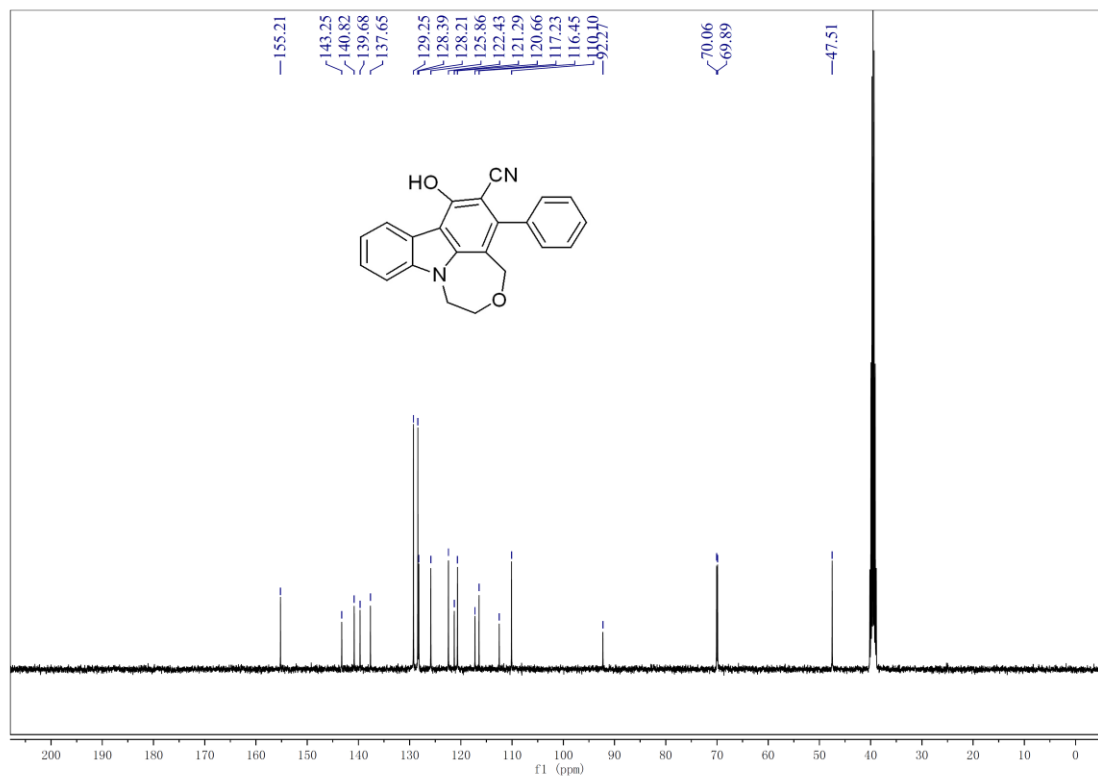

$^1\text{H}$  NMR spectrum of **2u** (DMSO- $d_6$ , 400 MHz)

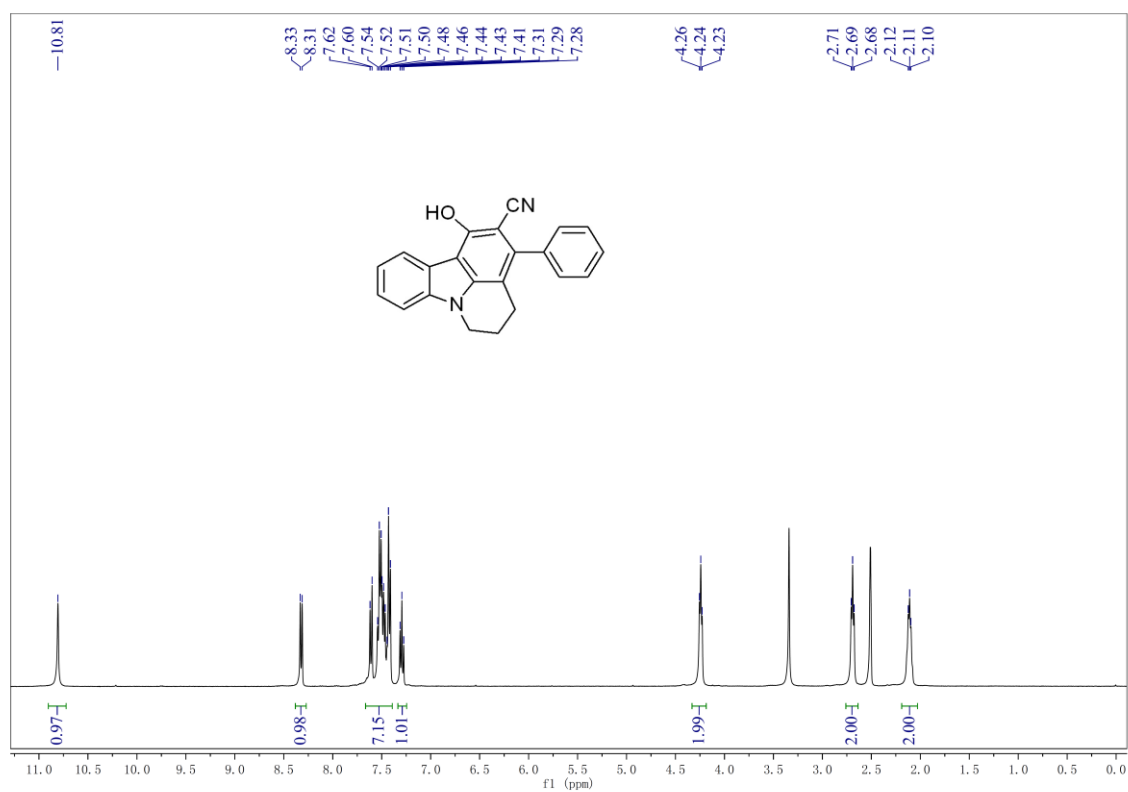

$^{13}\text{C}$  NMR spectrum of **2u** (DMSO- $d_6$ , 101 MHz)

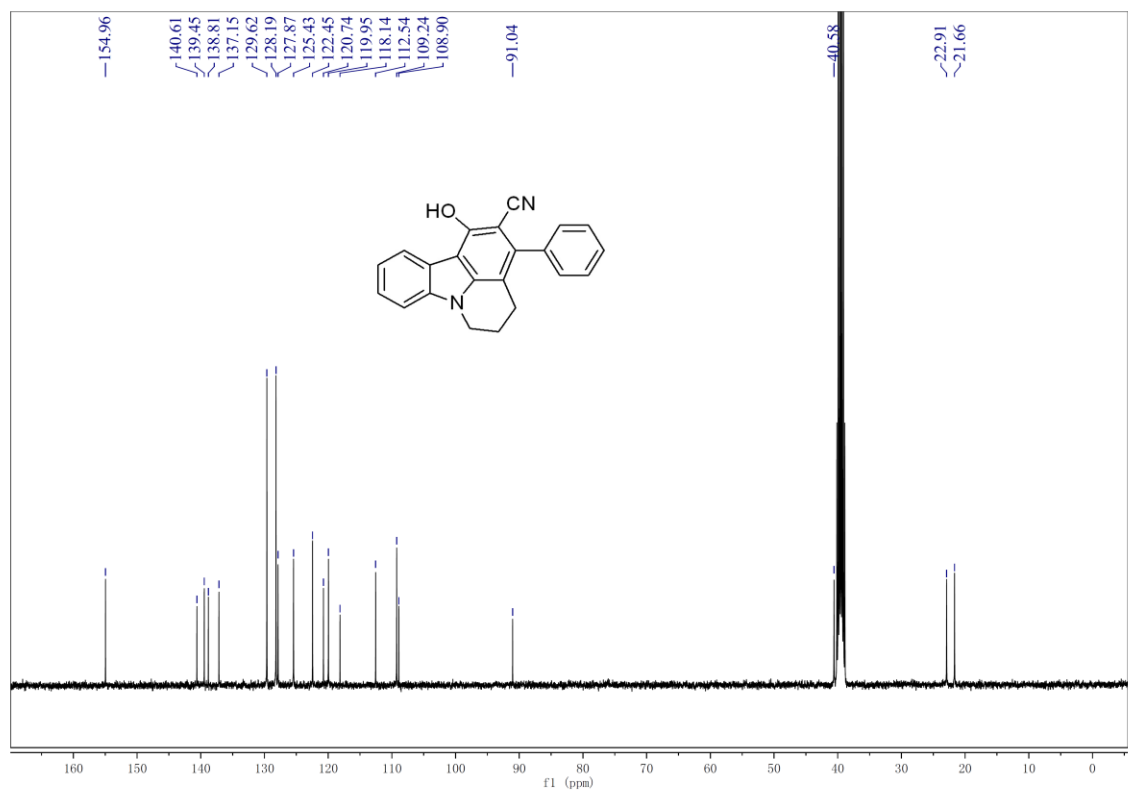

$^1\text{H}$  NMR spectrum of **2v** (DMSO- $d_6$ , 400 MHz)

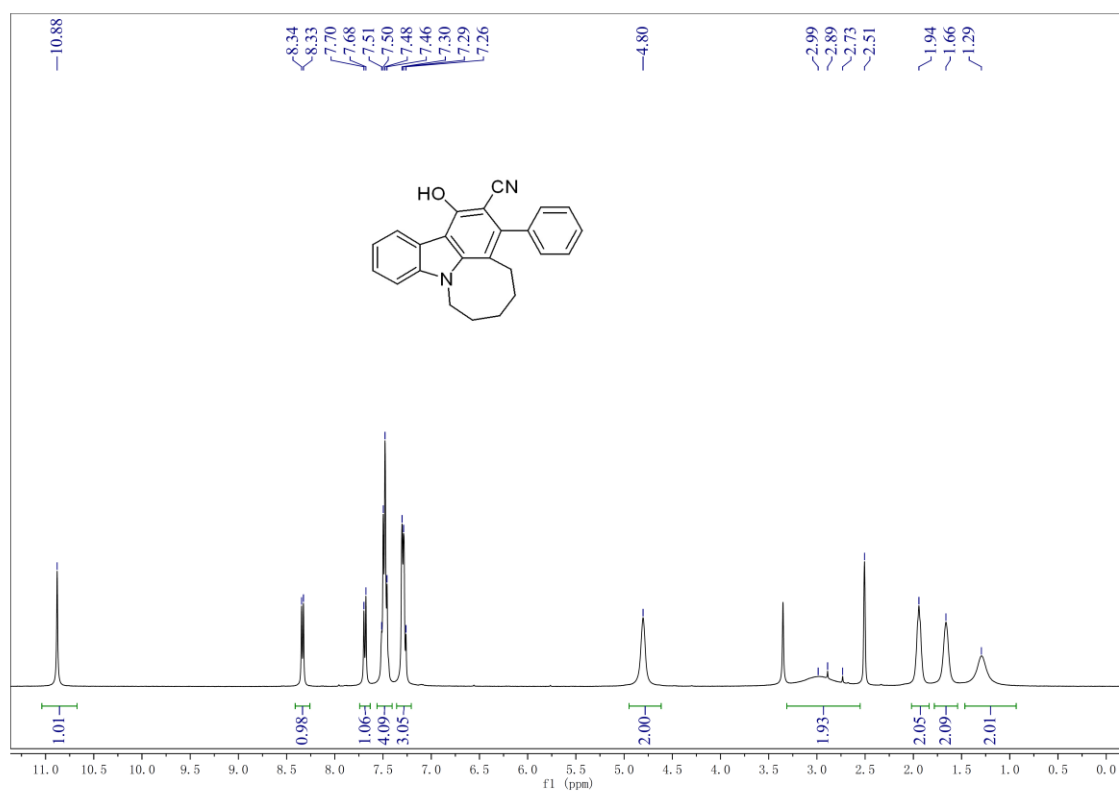

$^{13}\text{C}$  NMR spectrum of **2v** (DMSO- $d_6$ , 101 MHz)

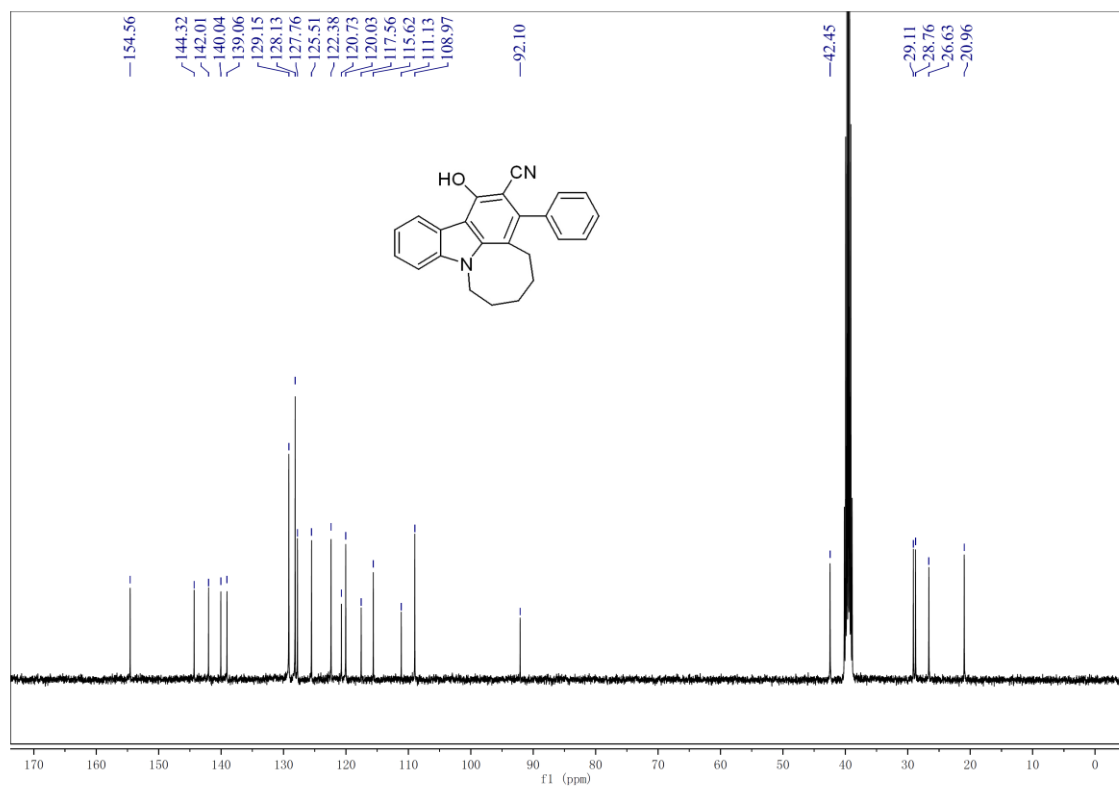

$^1\text{H}$  NMR spectrum of **8** (DMSO- $d_6$ , 400 MHz)

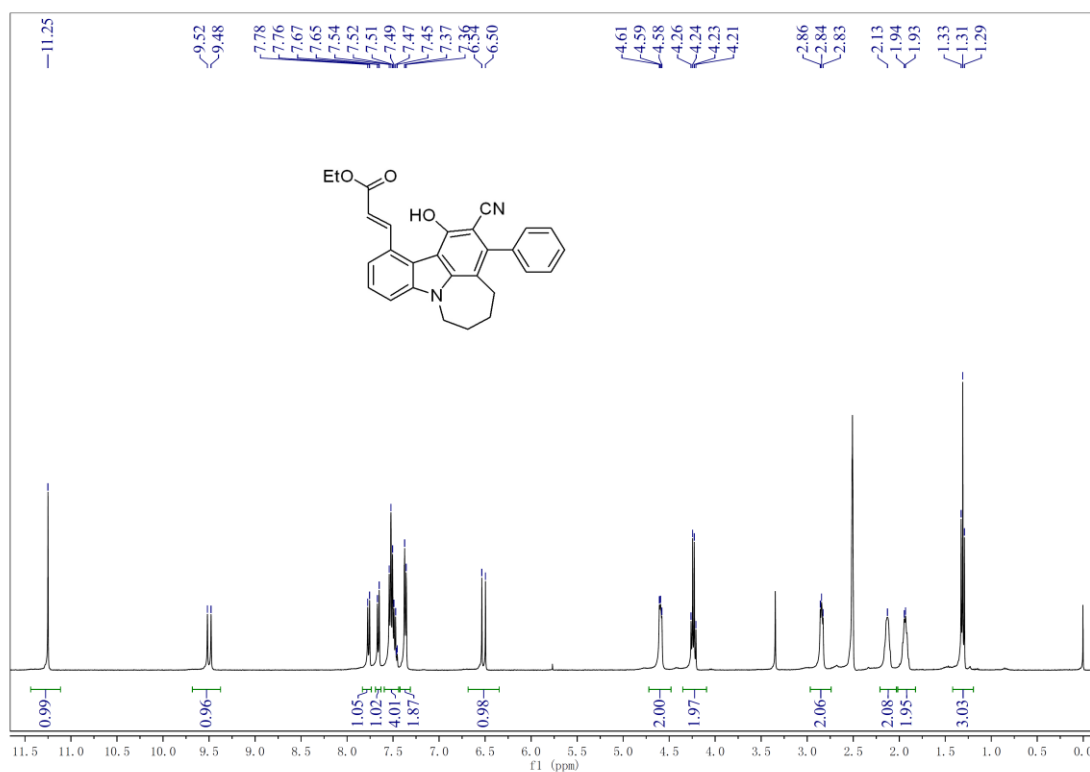

$^{13}\text{C}$  NMR spectrum of **8** (DMSO- $d_6$ , 101 MHz)

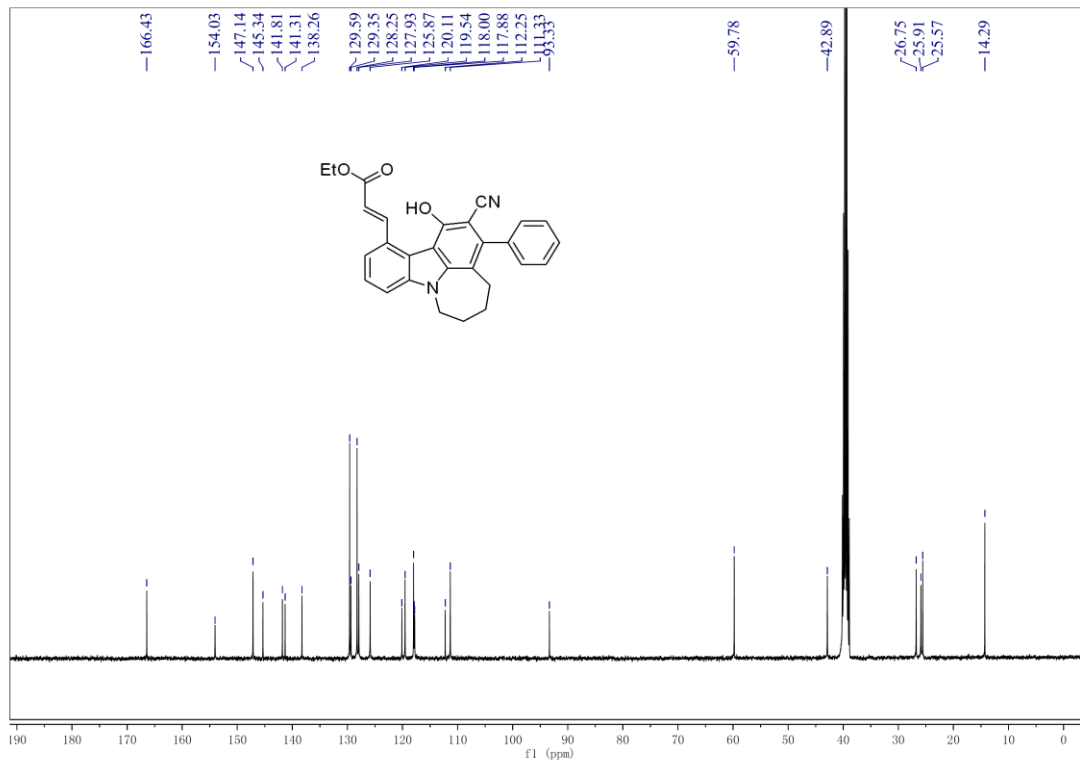

$^1\text{H}$  NMR spectrum of **10** ( $\text{DMSO-}d_6$ , 400 MHz)

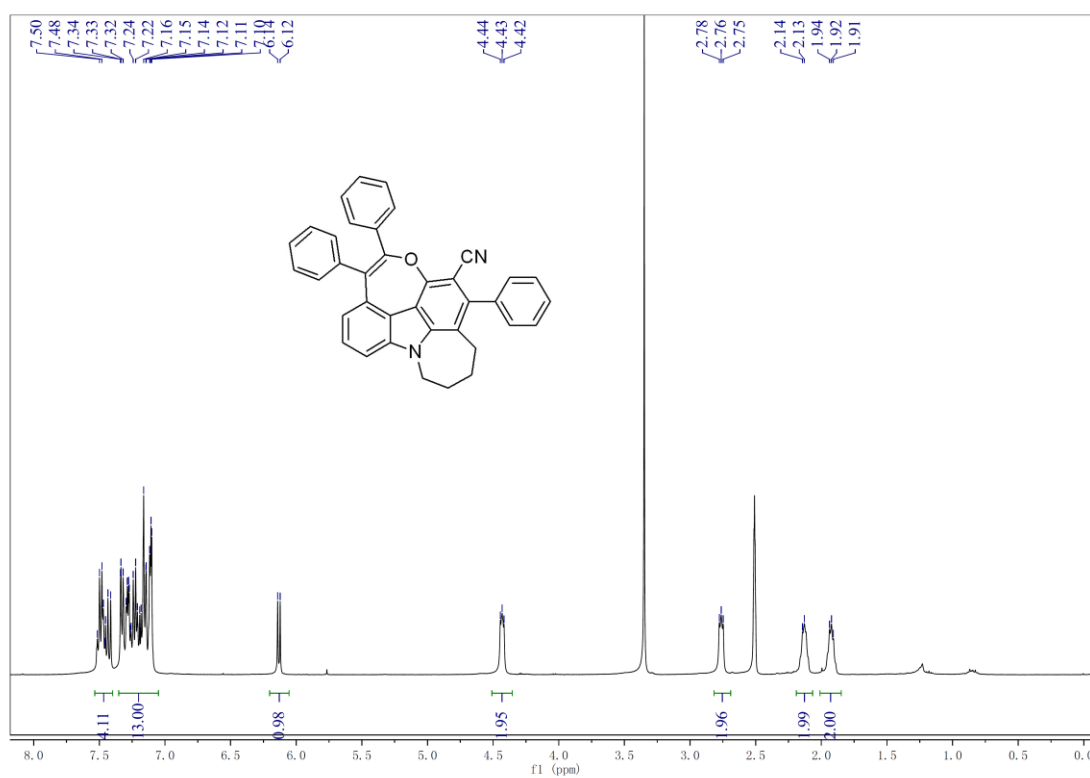

$^{13}\text{C}$  NMR spectrum of **10** ( $\text{CDCl}_3$ , 101 MHz)

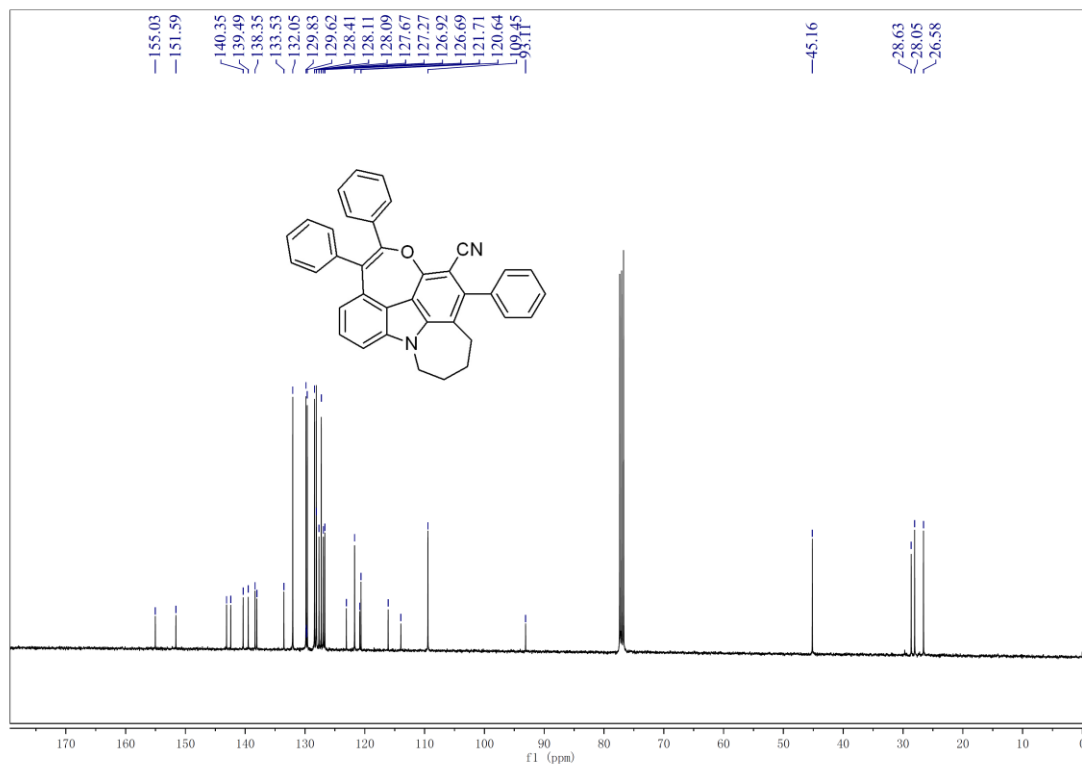

## 11. References

- (1) J. K. Crandall and W. J. Michaely, *J. Org. Chem.*, 1984, **49**, 4244.
- (2) J. Slätt, I. Romero and J. Bergman, *Synthesis.*, 2004, **16**, 2760.
- (3) T. Zhou, B. Li and B. Wang, *Chem. Commun.*, 2017, **53**, 6343.
